# Supplementary material for: Epigenomics, genomics, resistome, mobilome, virulome and evolutionary phylogenomics of carbapenem-resistant Klebsiella pneumoniae clinical strains
Source: PubMed Central journal article supplement — Microb Genom. 2020 Nov 10;6(12):mgen000474. doi: 10.1099/mgen.0.000474 (PMC8116673; doi:10.1099/mgen.0.000474), 2020-11-10
Supplement: mgen-6-474-s001.pdf [file mgen-6-474-s001.pdf]

# **SUPPLEMEN TARY DATA**

**1-3**

**Supplementary data 1.1: Primer sequences used for detecting carbapenemase genes in PCR assays of *K. pneumoniae* isolates**

| <i>Target</i> | <i>Gene</i>                    | <i>Primer (5' to 3')</i>                                  | <i>Amplicon size (bp)</i> | <i>Reference</i>             |
|---------------|--------------------------------|-----------------------------------------------------------|---------------------------|------------------------------|
| <i>IMP</i>    | <i>bla<sub>IMP</sub>(F)</i>    | <i>GGAATAGAGTGGCTTAAYTCTC</i>                             | 232                       | <i>Poirel et al., 2011</i>   |
|               | <i>bla<sub>IMP</sub>(R)</i>    | <i>GGTTTAAAYAAAAACAACCACC</i>                             |                           |                              |
| <i>KPC</i>    | <i>bla<sub>KPC</sub>(F)</i>    | <i>TGTCACTGTATCGCCGTC</i><br><i>CTCAGTGCTCTACAGAAAACC</i> | 900                       | <i>Doyle et al., 2012</i>    |
|               | <i>bla<sub>KPC</sub>(R)</i>    | <i>TTGTCATCCTTGTTAGGCG</i>                                |                           |                              |
| <i>VIM</i>    | <i>bla<sub>VIM</sub>(F)</i>    | <i>GATGGTGTTTGGTCGCATA</i>                                | 390                       | <i>Poirel et al., 2011</i>   |
|               | <i>bla<sub>VIM</sub>(R)</i>    | <i>CGAATGCGCAGCACCAG</i>                                  |                           |                              |
| <i>OXA</i>    | <i>bla<sub>OXA-48</sub>(F)</i> | <i>GCGTGGTTAAGGATGAACAC</i>                               | 438                       |                              |
|               | <i>bla<sub>OXA-48</sub>(R)</i> | <i>CATCAAGTTCAACCCAACCG</i>                               |                           |                              |
| <i>NDM</i>    | <i>bla<sub>NDM-1</sub>(F)</i>  | <i>GGTTTGGCGATCTGGTTTTTC</i>                              | 782                       |                              |
|               | <i>bla<sub>NDM-1</sub>(R)</i>  | <i>CGGAATGGCTCATCACGATC</i>                               |                           |                              |
| <i>GES</i>    | <i>bla<sub>GES</sub></i>       | <i>AGTCGGCTAGACCGGAAAG</i>                                | 399                       | <i>Dallenne et al., 2010</i> |
|               | <i>bla<sub>GES</sub></i>       | <i>TTTGTCCGTGCTCAGGAT</i>                                 |                           |                              |

F, sense primer, R, antisense primer

**Supplementary data 1.2: Primer sequences used for detecting replicons in CRKP isolates using the PBRT assay**

| <i>PCR type</i> | <i>Target</i>              | <i>Primer (5' to 3')</i>             | <i>Amplicon size</i> | <i>Reference</i>                           |
|-----------------|----------------------------|--------------------------------------|----------------------|--------------------------------------------|
| <b>M1</b>       | <i>II-αγ(F)</i>            | <i>cgaaagccggacggcagaa</i>           | 139                  | Carattoli et al., 2005                     |
|                 | <i>II-αγ(R)</i>            | <i>tcgtcgttccgccaagttcgt</i>         |                      |                                            |
|                 | <i>H11(F)</i>              | <i>ggagcgatggattactcagtac</i>        | 471                  |                                            |
|                 | <i>H11(R)</i>              | <i>tgccgttcacctcgtgagta</i>          |                      |                                            |
|                 | <i>H12(F)</i>              | <i>tttctctgagtcacctgtaaacac</i>      | 644                  |                                            |
|                 | <i>H12(R)</i>              | <i>ggctcactaccgttgcatcct</i>         |                      |                                            |
|                 | <i>X(R)</i>                | <i>tgagagtcaattttatctcatgttttagc</i> |                      |                                            |
| <b>M2</b>       | <i>M(F)</i>                | <i>ggatgaaaactatcagcatctgaag</i>     | 738                  | Carattoli et al., 2015                     |
|                 | <i>M(R)</i>                | <i>gaactccggcgaaagaccttc</i>         |                      |                                            |
|                 | <i>N(F)</i>                | <i>gtctaacgagcttaccgaag</i>          | 559                  |                                            |
|                 | <i>N(R)</i>                | <i>gttcaactctgccaagttc</i>           |                      |                                            |
|                 | <i>L(F)</i>                | <i>cggaaccgacatgtgcctact</i>         | 854                  |                                            |
|                 | <i>L(R)</i>                | <i>gaactccggcgaaagaccttc</i>         |                      |                                            |
| <b>M3</b>       | <i>W(F)</i>                | <i>cctaagaacaacaaagcccccg</i>        | 242                  | Carattoli et al., 2005; Villa et al., 2010 |
|                 | <i>W(R)</i>                | <i>ggtgcgcggcatagaaccgt</i>          |                      |                                            |
|                 | <i>FIA(F)</i>              | <i>ccatgctggttctagagaaggtg</i>       | 462                  |                                            |
|                 | <i>FIA(R)</i>              | <i>gtatatccttactggcttccgag</i>       |                      |                                            |
|                 | <i>FIB(F)</i>              | <i>ggagtctgacacacgattttctg</i>       | 683                  |                                            |
|                 | <i>FIB(R)</i>              | <i>tctgtttattctttactgtccac</i>       |                      |                                            |
| <b>M4</b>       | <i>FIC(F)</i>              | <i>gtgaactggcagatgaggaagg</i>        | 262                  | Carattoli et al., 2005                     |
|                 | <i>FIC(R)</i>              | <i>ttctcctcgtcgccaaactagat</i>       |                      |                                            |
|                 | <i>P(F)</i>                | <i>ctatggccctgcaaacgcgccagaaa</i>    | 534                  |                                            |
|                 | <i>P(R)</i>                | <i>tcacgcgccagggcgcagcc</i>          |                      |                                            |
|                 | <i>Y(F)</i>                | <i>aattcaaaacaacactgtgcagcctg</i>    | 765                  |                                            |
|                 | <i>Y(R)</i>                | <i>gcgagaatggacgattacaaaacttt</i>    |                      |                                            |
| <b>M5</b>       | <i>FIIA<sub>5</sub>(F)</i> | <i>ctgtcgtaagctgatgac</i>            | 270                  | Carattoli et al., 2005                     |
|                 | <i>FIIA<sub>5</sub>(R)</i> | <i>ctctgccacaaaacttcagc</i>          |                      |                                            |
|                 | <i>A/C(F)</i>              | <i>gagaaccaaagacaaagacctgga</i>      | 465                  |                                            |
|                 | <i>A/C(R)</i>              | <i>acgacaaacctgaattgcctcctt</i>      |                      |                                            |
|                 | <i>T(F)</i>                | <i>ttggcctgtttgtgcctaaacctat</i>     | 750                  |                                            |
|                 | <i>T(R)</i>                | <i>cgttgattacacttagctttggac</i>      |                      |                                            |
| <b>SI</b>       | <i>B/O(F)</i>              | <i>gcggtccggaagccagaaaac</i>         | 159                  |                                            |

|           |                           |                              |                |                                   |
|-----------|---------------------------|------------------------------|----------------|-----------------------------------|
|           | <i>B/O(R)</i>             | <i>tctgctccgccaagttcga</i>   |                | <i>Carattoli et al.,<br/>2005</i> |
| <i>S2</i> | <i>K(F)</i>               | <i>gcggtccggaagccagaaaac</i> | <i>160</i>     |                                   |
|           | <i>K(R)</i>               | <i>tctttcacgagcccgcaaaa</i>  |                |                                   |
| <i>S3</i> | <i>F(F)</i>               | <i>tgatcgtttaaggaattttg</i>  | <i>270</i>     |                                   |
|           | <i>F(R)</i>               | <i>gaagatcagtcacaccatcc</i>  |                |                                   |
| <i>S4</i> | <i>FII(F)</i>             | <i>ctgatcgtttaaggaatttt</i>  | <i>258-262</i> |                                   |
|           | <i>FII(R)</i>             | <i>cacaccatcctgcaactta</i>   |                | <i>Villa et al., 2010</i>         |
| <i>S5</i> | <i>FII<sub>k</sub>(F)</i> | <i>tcttctcaatcttggcgga</i>   | <i>142-148</i> |                                   |
|           | <i>FII<sub>k</sub>(R)</i> | <i>gcttatgttgacrgaagga</i>   |                |                                   |

---

F, sense primer, R, antisense primer



**Supplementary data 2.1: Resistance determinants of the carbapenem-resistant *K. pneumoniae* isolates**

| Isolate | Resistance mechanisms                                                                       |              |          |                |                                                                                               |                                                     |              |              | Sequence type | Plasmid (Inc) types                                                                                                                     |
|---------|---------------------------------------------------------------------------------------------|--------------|----------|----------------|-----------------------------------------------------------------------------------------------|-----------------------------------------------------|--------------|--------------|---------------|-----------------------------------------------------------------------------------------------------------------------------------------|
|         | B-lactams                                                                                   | Tetracycline | Phenicol | Fosfomicin     | Aminoglycosides                                                                               | Quinolone                                           | Sulphonamide | Trimethoprim |               |                                                                                                                                         |
| Kp8     | <b>OXA-181</b> ,<br><b>OXA-1</b> ,<br><b>CTX-M-15</b> ,<br><b>SHV-28</b> ,<br><b>TEM-1B</b> | tet(A)       | catB3    | fosA           | aac(3)-IIa,<br>aac(6')-lb-cr,<br>aph(3'')-lb,<br>aph(6)-ld                                    | aac(6')-lb-cr,<br>oqxA,<br>oqxB,<br>qnrB1,<br>qnrS1 | sul2         | dfrA14       | 307           | <i>ColKP3</i> ,<br><i>IncX3</i> ,<br><i>IncFIB(k)</i> ,<br><i>IncFII(k)</i>                                                             |
| Kp10    | <b>NDM-1</b> ,<br><b>OXA-1</b> ,<br><b>CTX-M-15</b> ,<br><b>SHV-11</b> ,<br><b>TEM-1B</b>   | tet(A)       | catB3    | fosA           | aac(6')-lb-cr,<br>aph(3'')-lb,<br>aph(6)-ld,<br>rmtC                                          | aac(6')-lb-cr,<br>oqxA,<br>oqxB,<br>qnrB1           | sul1, sul2   | dfrA14       | 39            | <i>IncFIB(k)</i> ,<br><i>IncFII(k)</i> ,<br><i>IncFII(yp)</i>                                                                           |
| Kp15    | <b>OXA-181</b> ,<br><b>CTX-M-15</b> ,<br><b>SHV-1</b> ,<br><b>TEM-1B</b>                    | tet(A)       | catA2    | fosA           | aac(3)-IIa,<br>aac(6')-lb-cr,<br><i>aac(6')-lb3</i> ,<br>aadA16,<br>aph(3')-lb,<br>aph(6)-ld, | aac(6')-lb-cr,<br>oqxA,<br>oqxB,<br>qnrB6,<br>qnrS1 | sul1, sul2   | dfrA27       | 607           | <i>ColKP3</i> ,<br><i>IncA/C2</i> ,<br><i>IncFIA(HII)</i> ,<br><i>IncFIB(k)</i> ,<br><i>IncFII(k)</i> ,<br><i>IncR</i> ,<br><i>IncU</i> |
| Kp29    | <b>NDM-7</b> ,<br><b>CTX-M-15</b> ,<br><b>SCO-1</b> ,<br><b>SHV-1</b> ,<br><b>TEM-1B</b>    | -            | catA2    | fosA           | aac(3)-IIa,<br>aac(6')-lb-cr,<br>aadA16,<br>aph(3')-lb,<br>aph(6)-ld                          | aac(6')-lb-cr,<br>oqxA,<br>oqxB                     | sul1, sul2   | dfrA27       | 17            | <i>IncFIA(HII)</i> ,<br><i>IncFIB(k)</i> ,<br><i>IncFII(k)</i> ,<br><i>IncR</i> ,<br><i>IncX3</i>                                       |
| Kp32    | <b>OXA-48</b> ,<br><b>OXA-1</b> ,<br><b>CTX-M-15</b> ,<br><b>SHV-11</b> ,                   | tet(A)       | catB3    | fosA,<br>fosA7 | aac(3)-IIa,<br>aac(6')-lb-cr,<br>aph(3')-lb,<br>aph(6)-ld                                     | aac(6')-lb-cr,<br>oqxA,<br>oqxB,<br>qnrB1           | sul2         | dfrA14       | 3559          | <i>IncFIB(k)</i> ,<br><i>IncFII(k)</i> ,                                                                                                |

|             |                                               |        |       |      |                                            |                                         |            |        |    |                                         |
|-------------|-----------------------------------------------|--------|-------|------|--------------------------------------------|-----------------------------------------|------------|--------|----|-----------------------------------------|
|             | <i>TEM-1B</i>                                 |        |       |      |                                            |                                         |            |        |    | <i>IncL/M</i>                           |
| <i>Kp33</i> | <i>NDM-1, OXA-1, CTX-M-15, SHV-11, TEM-1B</i> | tet(A) | catB3 | fosA | aac(6')-lb-cr, aph(3')-lb, aph(6)-ld, rmtC | <i>aac(6')-lb-cr, oqxA, oqxB, qnrB1</i> | sul1, sul2 | dfrA14 | 39 | <i>IncFIB(k), IncFII(k), IncFII(yP)</i> |

**Supplementary data 2.2. ARGs, ompK36 porin, and colistin- and fluoroquinolone-resistance-conferring mutations found on chromosomes of the *Klebsiella pneumoniae* strains**

| Strain (MLST) | Contig (genomic context) | Synteny of resistance genes (position on contig)                                                                     | Colistin resistance-conferring mutations* (mgrB, crrB, kpnEF, phoPQ, and pmrAB) | Fluoroquinolone resistance-conferring mutations* (gyrA, gyrB parC and parE) | ompK36 porin*                                                                                                                                                                                                                                                                              |
|---------------|--------------------------|----------------------------------------------------------------------------------------------------------------------|---------------------------------------------------------------------------------|-----------------------------------------------------------------------------|--------------------------------------------------------------------------------------------------------------------------------------------------------------------------------------------------------------------------------------------------------------------------------------------|
| KP8 (ST307)   | 1 (chromosome)           | blas <sub>HV-28(145206-146063)</sub>                                                                                 | crrB (D189E; V237I), pmrB (L213M), pmrA (A41T)                                  | parC (S104I) gyrA (S83I)                                                    | First 22aa were all mutated; no mutation from aa 23-372 (found on contig 5)                                                                                                                                                                                                                |
|               | 5 (chromosome)           | Oqx <sub>B19(3195309-3198461)</sub> ; Oqx <sub>A(3198485-3199657)</sub> ... fos <sub>A(1288555-1288974)</sub> ; LysR |                                                                                 |                                                                             |                                                                                                                                                                                                                                                                                            |
| KP10 (ST39)   | 1 (chromosome)           | blas <sub>HV-11(45566-46423)</sub>                                                                                   | crrB (gene absent), pmrA (M66I)                                                 | No mutation                                                                 | First 22aa were all mutated; Del TS (183-184), P185A, A192W, L193S, Y209W, N224T, G225D, D226E, R229S, L230V, D231P, K232A, Ins L (232-233), T256S, Del FSGNGE (267-272), S273A, D274G, I276L, Del S (277), I312L, Ins R (313-314), L320I, E349D, D351S, R355N. (found on contig 3)        |
|               | 3 (chromosome)           | Oqx <sub>B19(745718-748870)</sub> ; Oqx <sub>A(748894-750066)</sub>                                                  |                                                                                 |                                                                             |                                                                                                                                                                                                                                                                                            |
|               | 6 (chromosome)           | fos <sub>A(1347213-1347620)</sub> ; LysR                                                                             |                                                                                 |                                                                             |                                                                                                                                                                                                                                                                                            |
| KP15 (ST607)  | 3 (chromosome)           | Oqx <sub>B19(1205099-1208251)</sub> ; Oqx <sub>A(1208275-1209447)</sub>                                              | crrB (gene absent)                                                              | No mutation                                                                 | First 22aa were all mutated; Q54**, Del TS (183-184), P185A, A192W, L193S, Y209W, N224T, G225D, D226E, R229S, L230V, D231P, K232A, Ins L (232-233), T256S, Del FSGNGE (267-272), S273A, D274G, I276L, Del S (277), I312L, Ins R (313-314), L320I, E349D, D351S, R355N. (found on contig 2) |
|               | 5 (chromosome)           | fos <sub>A(1444779-1445186)</sub> ; LysR                                                                             |                                                                                 |                                                                             |                                                                                                                                                                                                                                                                                            |
|               | 8 (chromosome)           | blas <sub>HV-1(280230-281087)</sub>                                                                                  |                                                                                 |                                                                             |                                                                                                                                                                                                                                                                                            |
| KP29 (ST17)   | 6 (chromosome)           | fos <sub>A(984001-984408)</sub> ; LysR... Oqx <sub>B19(2832714-2835866)</sub> ; Oqx <sub>A(2835890-2837062)</sub>    | crrB (D189E; V237I), kpnE (K112Q), pmrA (E57G)                                  | No mutation                                                                 | First 22aa were all mutated; T86V, S88G, S89T, S90D, D91K, A93S, Del GT (182-183), S184D, P185M, L193Q, L204V, Y209W, N224T, G225D, R229N, D231V, K232L, N237D, T256S, Del FSGNGE (267-272), S273A, D274G, I276L, Del S (277),                                                             |
|               | 9 (chromosome)           | blas <sub>HV-1(30422-31279)</sub>                                                                                    |                                                                                 |                                                                             |                                                                                                                                                                                                                                                                                            |

|                      |                       |                                                                                                                                                       |                                                                  |                    |                                                                                                                                                                                                                                                               |
|----------------------|-----------------------|-------------------------------------------------------------------------------------------------------------------------------------------------------|------------------------------------------------------------------|--------------------|---------------------------------------------------------------------------------------------------------------------------------------------------------------------------------------------------------------------------------------------------------------|
|                      |                       |                                                                                                                                                       |                                                                  |                    | <i>I312L, Ins R (313-314), L320I, E349D, D351S, R355N. (found on contig 6)</i>                                                                                                                                                                                |
| <i>KP32 (ST3559)</i> | <i>1 (chromosome)</i> | <i>bla<sub>SHV-11</sub>(45566-6423)...fosA<sub>(1599312-1599719)</sub>:LysR...Oqx<sub>B19</sub>(3483431-3486583):Oqx<sub>A</sub>(3486607-3487779)</i> | <i>crrB (gene absent), mgrB (F44L; I45V), kpnE (I88M; K107R)</i> | <i>No mutation</i> | <i>First 22aa were all mutated; T183A, G191T, F200Y, Ins L (183-184), H220N, N224L, Ins S (228-229), R229K, D231A, K232L, Del FSGNGE (267-272), S273A, D274G, I276L, Del S (277), I312L, Ins R (313-314), L320I, E349D, D351S, R355N. (found on contig 1)</i> |
| <i>KP33 (ST39)</i>   | <i>1 (chromosome)</i> | <i>bla<sub>SHV-11</sub>(45566-46423)</i>                                                                                                              | <i>crrB (gene absent), pmrA (M66I)</i>                           | <i>No mutation</i> | <i>First 22aa were all mutated; Del TS (183-184), P185A, A192W, L193S, Y209W, N224T, G225D, D226E, R229S, L230V, D231P, K232A,</i>                                                                                                                            |
|                      | <i>3 (chromosome)</i> | <i>Oqx<sub>B19</sub>(745718-748870):Oqx<sub>A</sub>(748894-750066)</i>                                                                                |                                                                  |                    | <i>Ins L (232-233), T256S, Del FSGNGE (267-272), S273A, D274G, I276L, Del S (277), I312L, Ins R (313-314), L320I, E349D, D351S, R355N. (found on contig 3)</i>                                                                                                |
|                      | <i>6 (chromosome)</i> | <i>fosA<sub>(1347213-1347620)</sub>:LysR</i>                                                                                                          |                                                                  |                    |                                                                                                                                                                                                                                                               |

\*Genes without mutations are not shown. Reference *K. pneumoniae* genome used was *K. pneumoniae* ATCC 13883 (PRJNA244567)

**Supplementary data 2.3. Comparison of closely related *K. pneumoniae* strains on the phylogeny tree reported in different countries**

| <i>Strain</i>            | <i>Country</i>       | <i>Year</i> | <i>Sequence Type (ST)</i> | <i>Resistance determinants</i>                                                                                                                                                                        | <i>Plasmids replicons</i>                                                                                                  |
|--------------------------|----------------------|-------------|---------------------------|-------------------------------------------------------------------------------------------------------------------------------------------------------------------------------------------------------|----------------------------------------------------------------------------------------------------------------------------|
| <i>KP33_1</i>            | <i>Thailand</i>      | <i>2015</i> | <i>ST14</i>               | <i>NDM-1, CTX-M-15, aadA2, armA, aph(3')-VIa, msr(E), mph(E), sul1, dfrA12, dfrA1, dfrA14, aac(6')-Ib, aac(6')-Ib-cr, cat, qnrB1, tet(D).</i>                                                         | <i>IncHI1B</i>                                                                                                             |
| <i>KP64</i>              | <i>Thailand</i>      | <i>2015</i> | <i>ST14</i>               | <i>NDM-1, CTX-M-15, OXA-1, SHV-28, TEM-1B, aadA2, armA, aph(3')-VIa, msr(E), mph(E), sul1, dfrA12, dfrA1, cat, aac(6')-Ib-cr, aac(6')-Ib, fosA, oqxAB,</i>                                            | <i>IncR</i>                                                                                                                |
| <i>CR-HvKP1</i>          | <i>China</i>         | <i>2016</i> | <i>ST11</i>               | <i>KPC-2, CTX-M-65, TEM-1B, rmtB, catA2, fosA14</i>                                                                                                                                                   | <i>IncFII/R,</i><br><i>IncI1</i>                                                                                           |
| <i>CRKP-1215</i>         | <i>South Korea</i>   | <i>2014</i> | <i>ST147</i>              | <i>NDM-5, OXA-181, CTX-M-15, TEM-1B, SHV-11, OXA-1, aadA3, aac(6')-Ib-cr, aacA4, dfrA23, sul1, mph(A), rmt(B), erm(B), fosA, oqxAB</i>                                                                | <i>IncFII</i>                                                                                                              |
| <i>CNI</i>               | <i>United States</i> | <i>2013</i> | <i>ST392</i>              | <i>KPC-2, CTX-M-15, OXA-1, TEM-1B</i>                                                                                                                                                                 | -                                                                                                                          |
| <i>G702R3B2</i>          | <i>South Africa</i>  | <i>2016</i> | <i>ST152</i>              | <i>CTX-M-15, OXA-1, TEM-1B, aadA16, aac(6')-Ib-cr, aac(3')II-a, aph(6)-IId, aph(3')-Ib, sul1, sul2, tetA, tetB, tetD, dfrA14, dfrA27, oqxA, oqxB, catA1, catB4, fosA, arr-3, gyrA, parC</i>           | <i>IncFIB,</i><br><i>IncFII,</i><br><i>IncFII(k),</i><br><i>IncN,</i><br><i>IncQ1,</i><br><i>ColpVC,</i><br><i>ColRNAI</i> |
| <i>KP33 (This study)</i> | <i>South Africa</i>  | <i>2018</i> | <i>ST39</i>               | <i>NDM-1, OXA-1, CTX-M-15, SHV-40, SHV-56, SHV-79, SHV-85, SHV-89, TEM-1B, aac(6')-Ib-cr, aph(3')-Ib, aph(6)-IId, rmtC, aac(6')-Ib-cr, oqxA, oqxB, qnrB1, tet(A), fosA, catB3, dfrA14, sul1, sul2</i> | <i>IncFIB (k),</i><br><i>IncFII (k),</i><br><i>IncFII (yp)</i>                                                             |

**Supplementary data 3: Intact phages identified in carbapenem-resistant *K. pneumoniae* clinical isolates**

| <i>Phage identified</i>                       | <i>GC%</i> | <i>No CDS</i> | <i>Length (kb)</i> | <i>Isolates</i>         |
|-----------------------------------------------|------------|---------------|--------------------|-------------------------|
| <i>PHAGE_Salmon_SEN5_NC_028701(21)</i>        | 54.79      | 49            | 37.7               | <i>Kp8, Kp15, Kp29</i>  |
| <i>PHAGE_Salmon_Fels_2_NC_010463(33)</i>      | 51.82      | 42            | 41.5               | <i>Kp8, Kp32</i>        |
| <i>PHAGE_Cronob_ENT47670_NC_019927(12)</i>    | 53.15      | 71            | 49.1               | <i>Kp8</i>              |
| <i>PHAGE_Salmon_SPN3UB_NC_019545(12)</i>      | 52.02      | 68            | 55.6               | <i>Kp8</i>              |
| <i>PHAGE_Salmon_118970_sal3_NC_031940(11)</i> | 50.44      | 44            | 39.8               | <i>Kp8, Kp15</i>        |
| <i>PHAGE_Salmon_SJ46_NC_031129(4)</i>         | 52.78      | 27            | 40.5               | <i>Kp8</i>              |
| <i>PHAGE_Klebsi_phiK02_NC_005857(43)</i>      | 51.45      | 70            | 54.7               | <i>Kp8</i>              |
| <i>PHAGE_Enteroc_mEp237_NC_019704(10)</i>     | 52.26      | 67            | 56.4               | <i>Kp33, Kp10, Kp29</i> |
| <i>PHAGE_Edward_GF_2_NC_026611(21)</i>        | 52.58      | 70            | 46.2               | <i>Kp33, Kp10</i>       |
| <i>PHAGE_Enteroc_P1_NC_005856(3)</i>          | 54.30      | 31            | 16.5               | <i>Kp33, Kp10</i>       |
| <i>PHAGE_Escher_RCS47_NC_042128(3)</i>        | 53.61      | 24            | 35.2               | <i>Kp15</i>             |
| <i>PHAGE_Escher_RCS47_NC_042128(5)</i>        | 53.99      | 34            | 27.1               | <i>Kp15, Kp29</i>       |
| <i>PHAGE_Escher_phiV10_NC_007804(33)</i>      | 50.84      | 59            | 59.9               | <i>Kp15</i>             |
| <i>PHAGE_Salmon_RE_2010_NC_019488(32)</i>     | 53.71      | 45            | 37.4               | <i>Kp29</i>             |
| <i>PHAGE_Pectob_ZF40_NC_019522(14)</i>        | 50.21      | 56            | 48.1               | <i>Kp29</i>             |
| <i>PHAGE_Phage_Gifsy_1_NC_010392(11)</i>      | 52.09      | 78            | 55.7               | <i>Kp32</i>             |
| <i>PHAGE_Salmon_SEN34_NC_028699(25)</i>       | 54.27      | 70            | 60.2               | <i>Kp32</i>             |
| <i>PHAGE_Staphy_SPbeta_like_NC_029119(3)</i>  | 54.40      | 29            | 25.5               | <i>Kp32</i>             |

**SUPPLEMENTARY  
FIGURES 1-14**





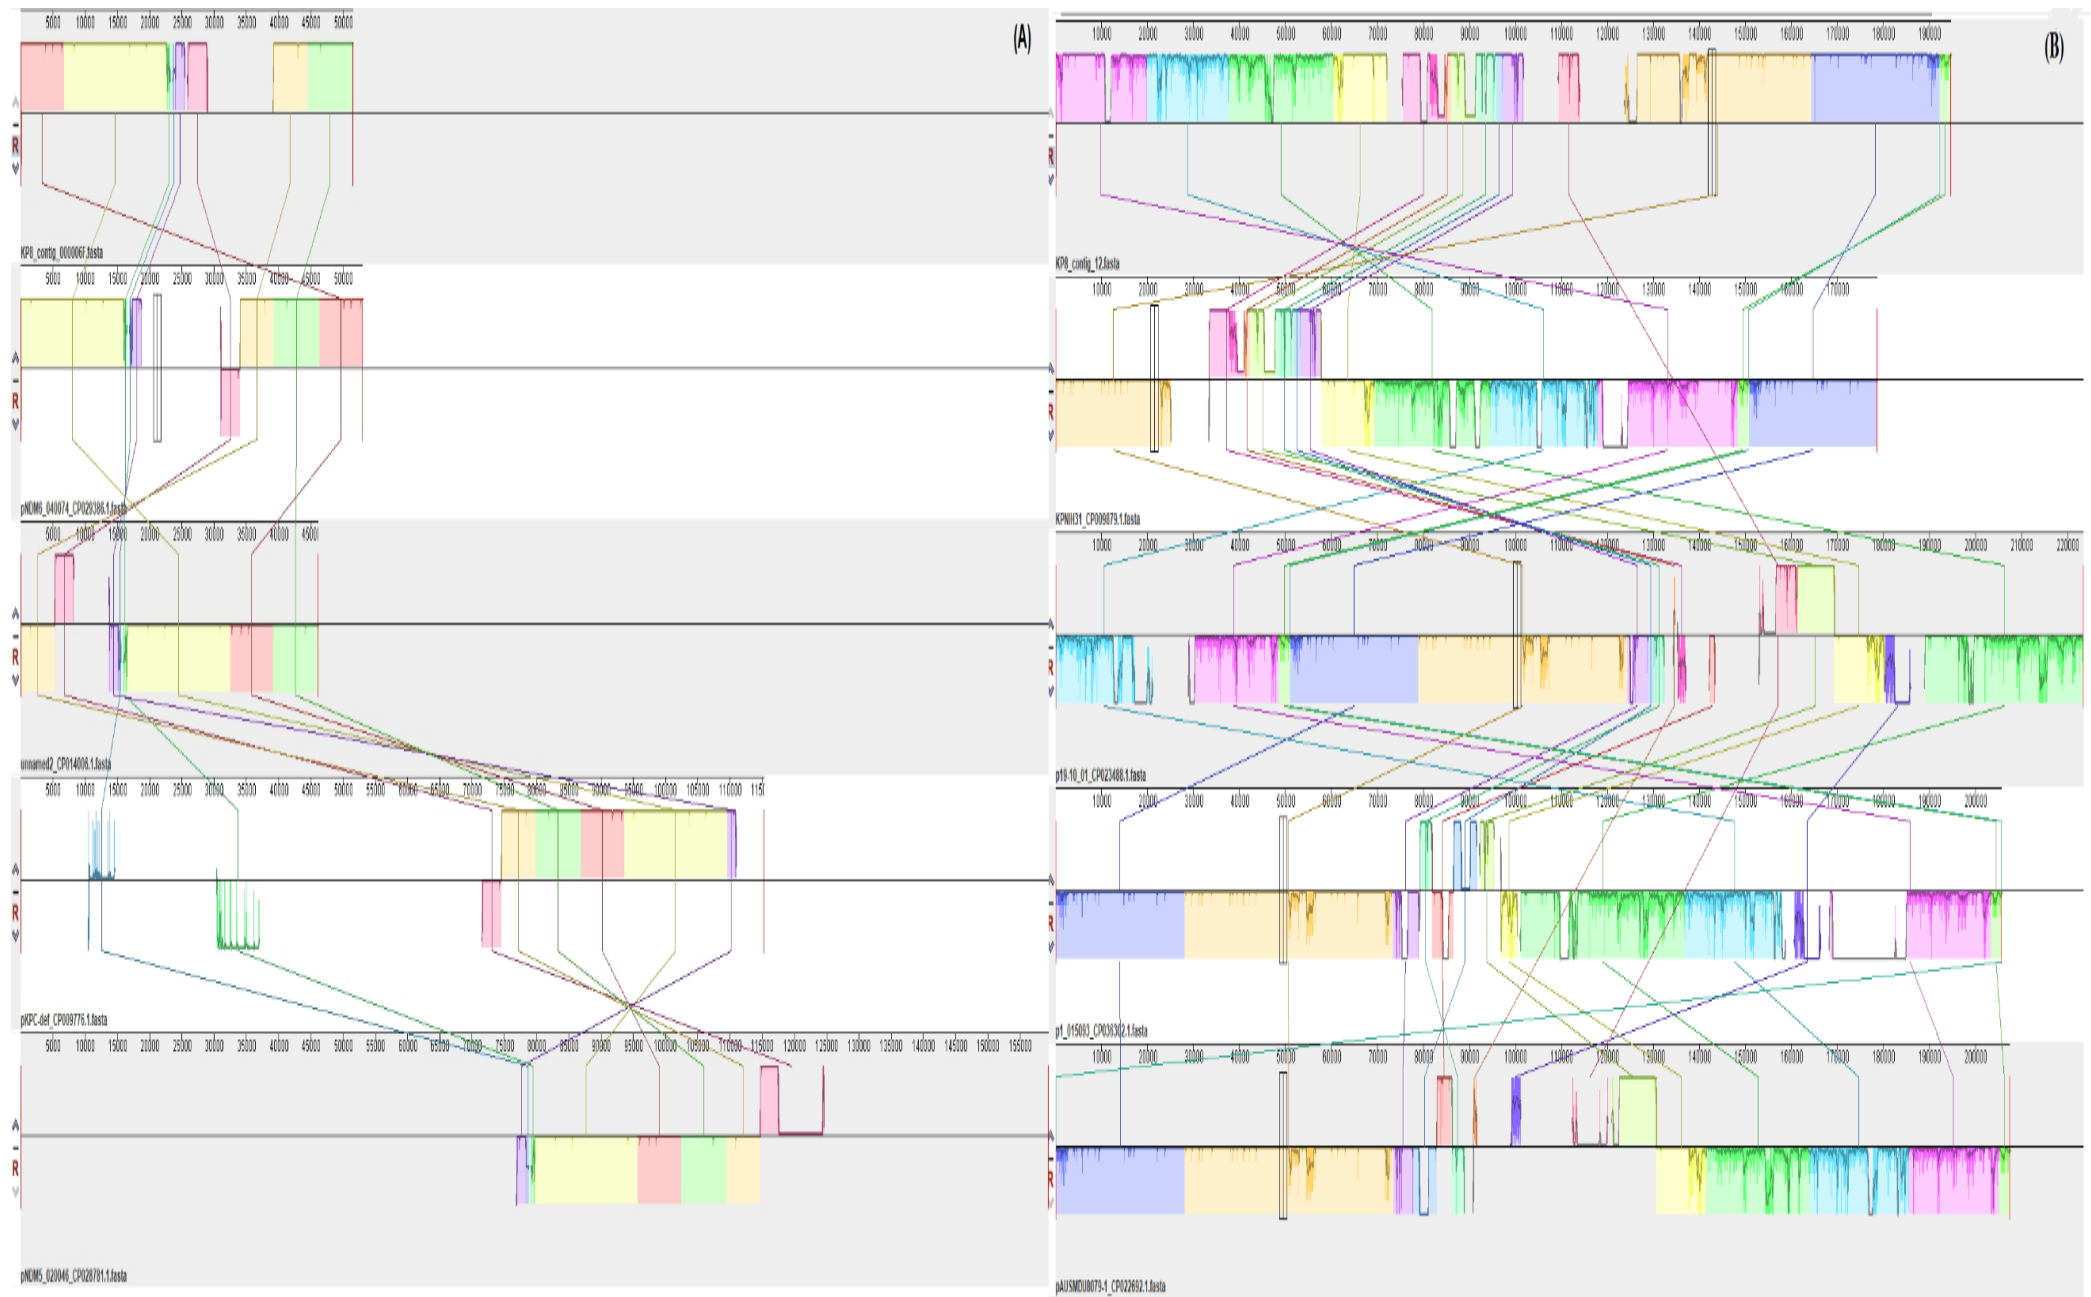

Figure S1.2



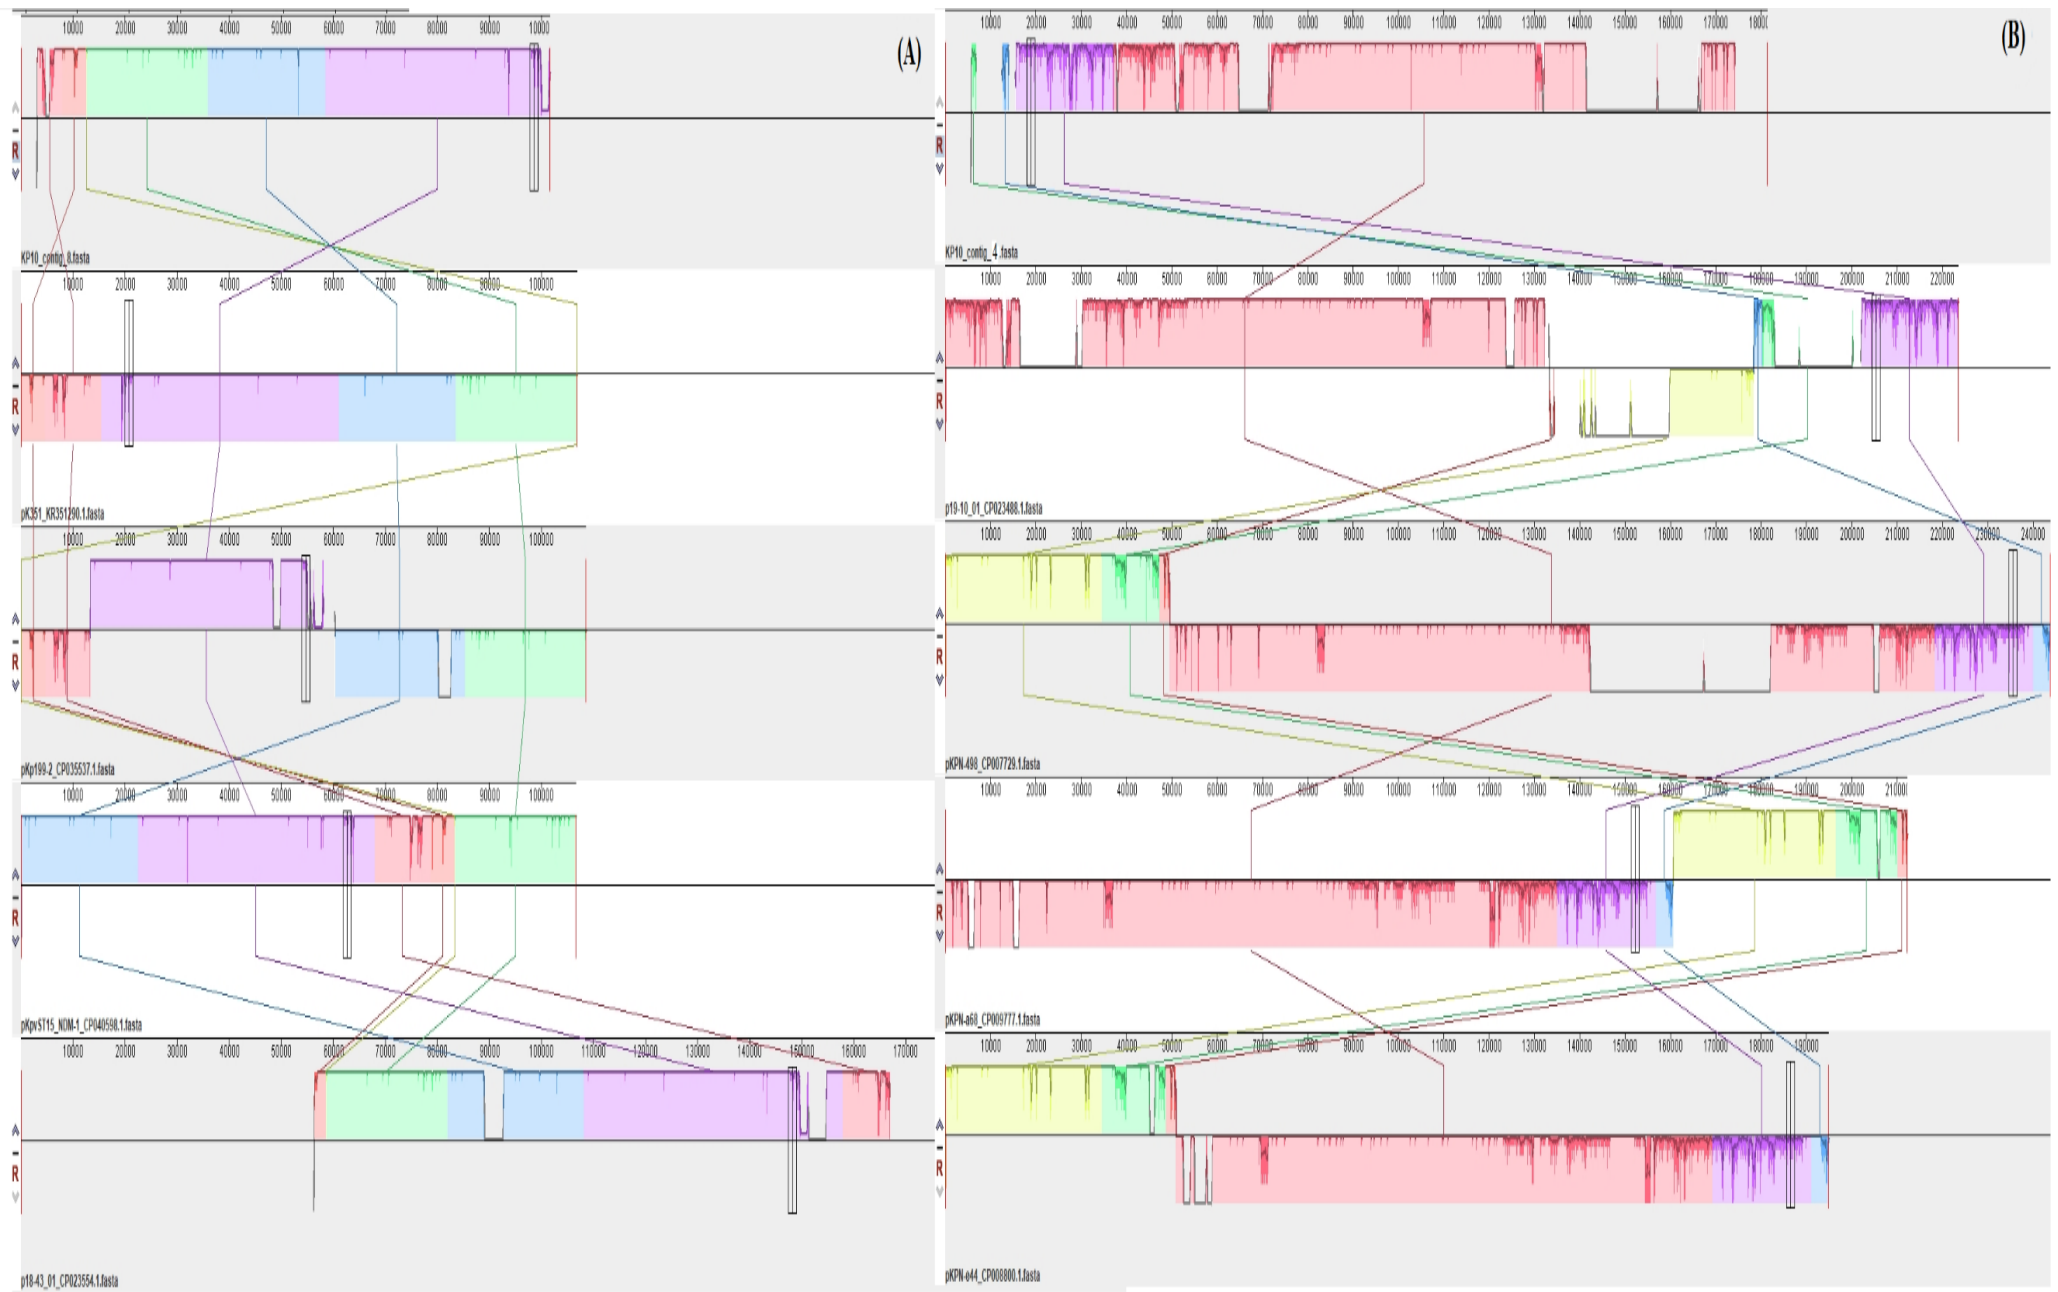

**Figure S2.2**



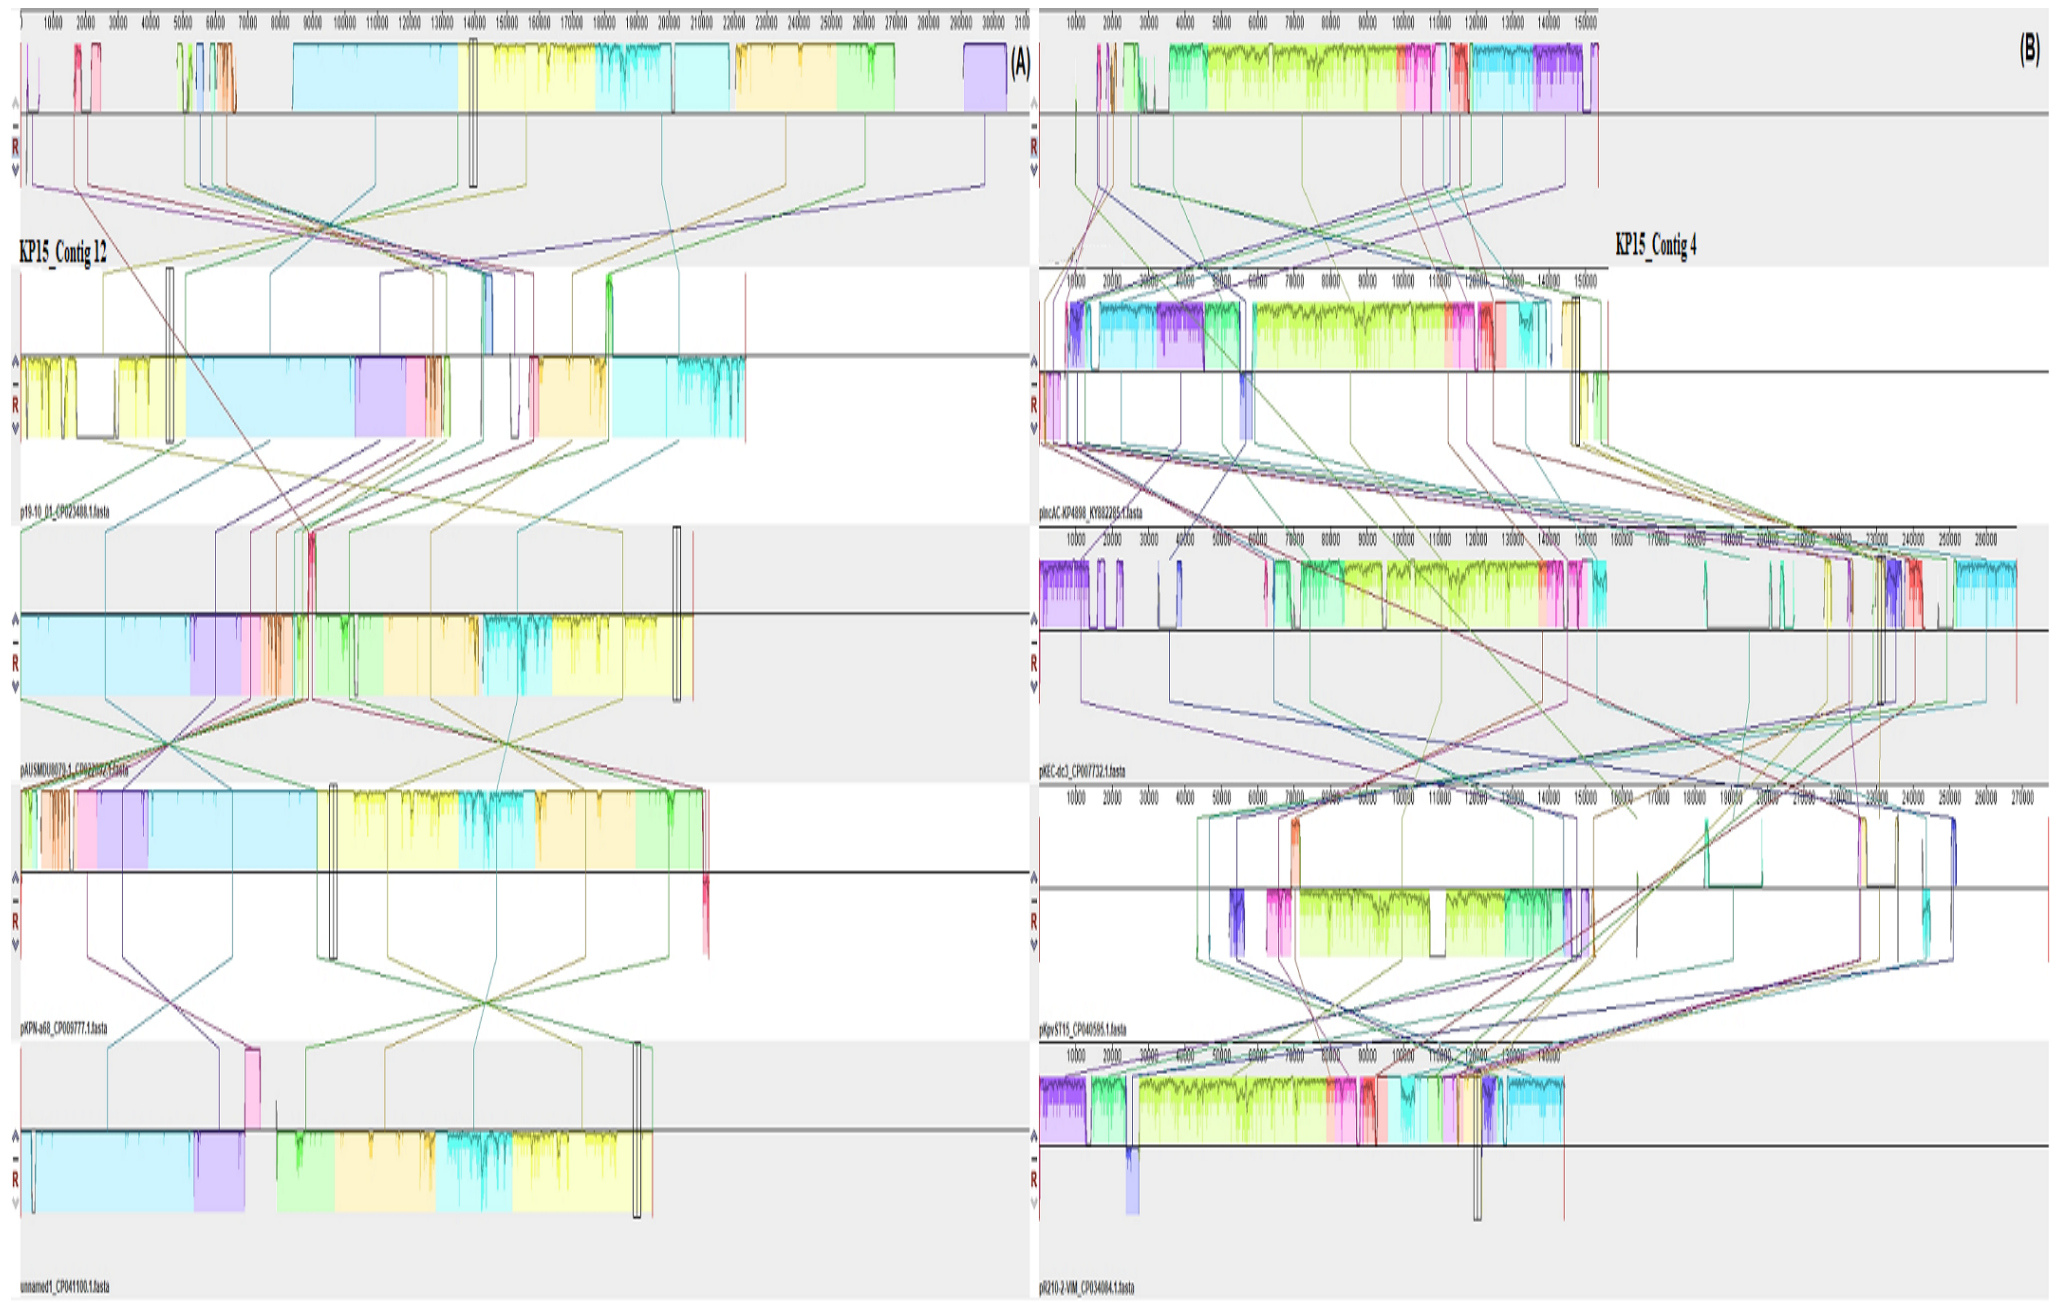

Figure S3.2







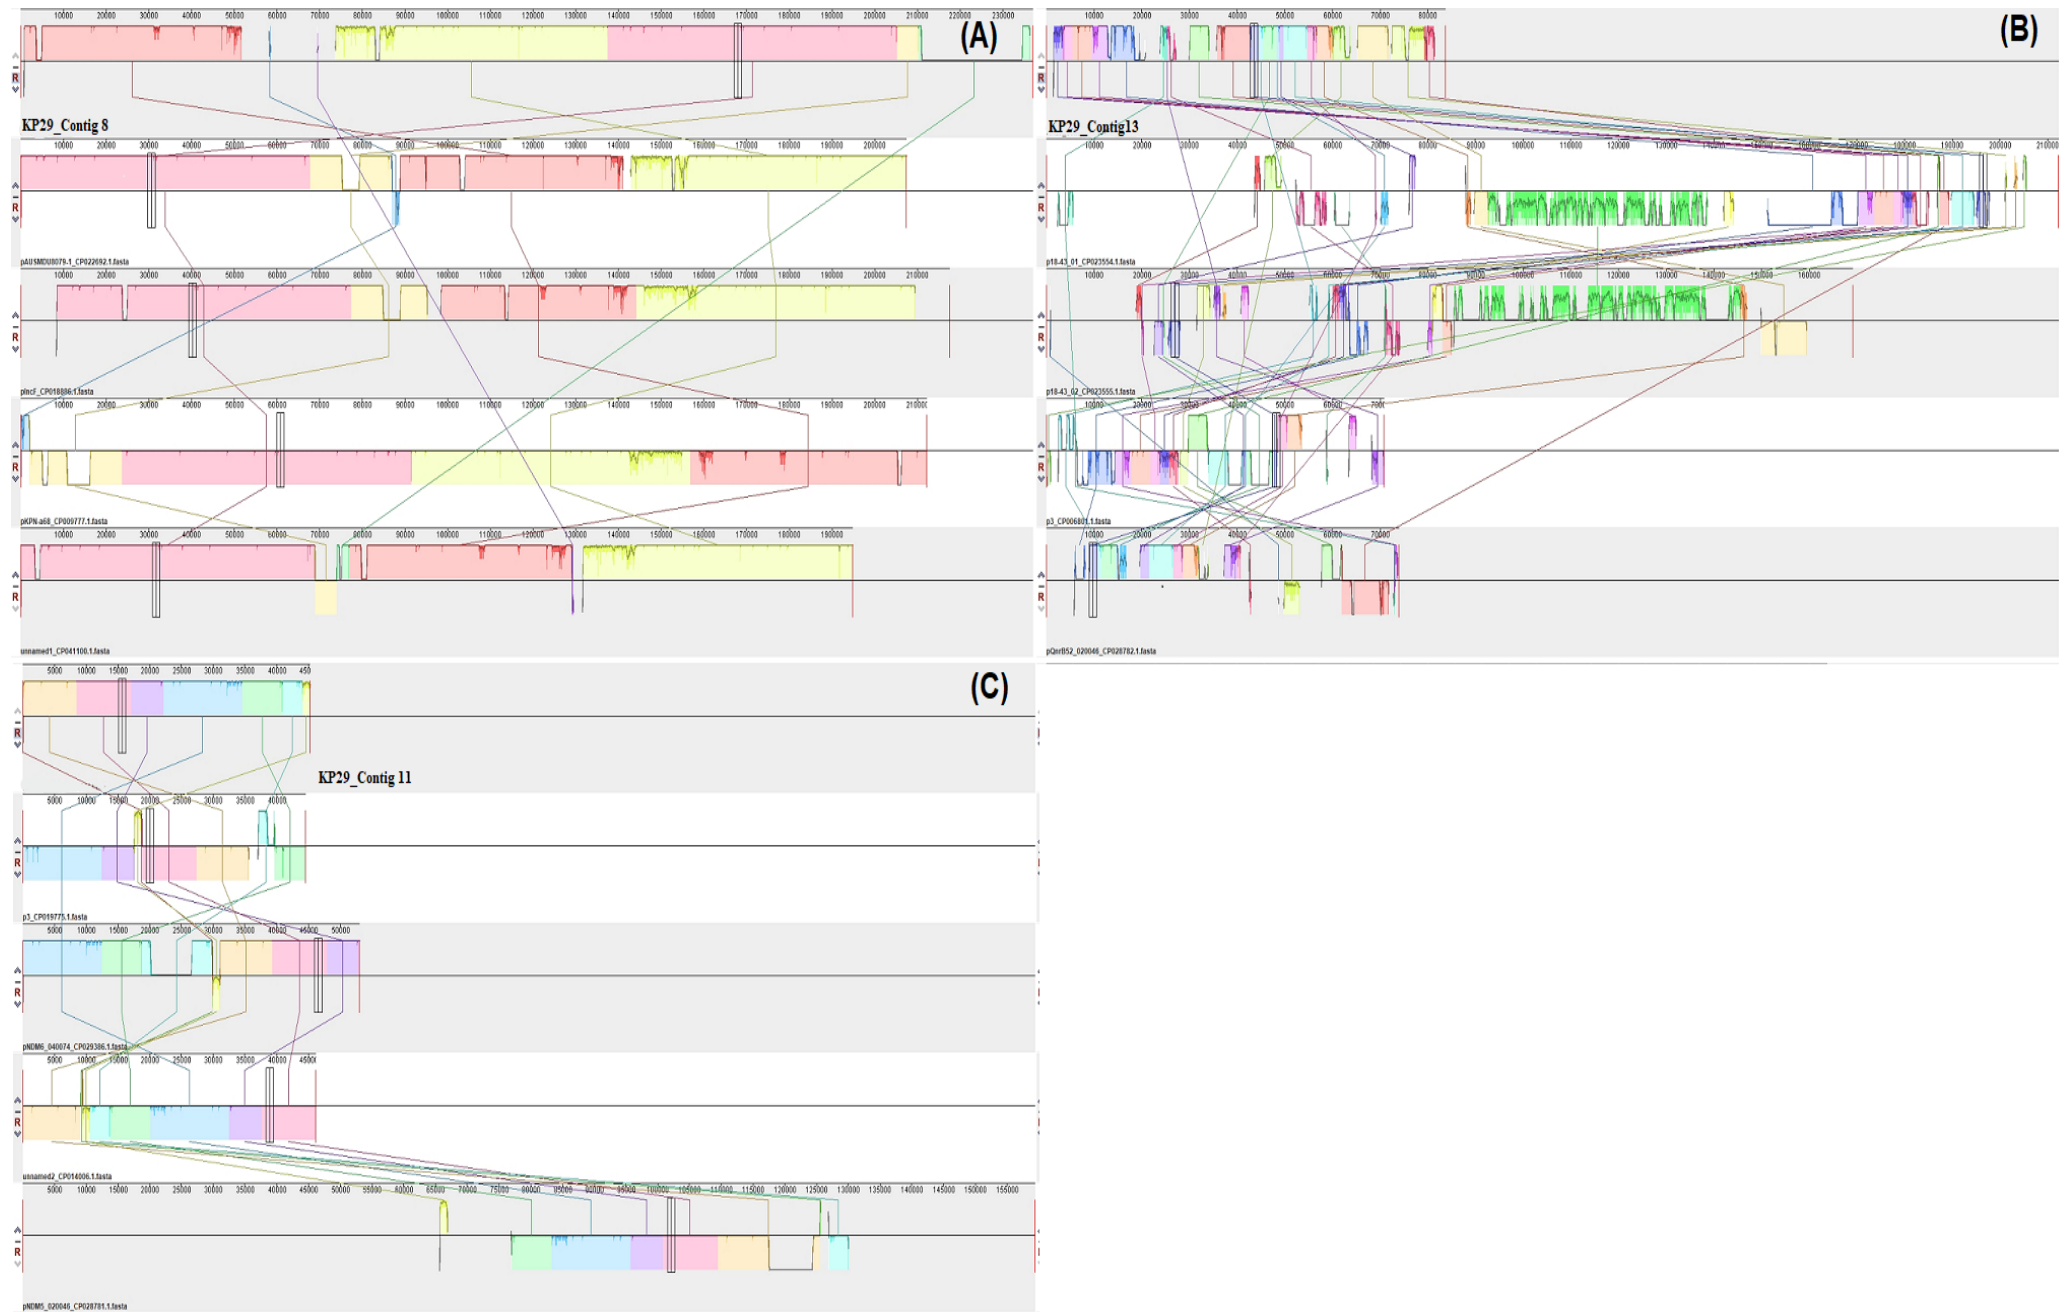

Figure S4.3





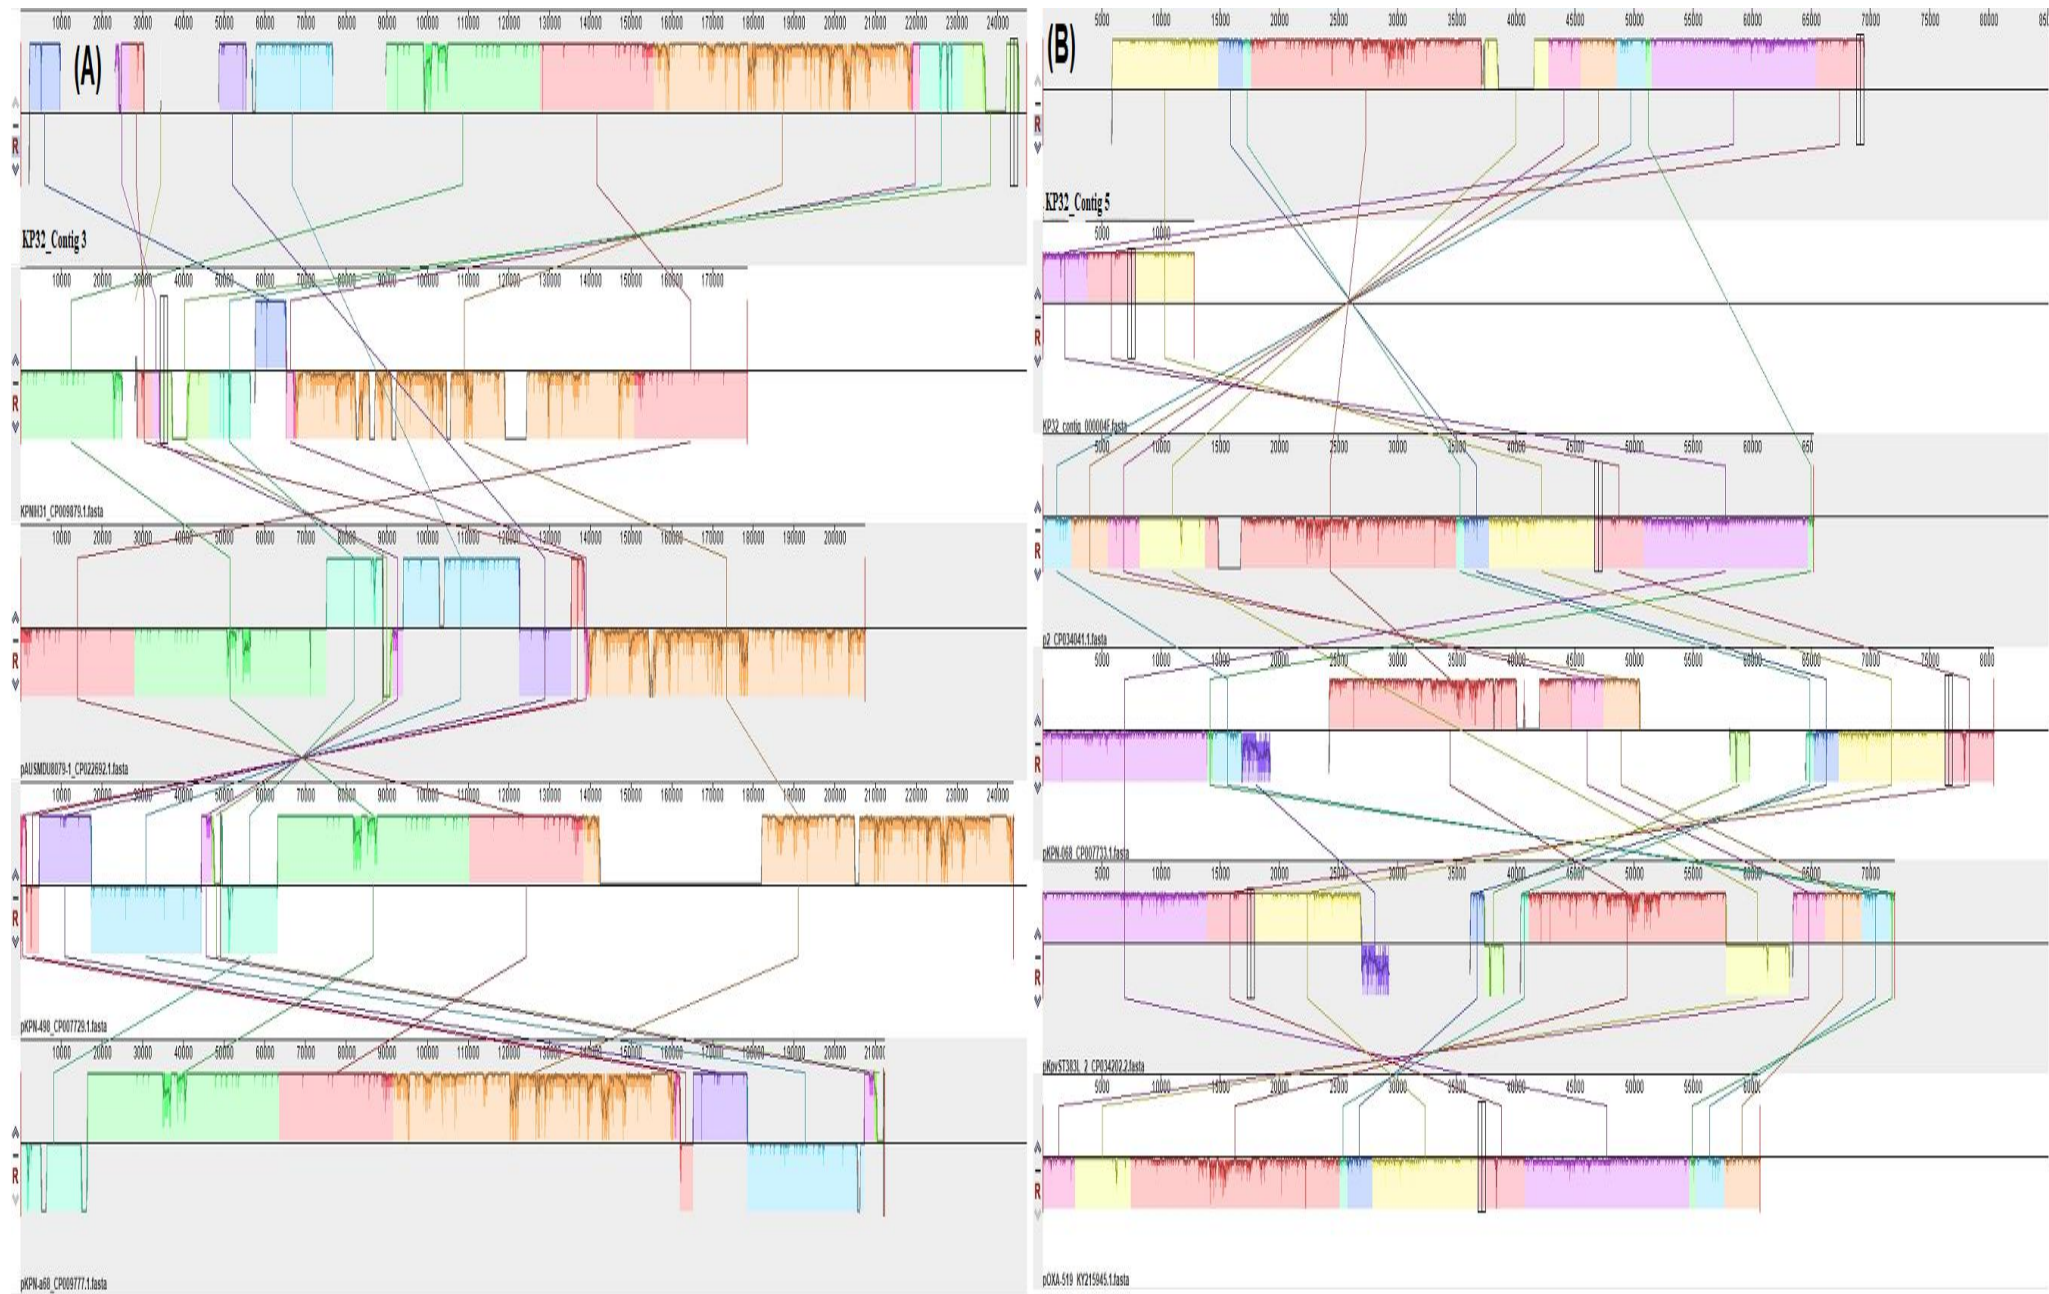

**Figure S5.2**

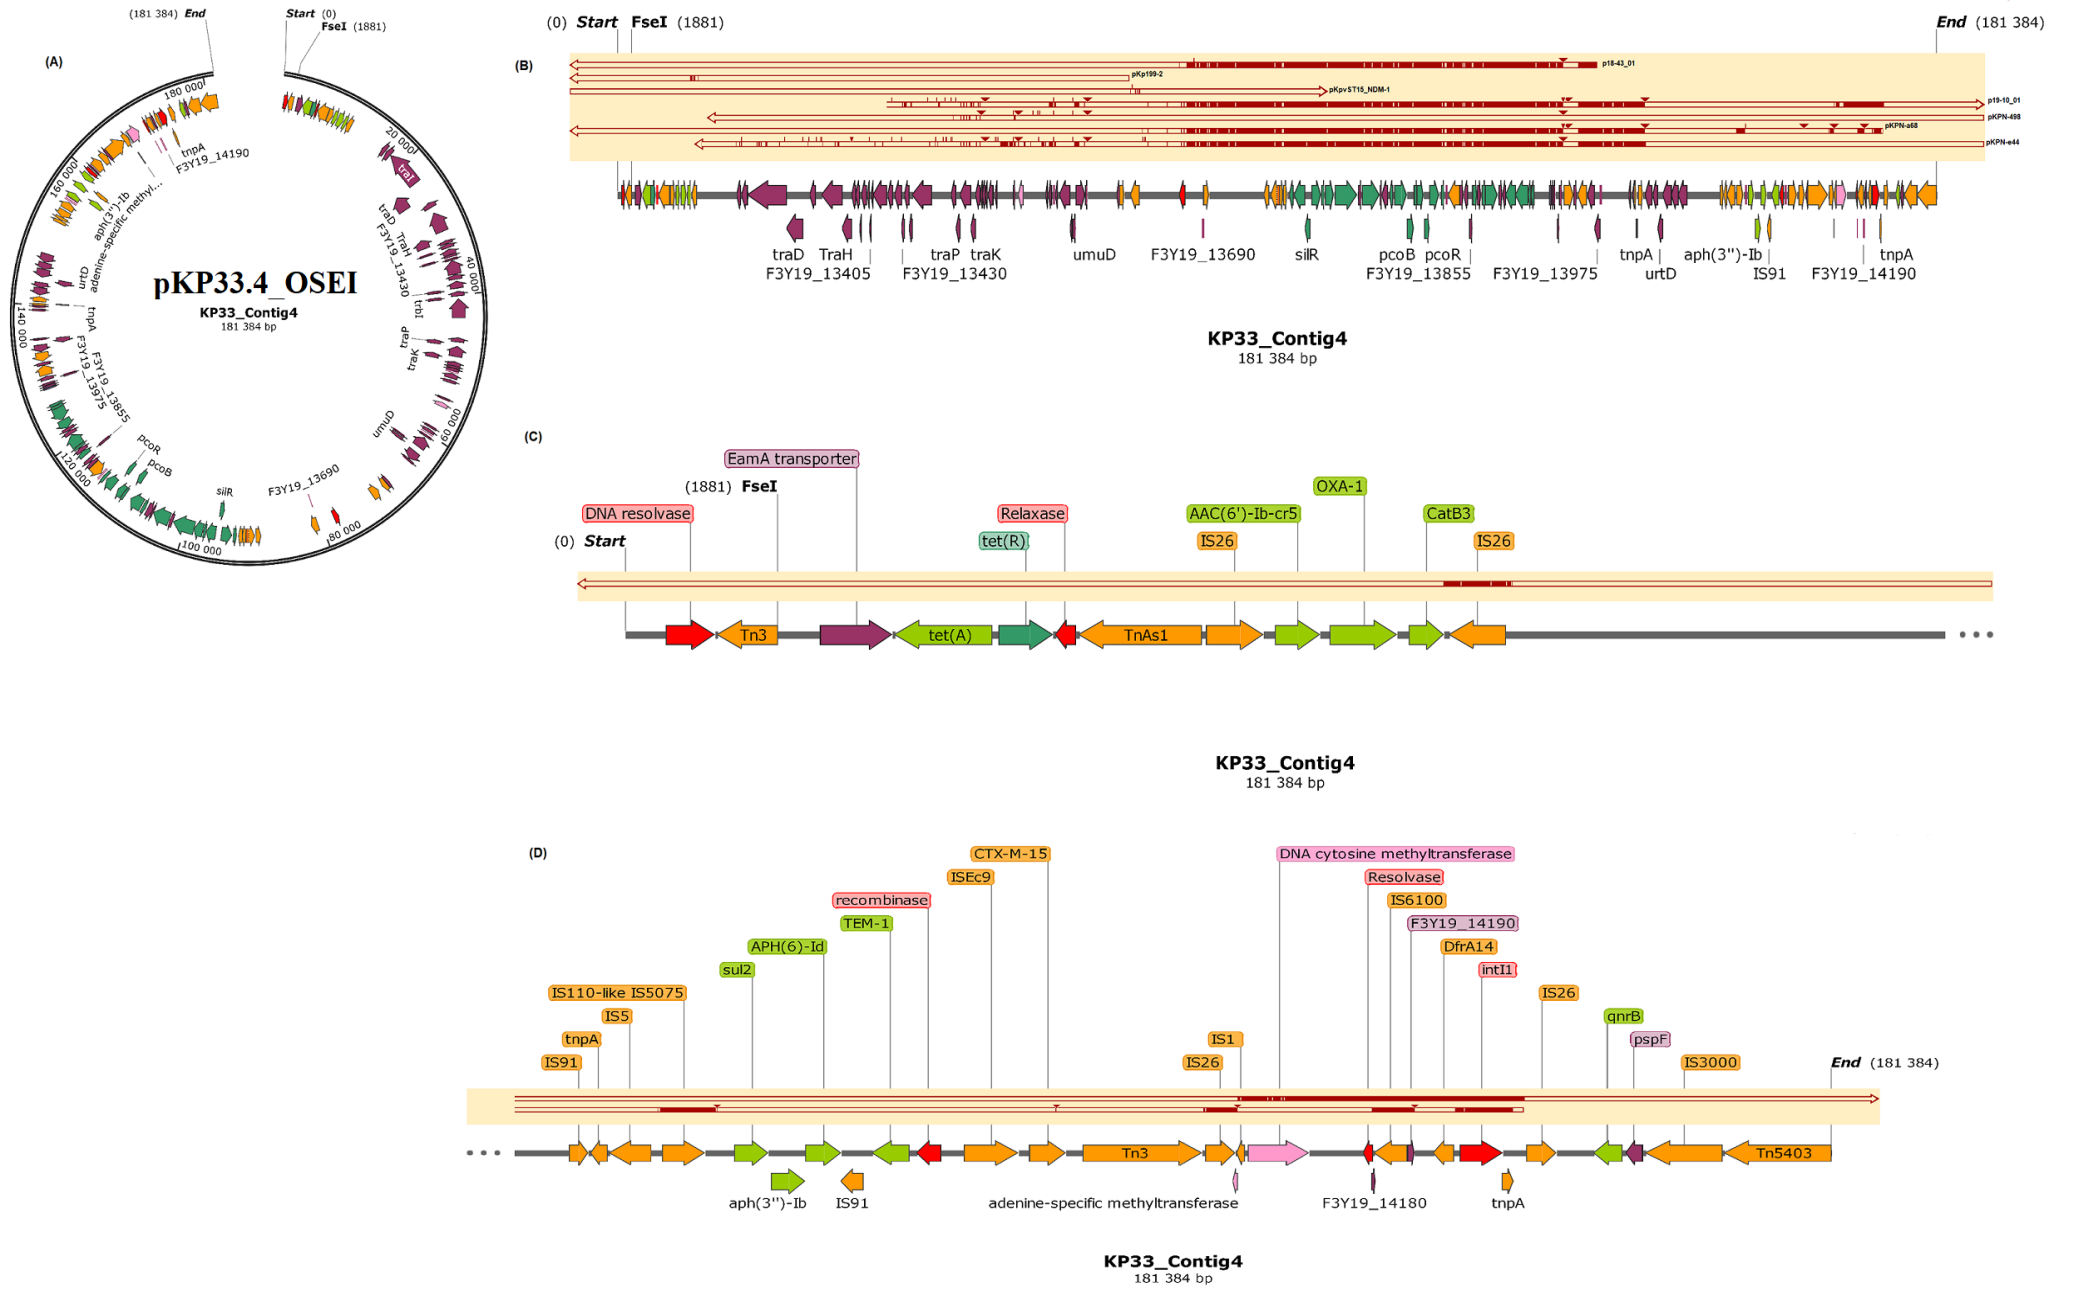

Figure S6.1

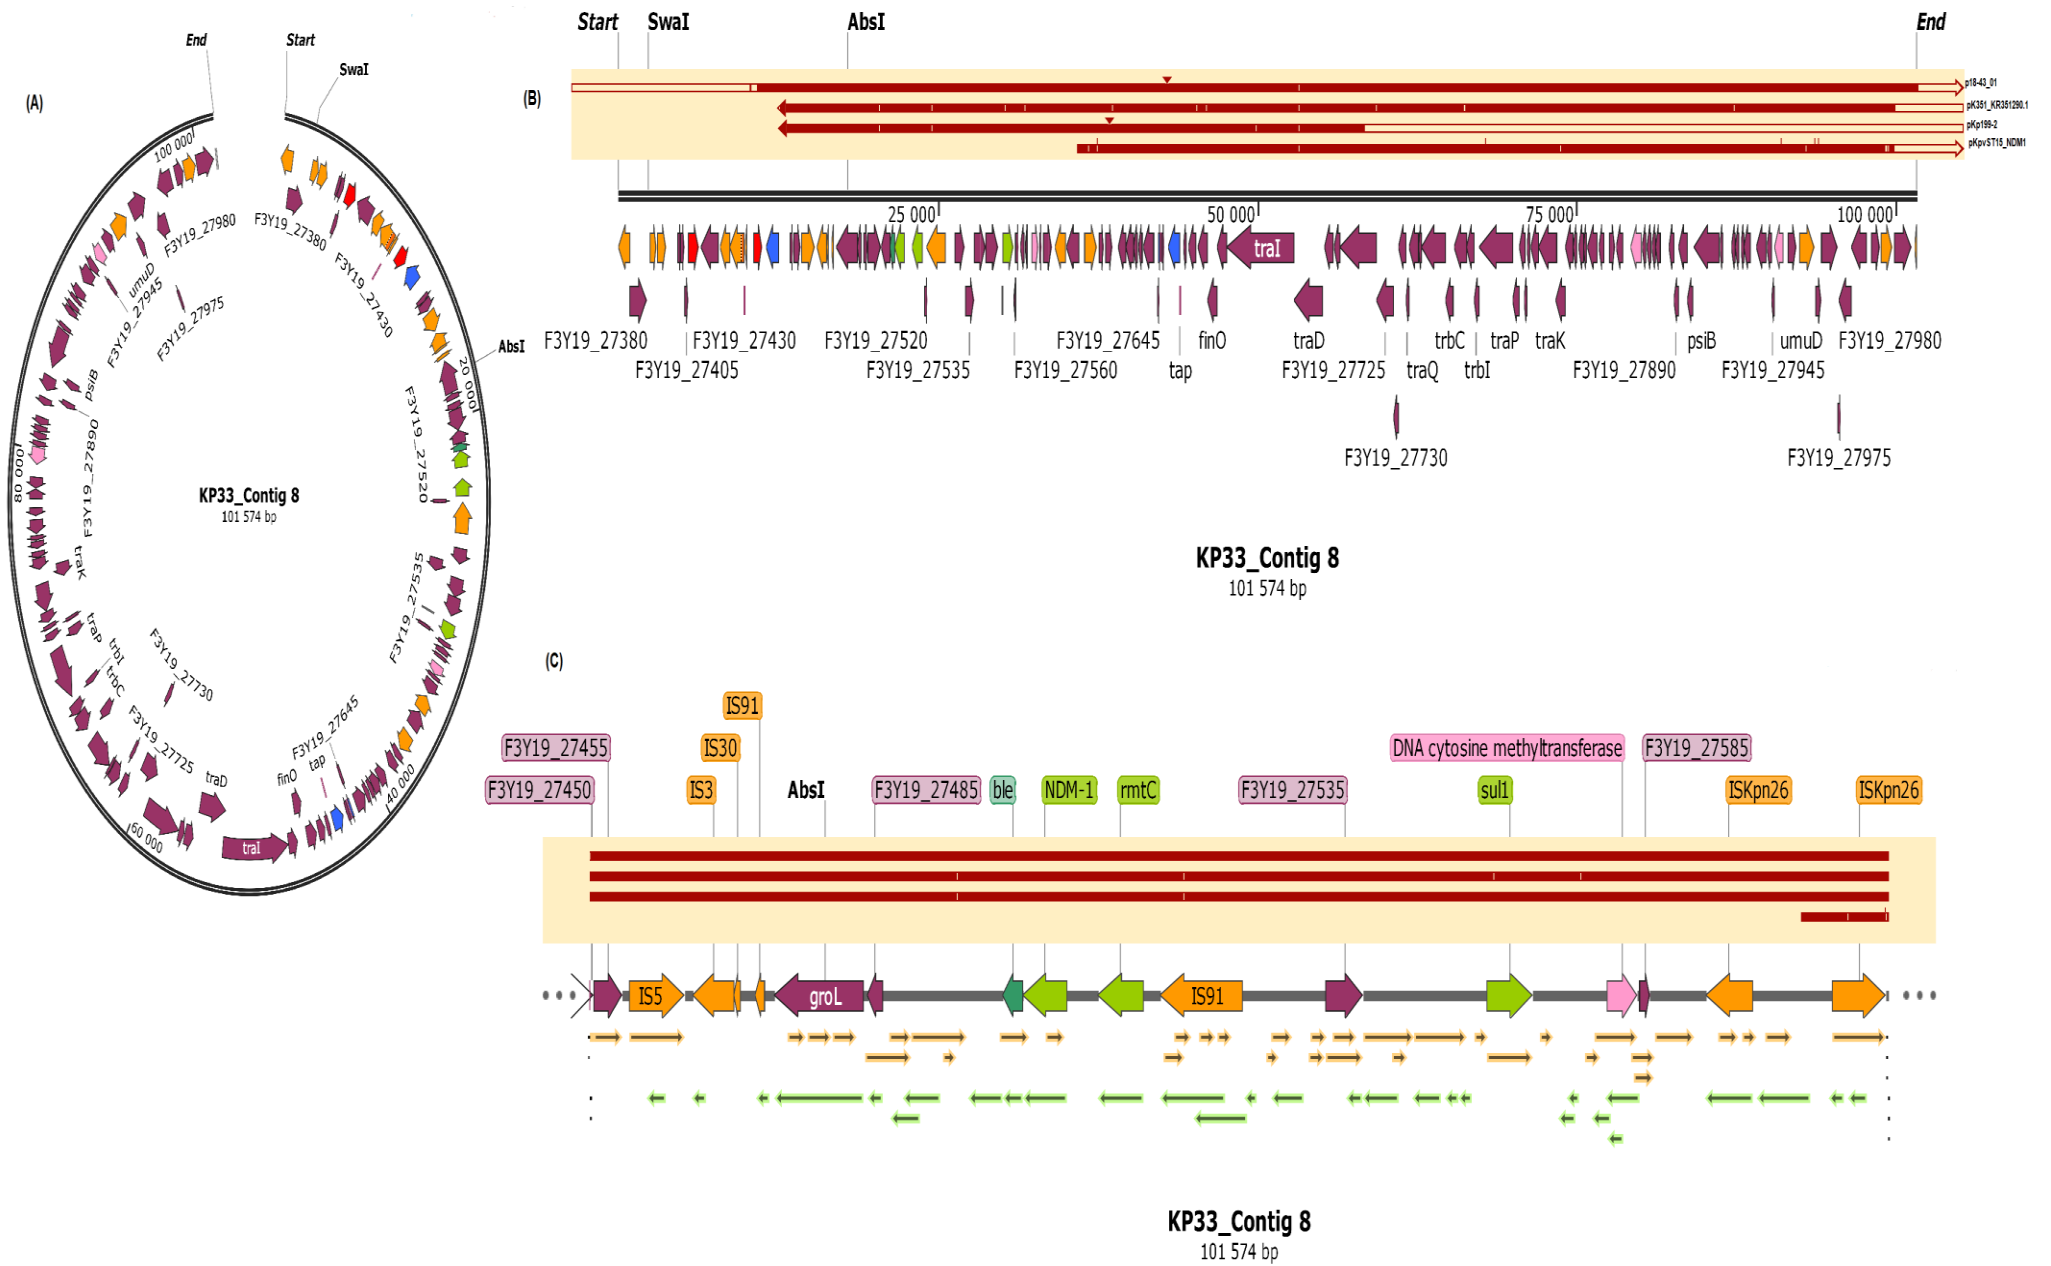

Figure S6.2

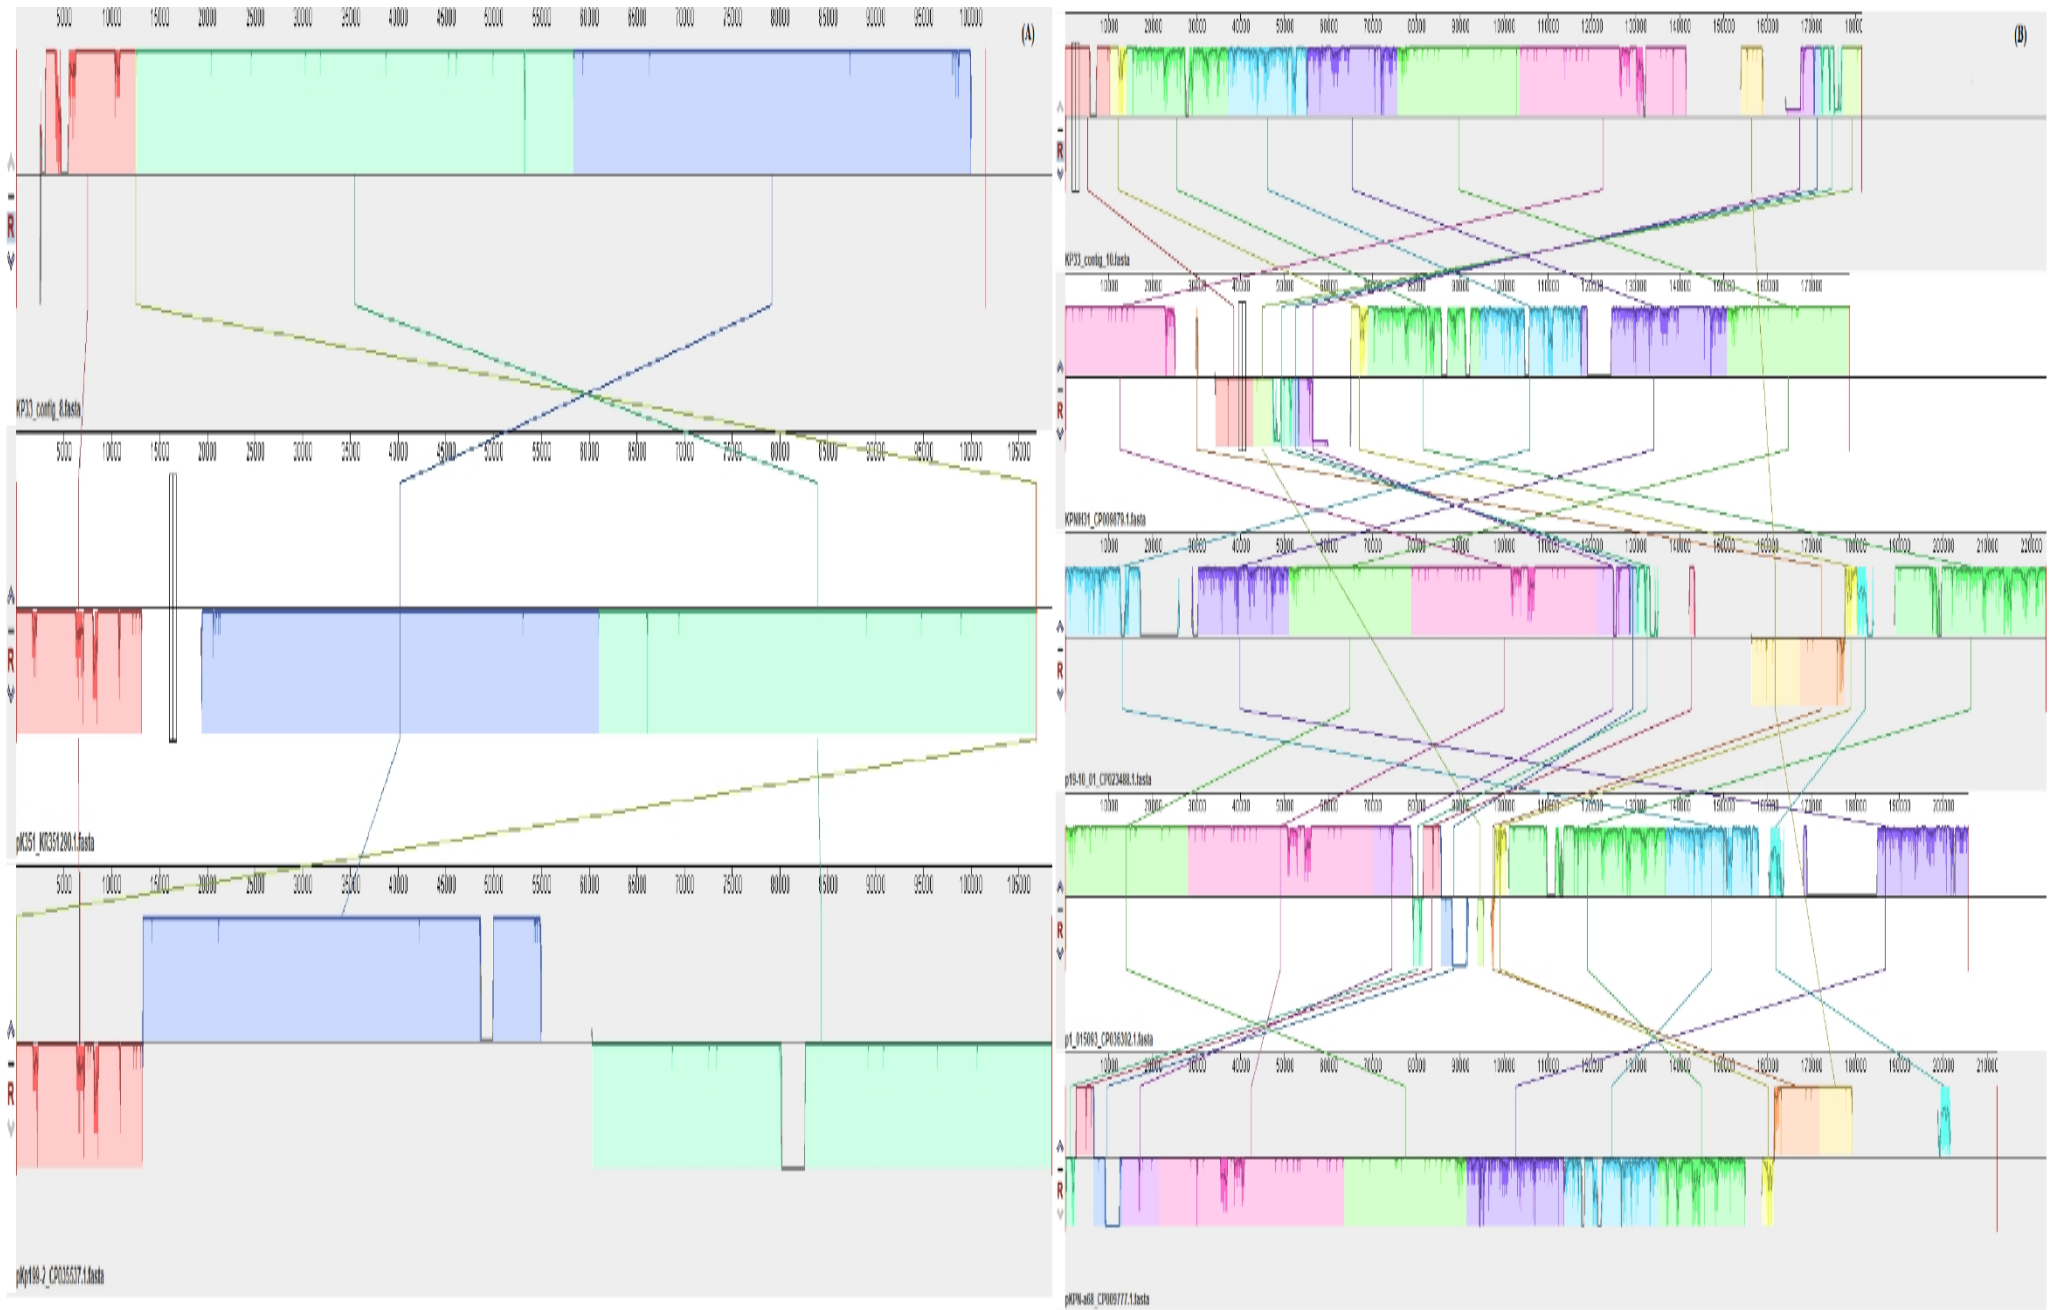

Figure S6.3



## KP8 contigs

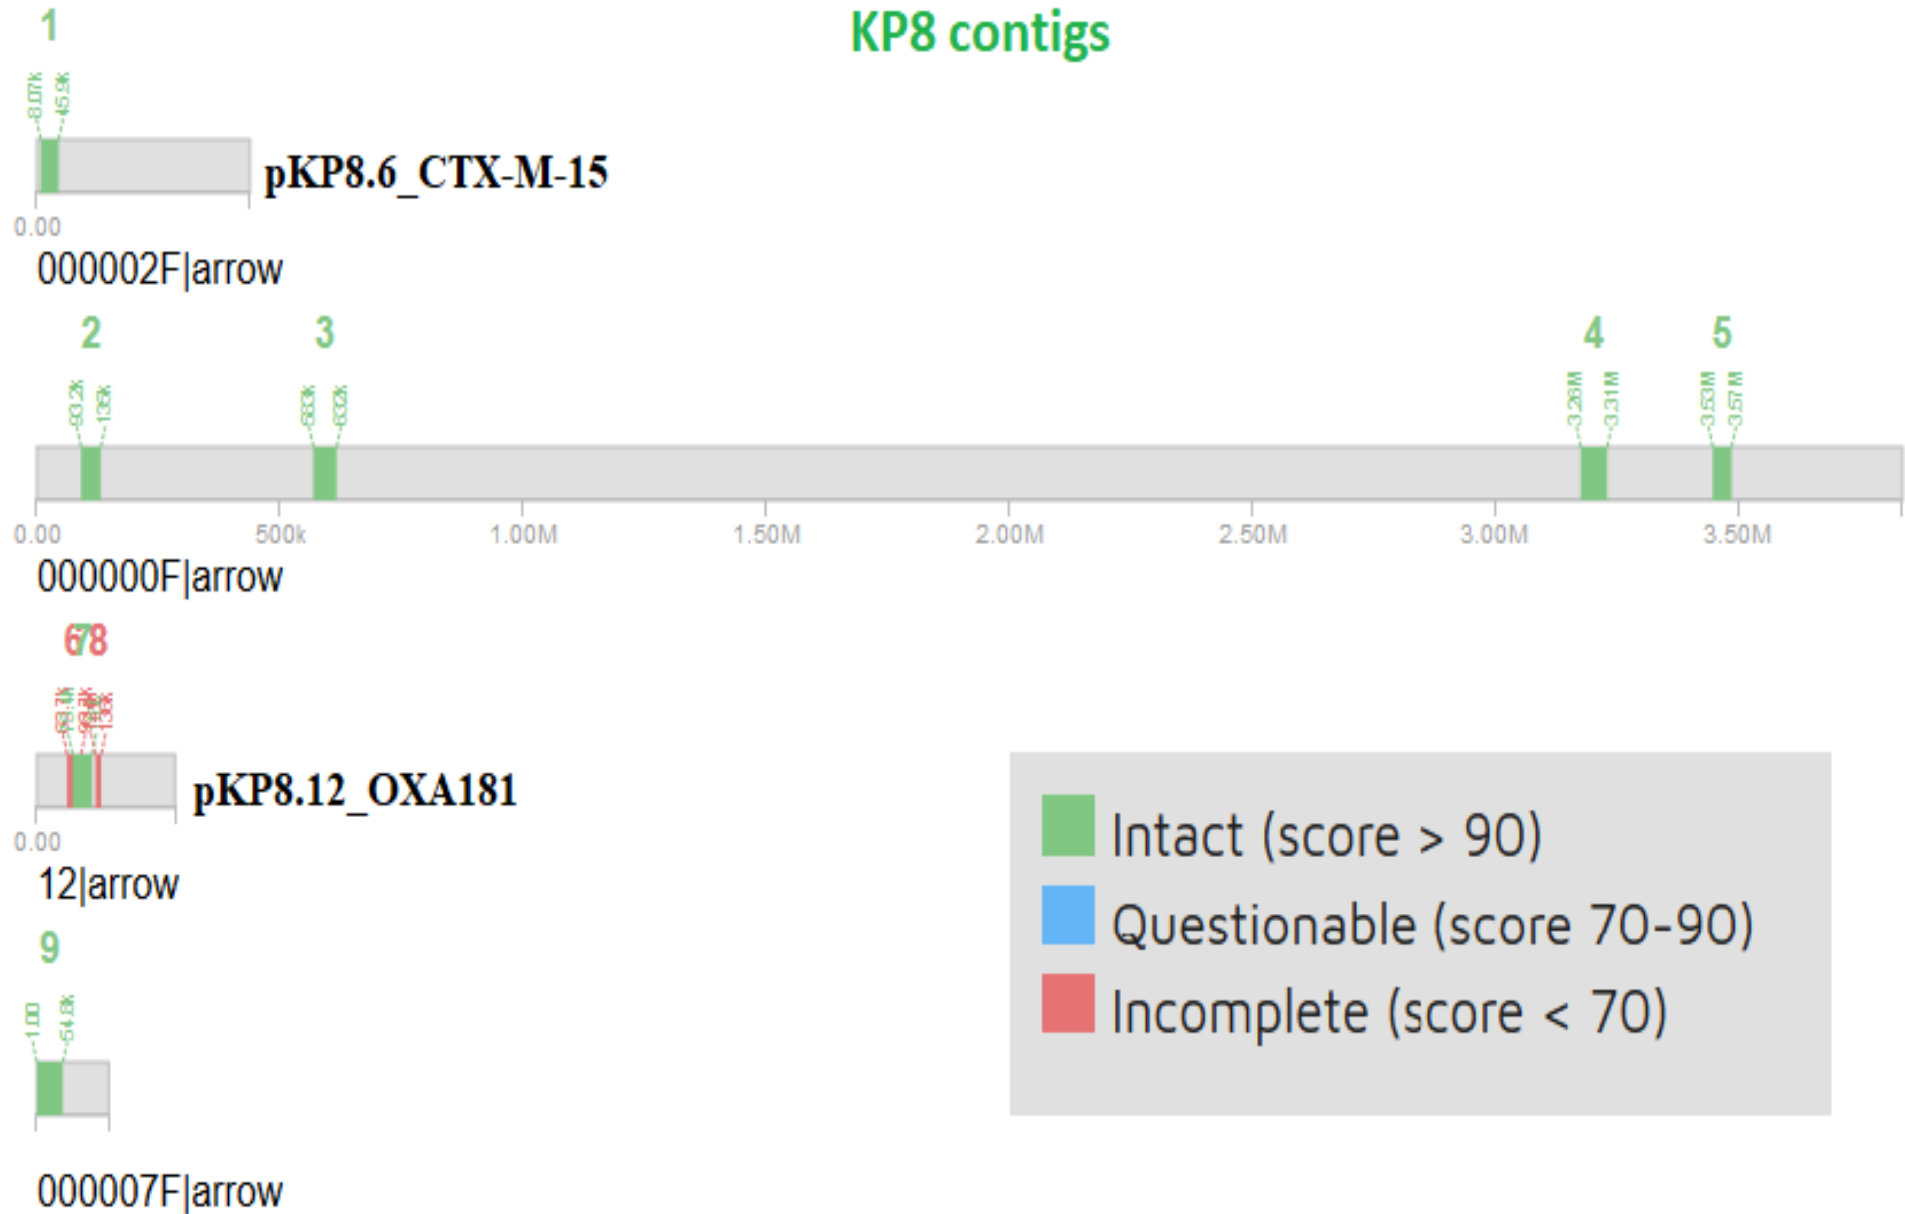

Figure S7.1

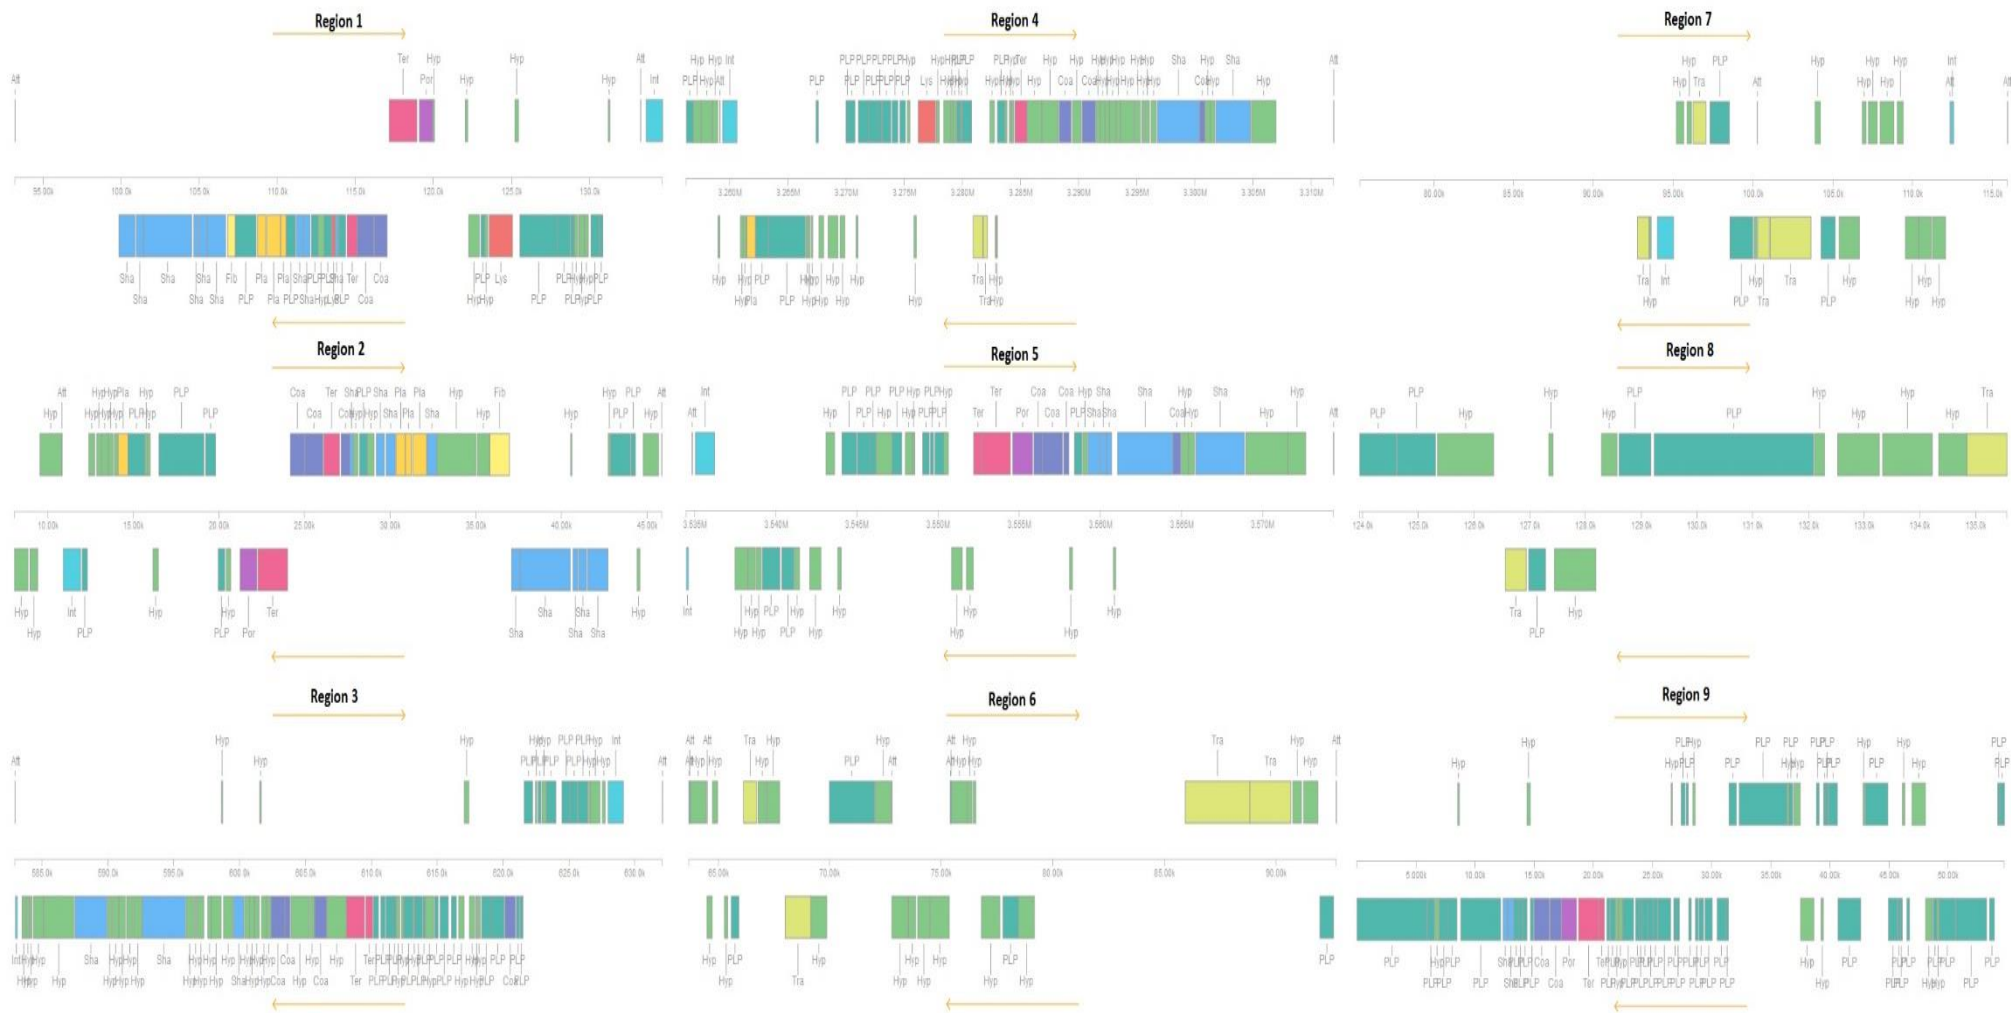

Figure S7.2

## KP10 contigs

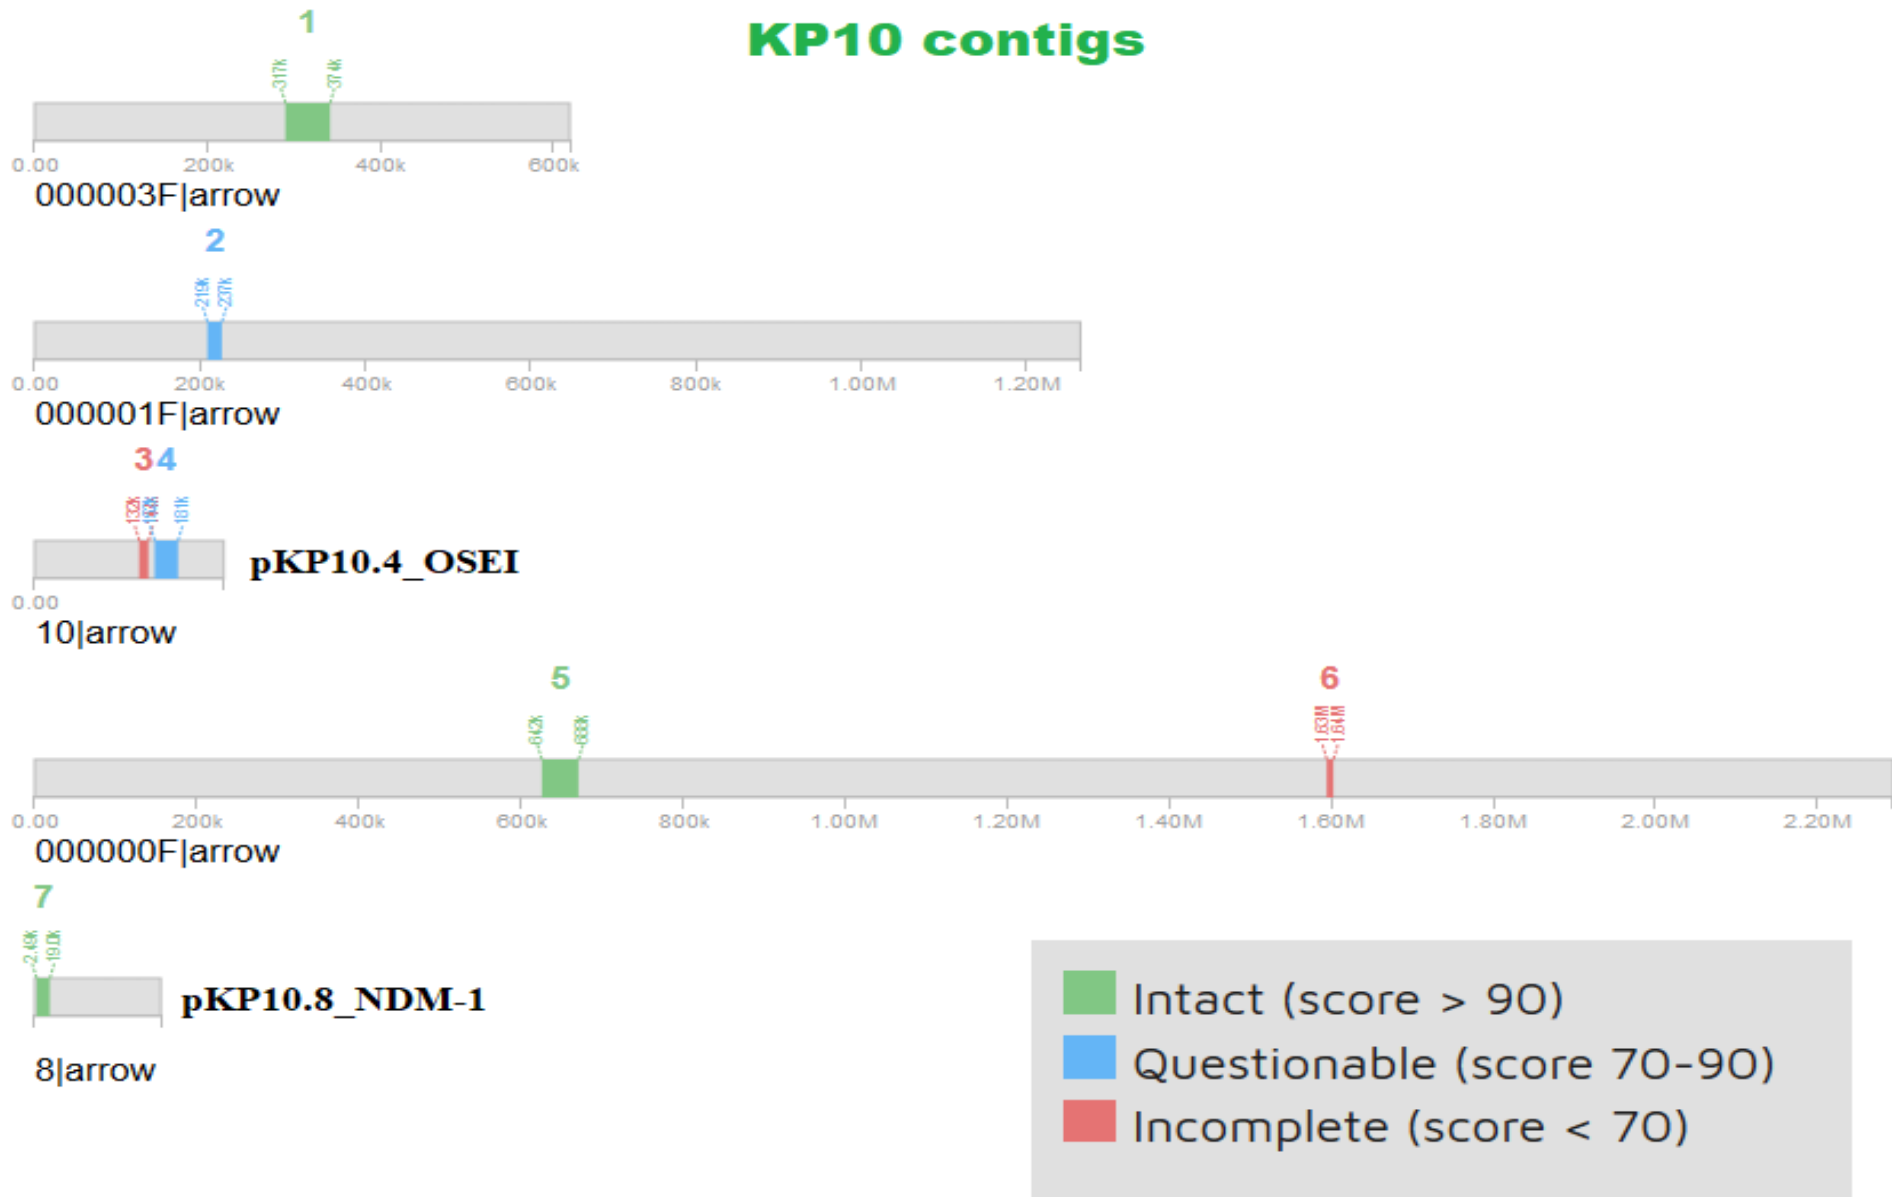

Figure S8.1



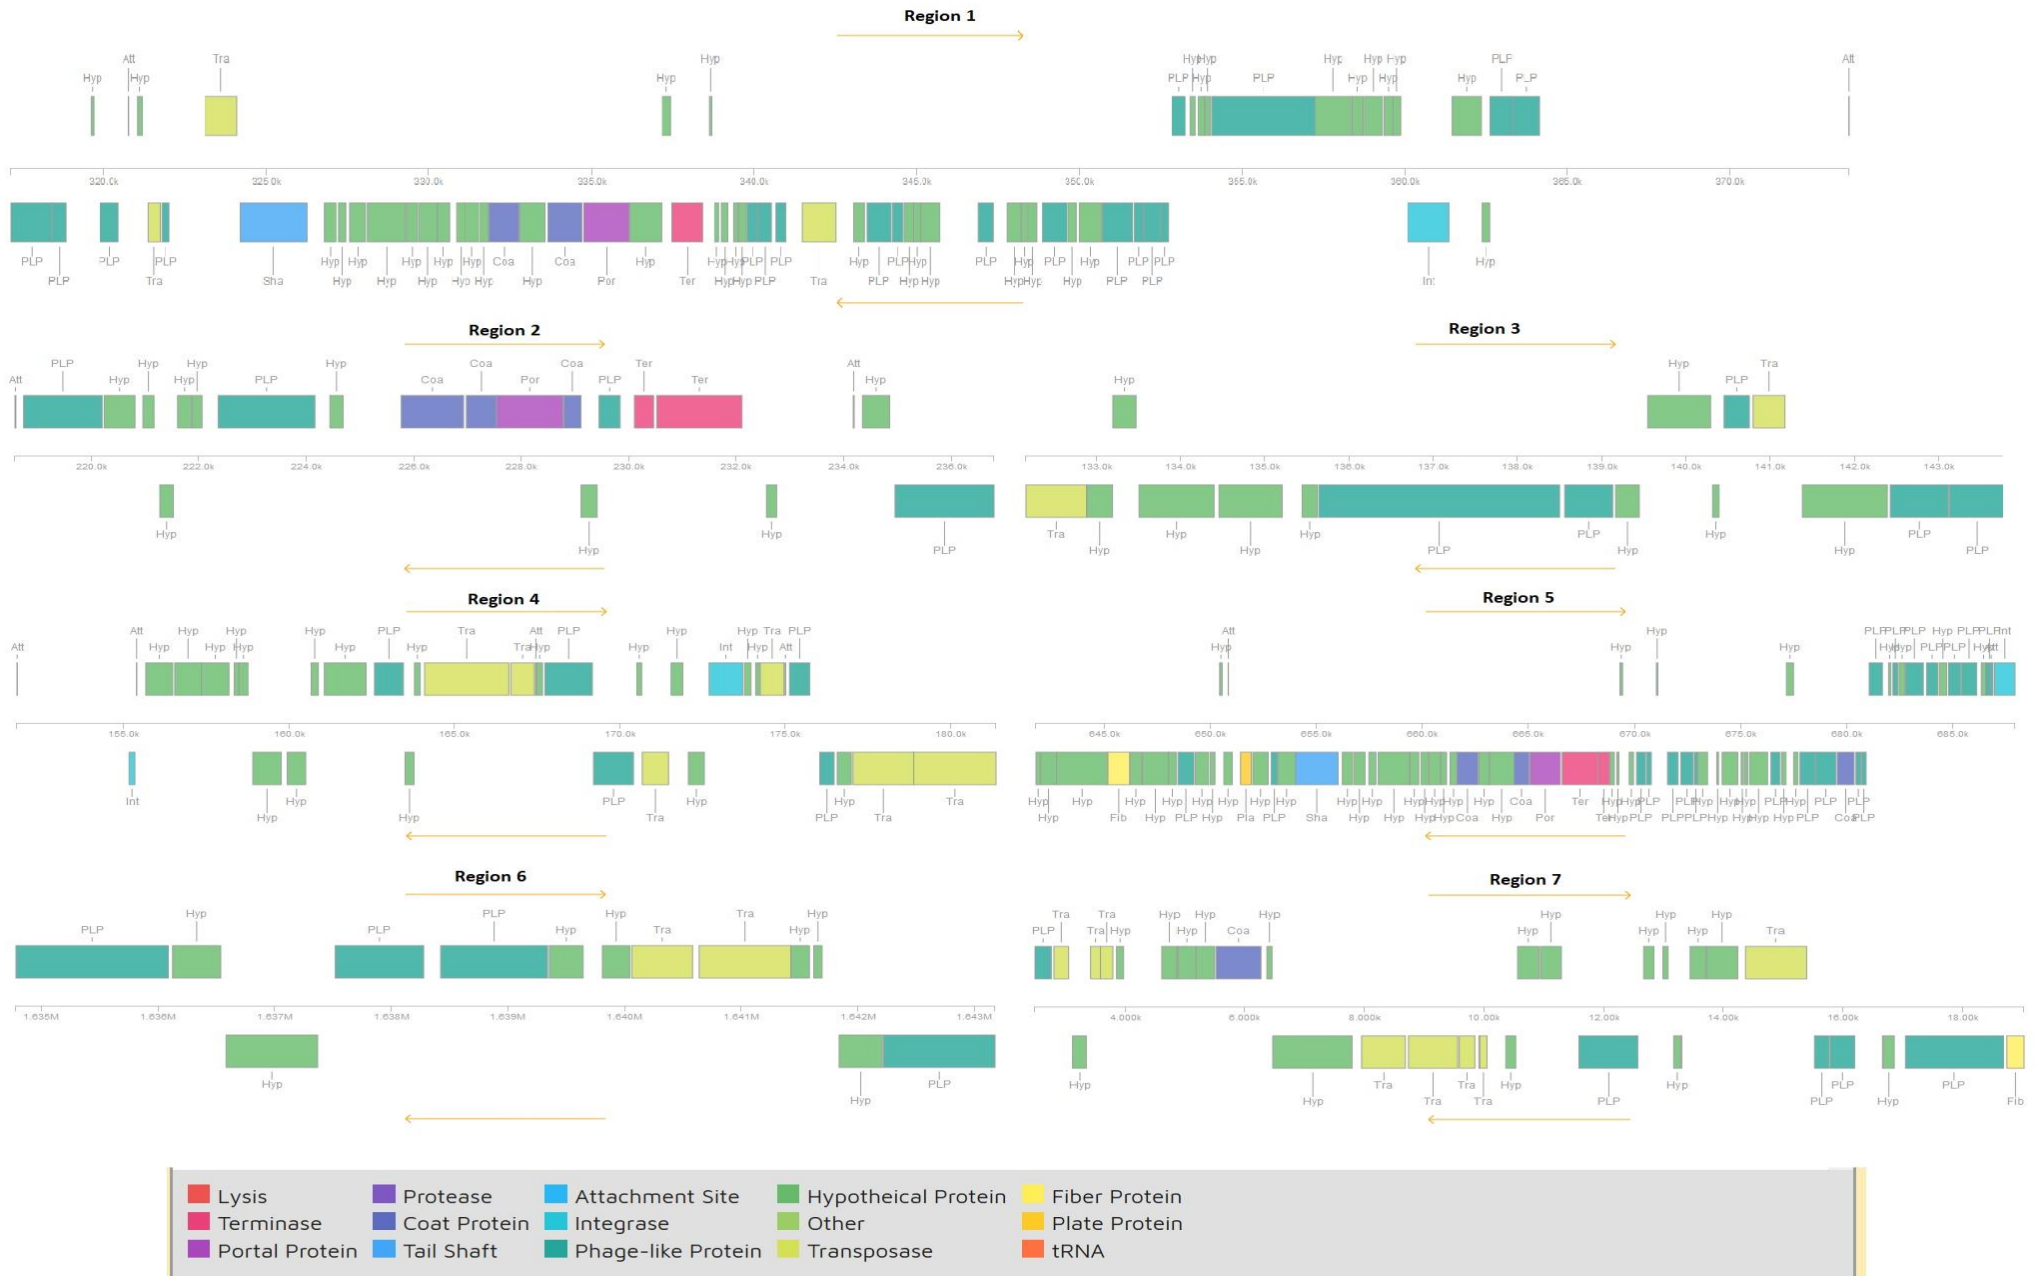

Figure S8.2

## KP15 contigs

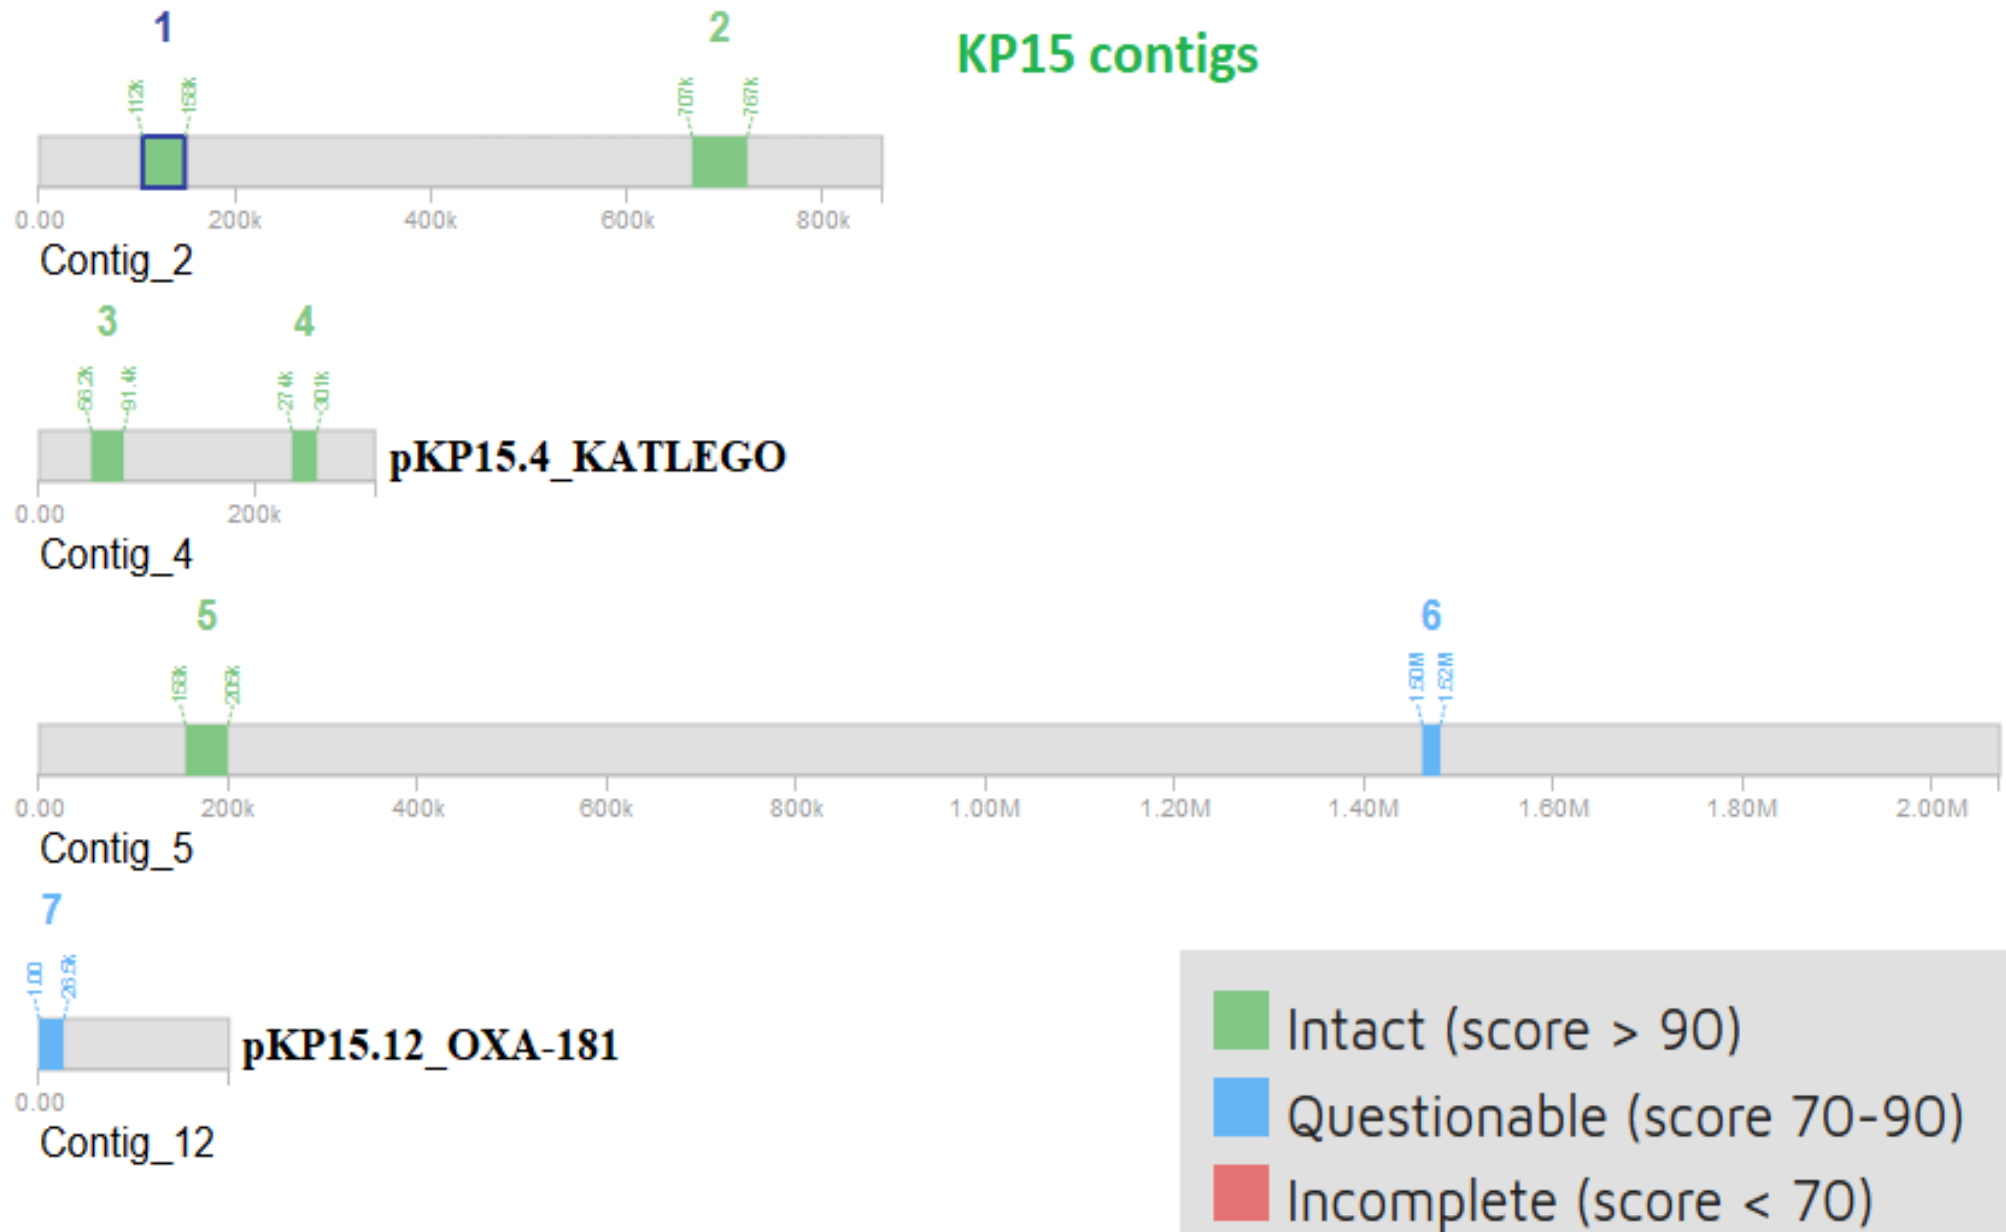

Figure S9.1

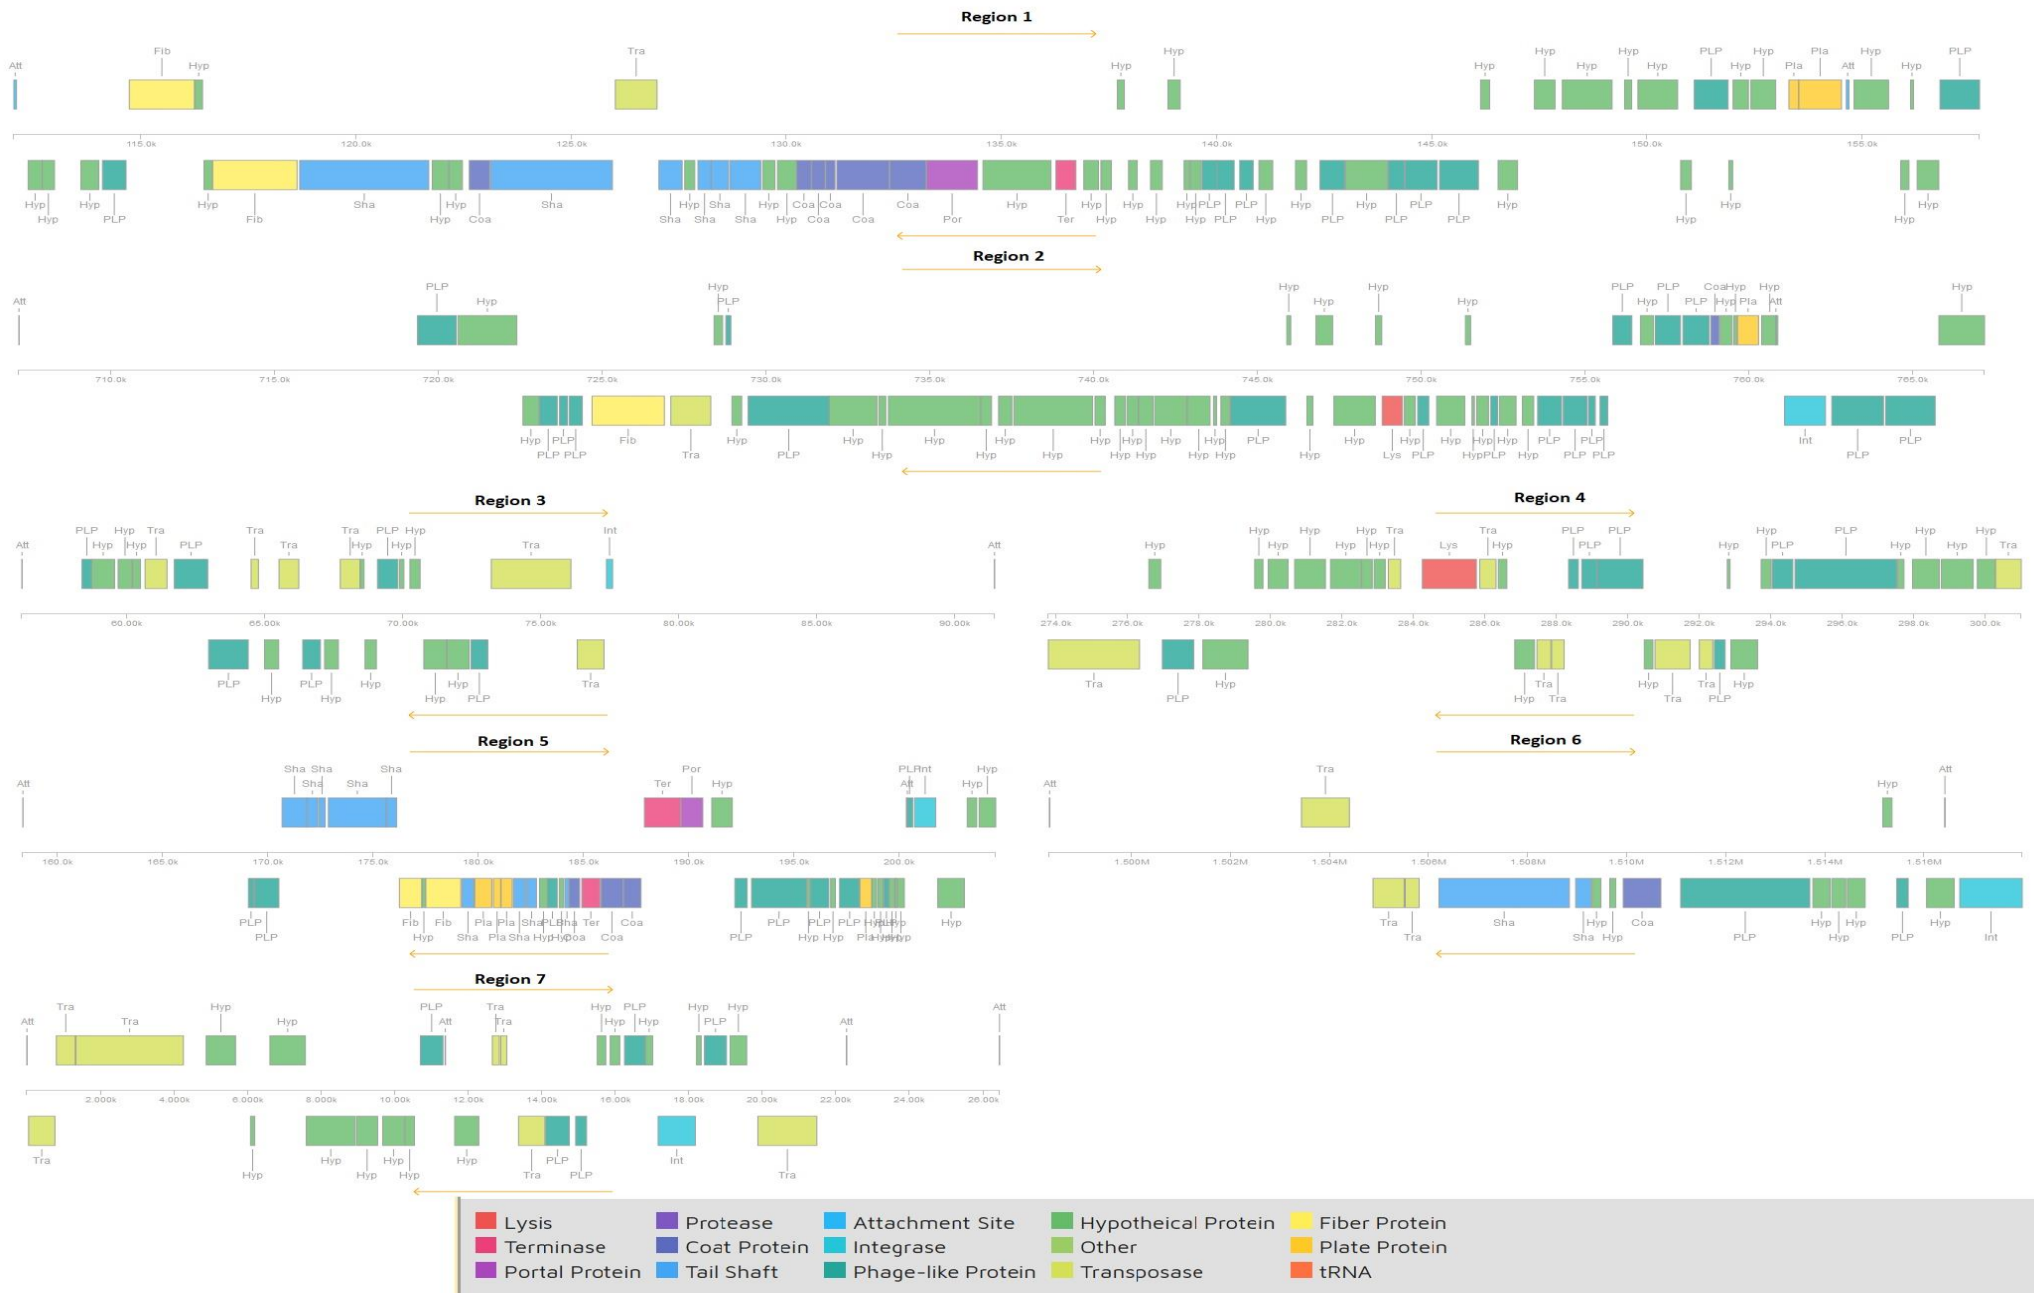

Figure S9.2

## KP29 contigs

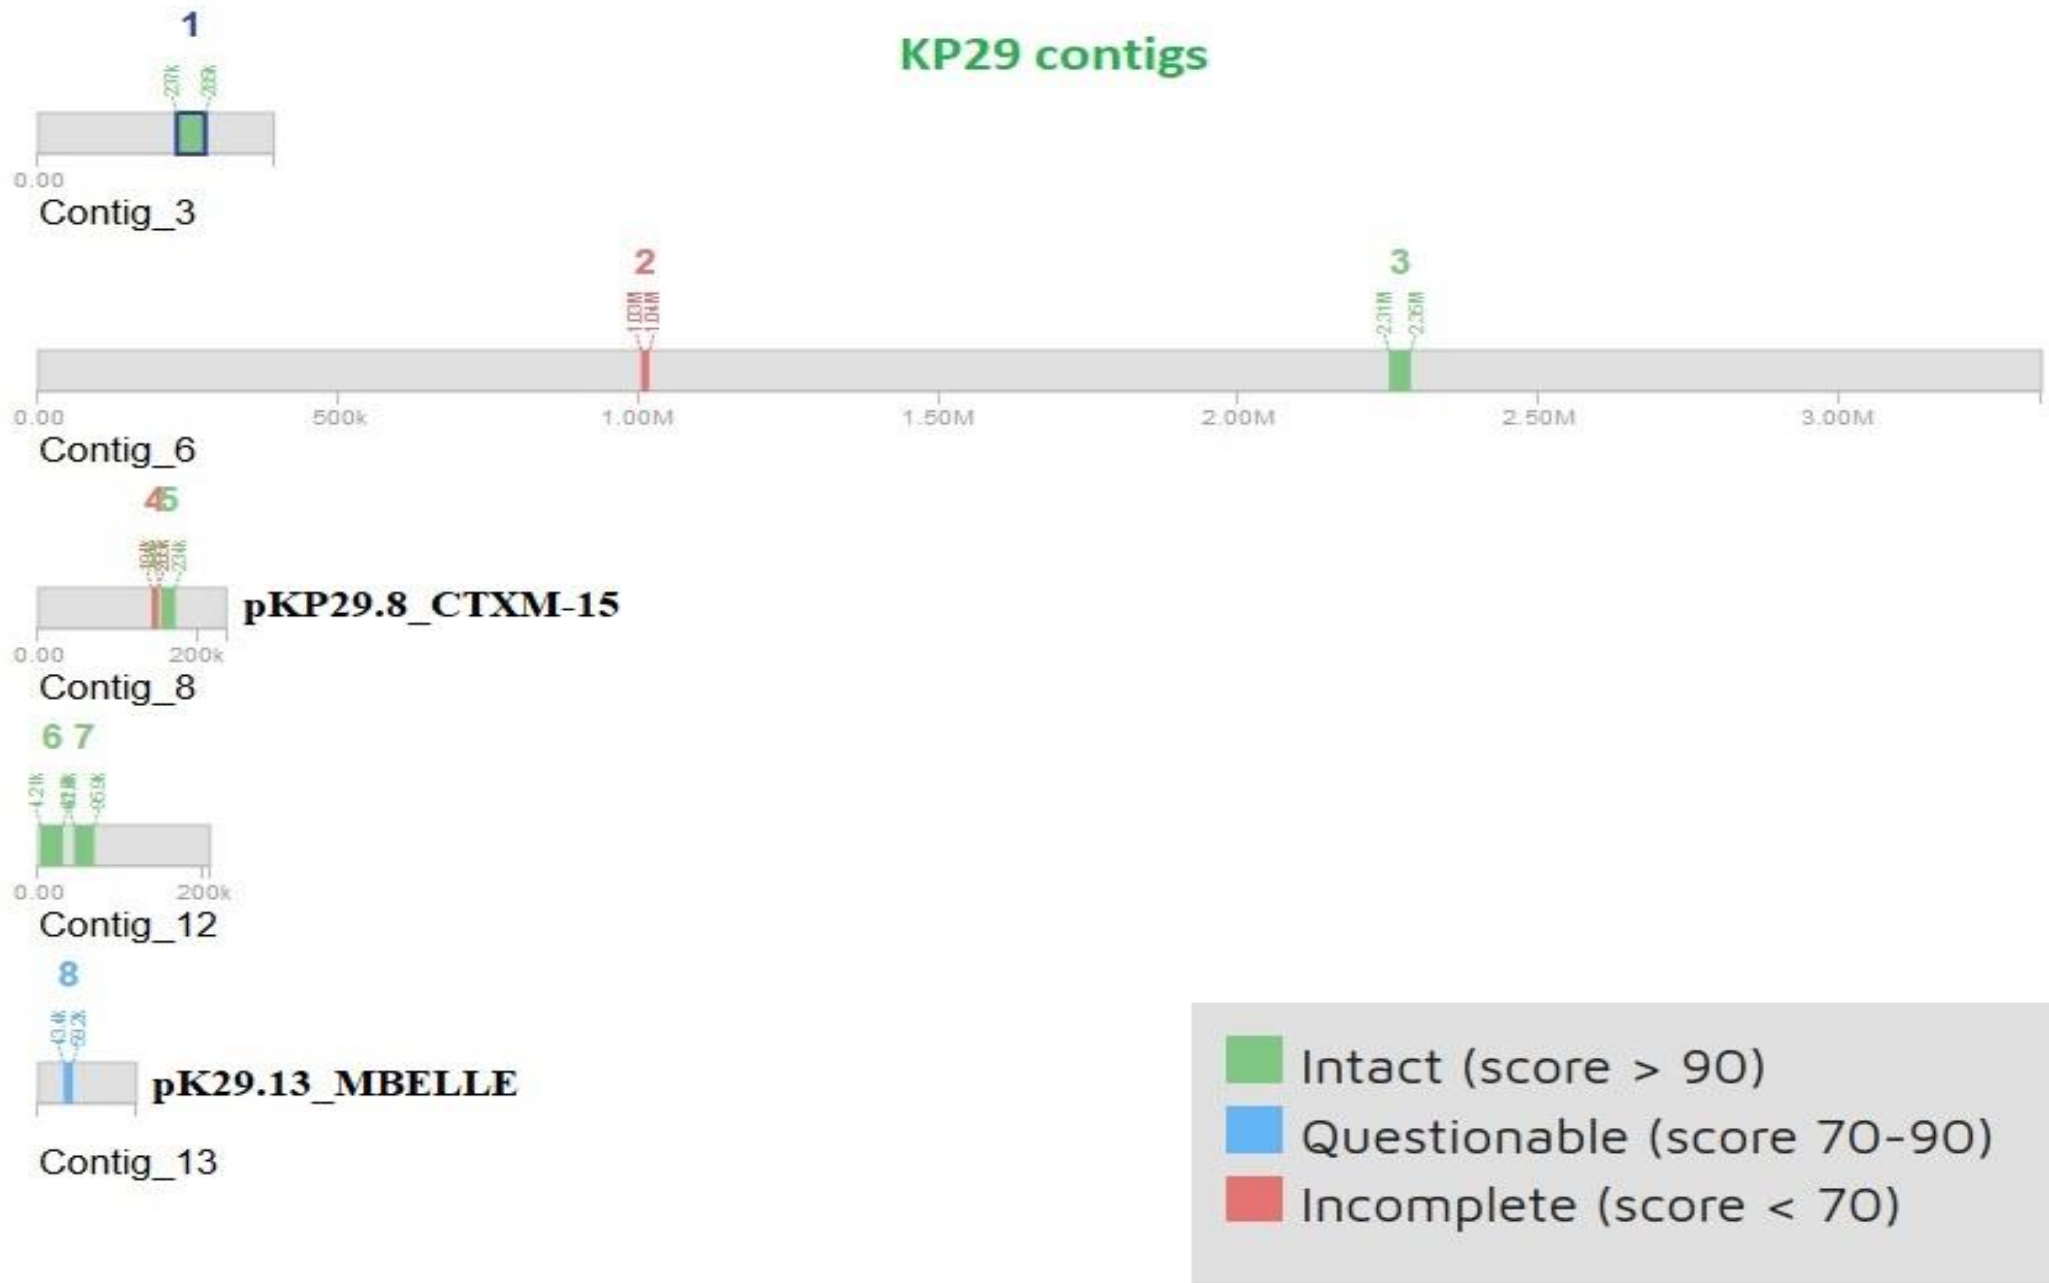

Figure S10.1

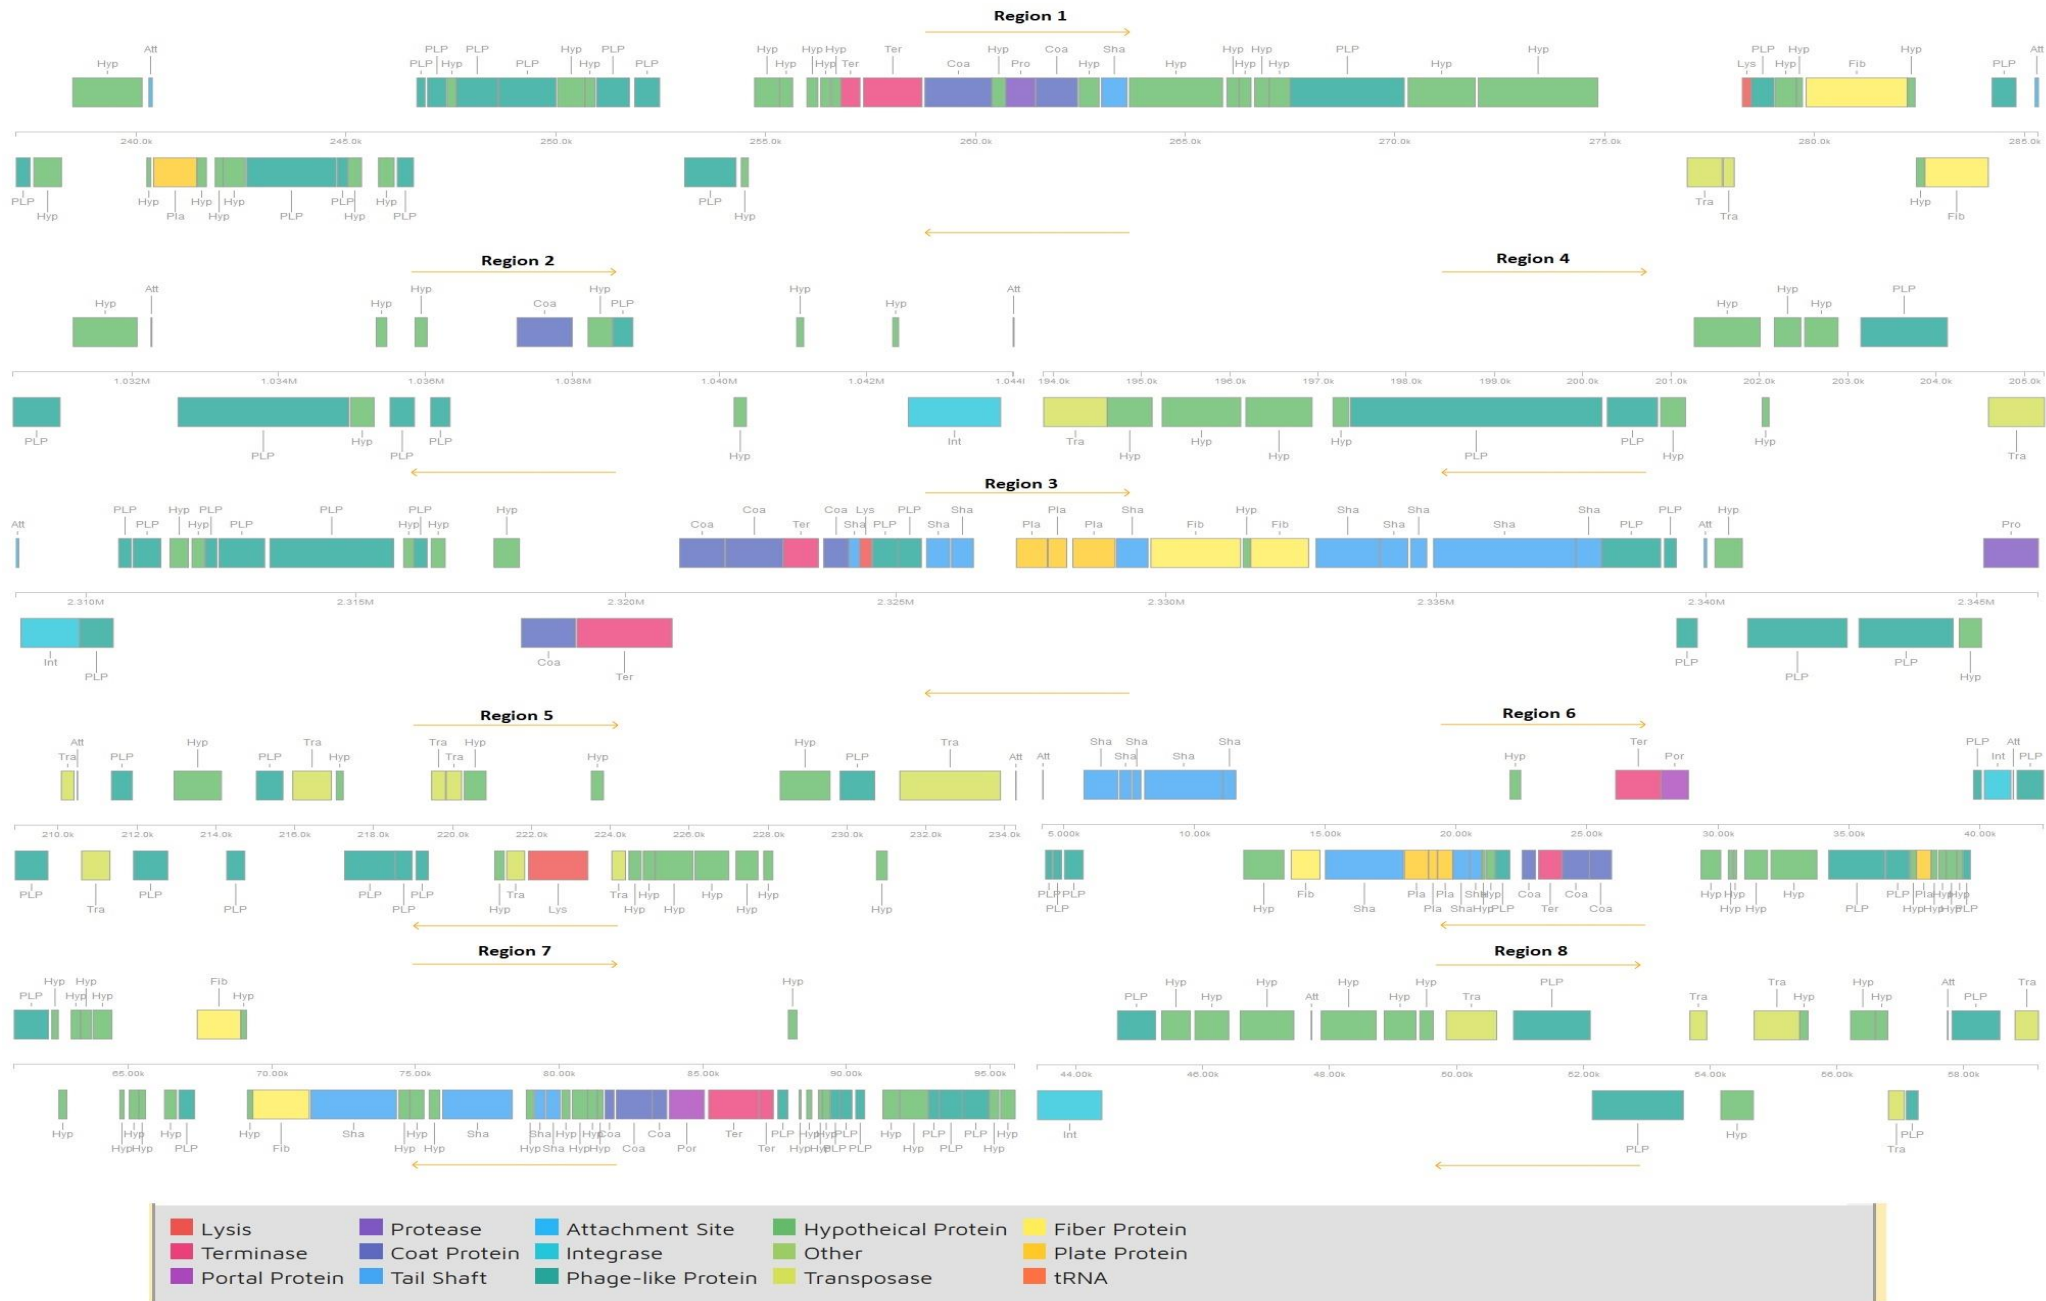

Figure S10.2

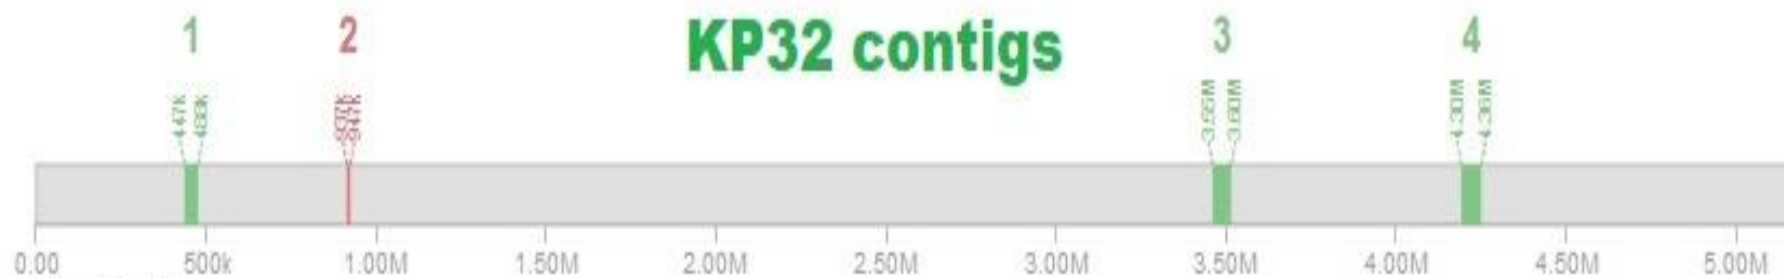

Contig\_1

56 7

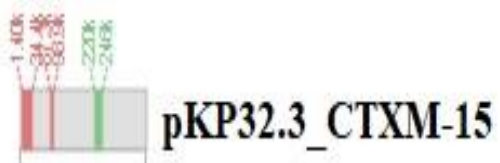

Contig\_3

8

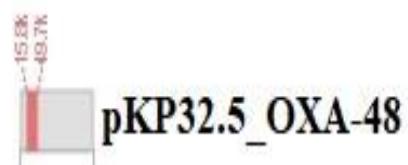

Contig\_5

- Intact (score > 90)
- Questionable (score 70-90)
- Incomplete (score < 70)

**Figure S11.1**

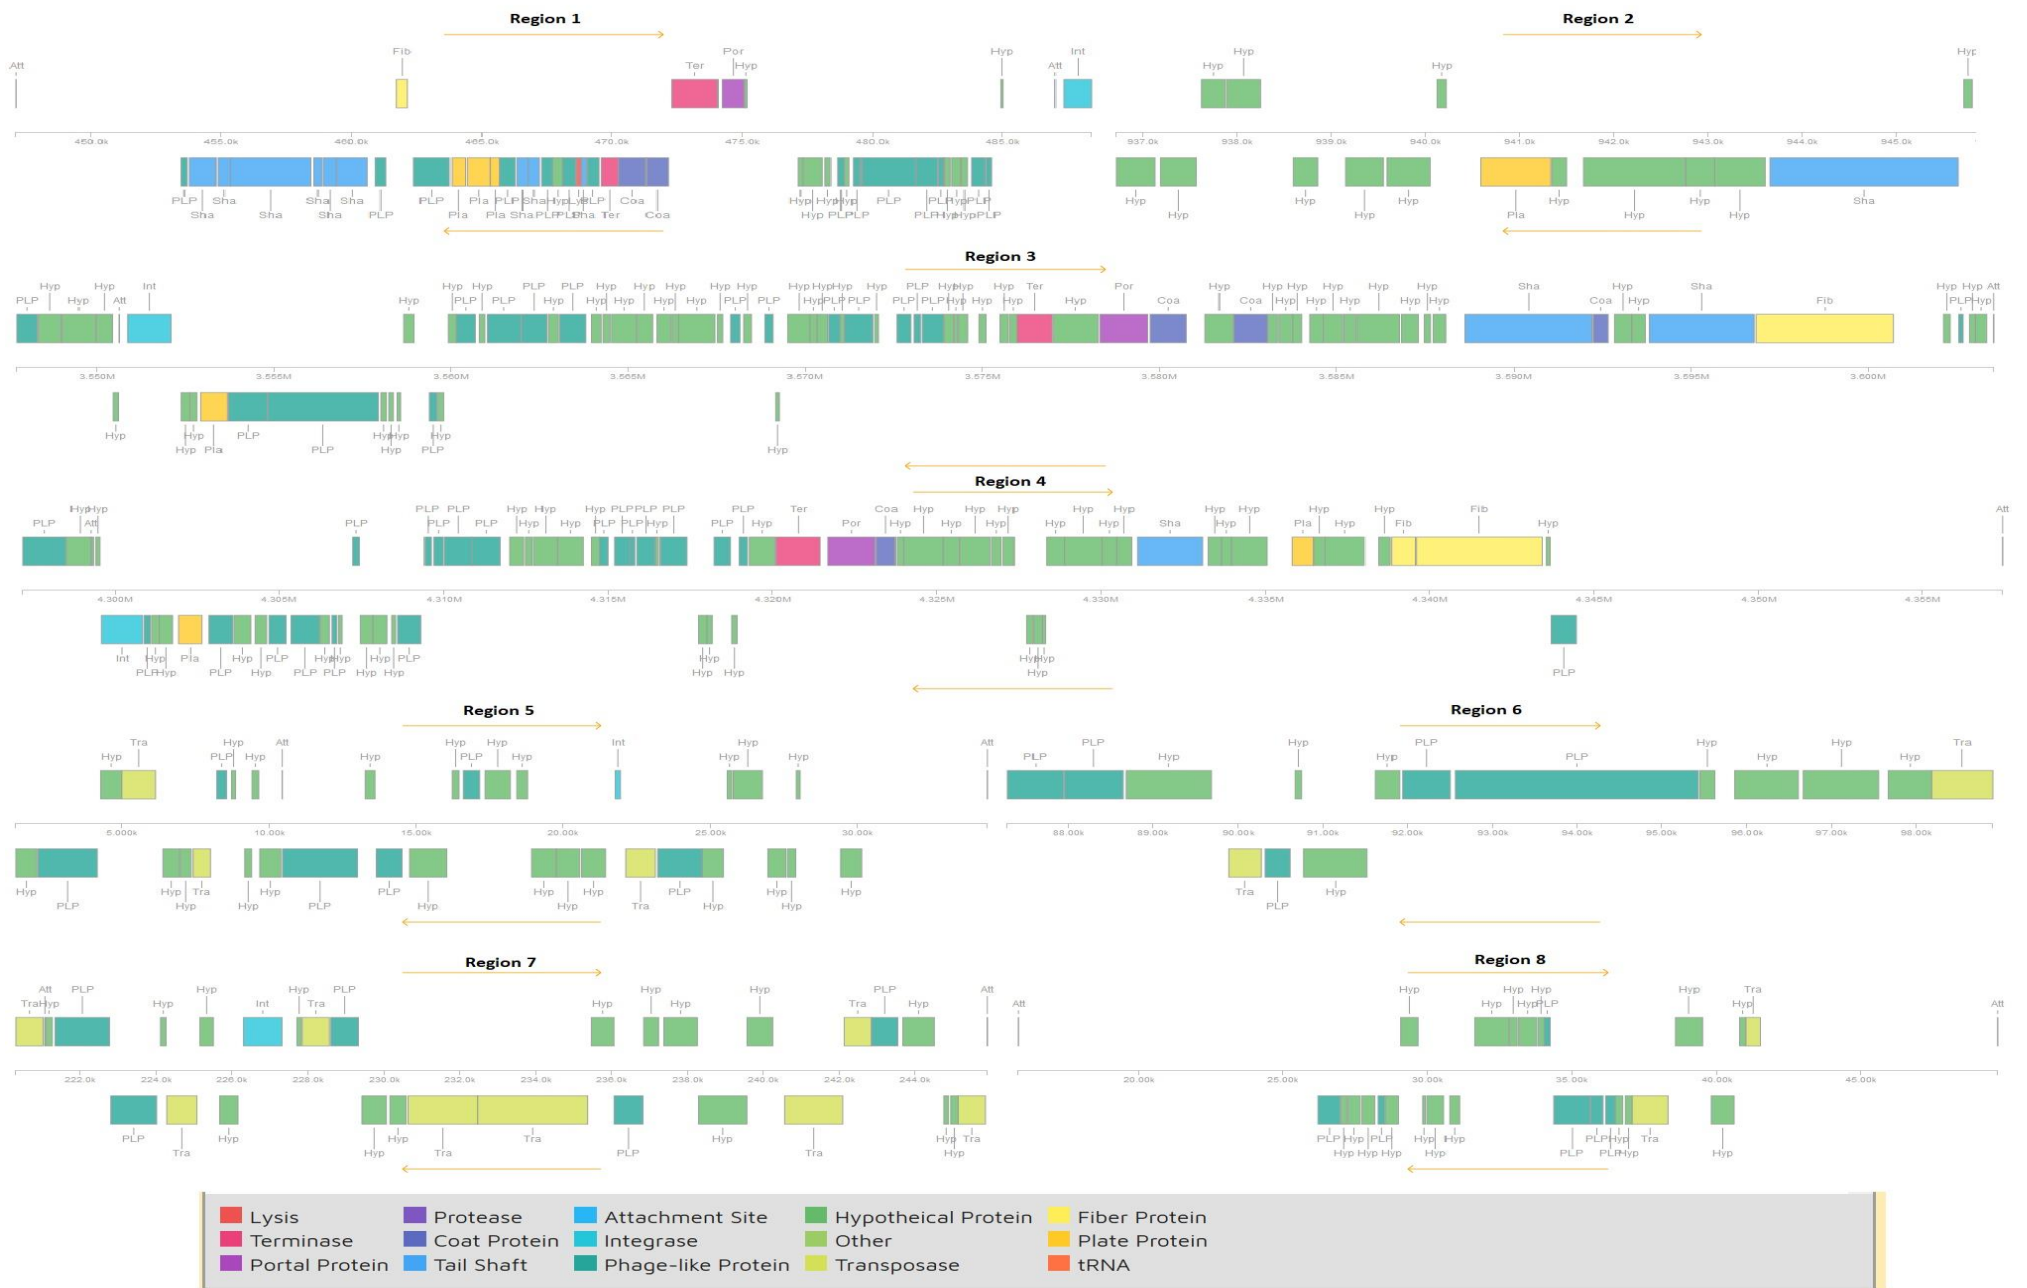

**Figure S11.2**

# KP33 contigs

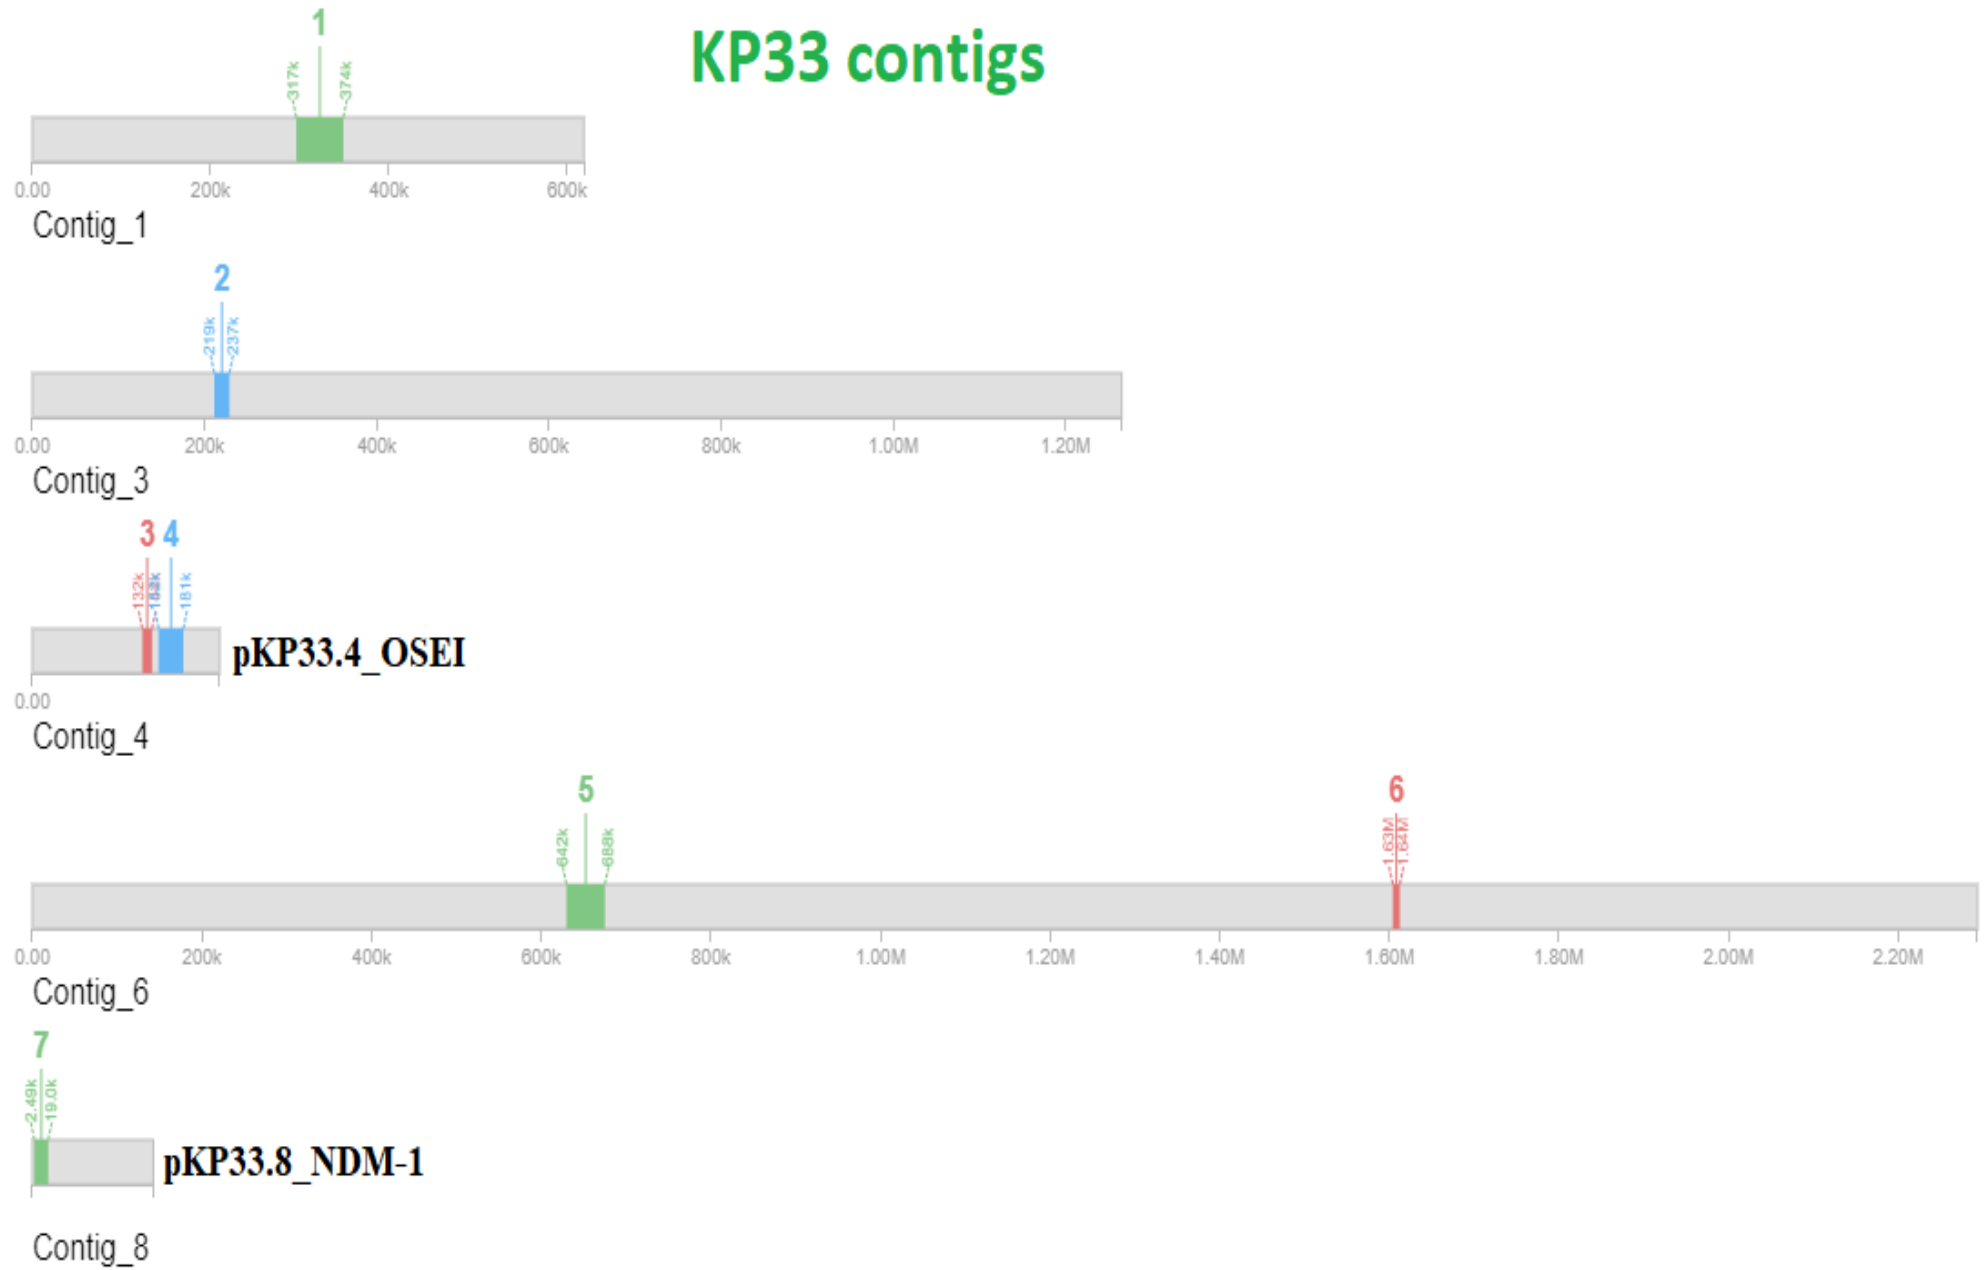

Figure S12.1



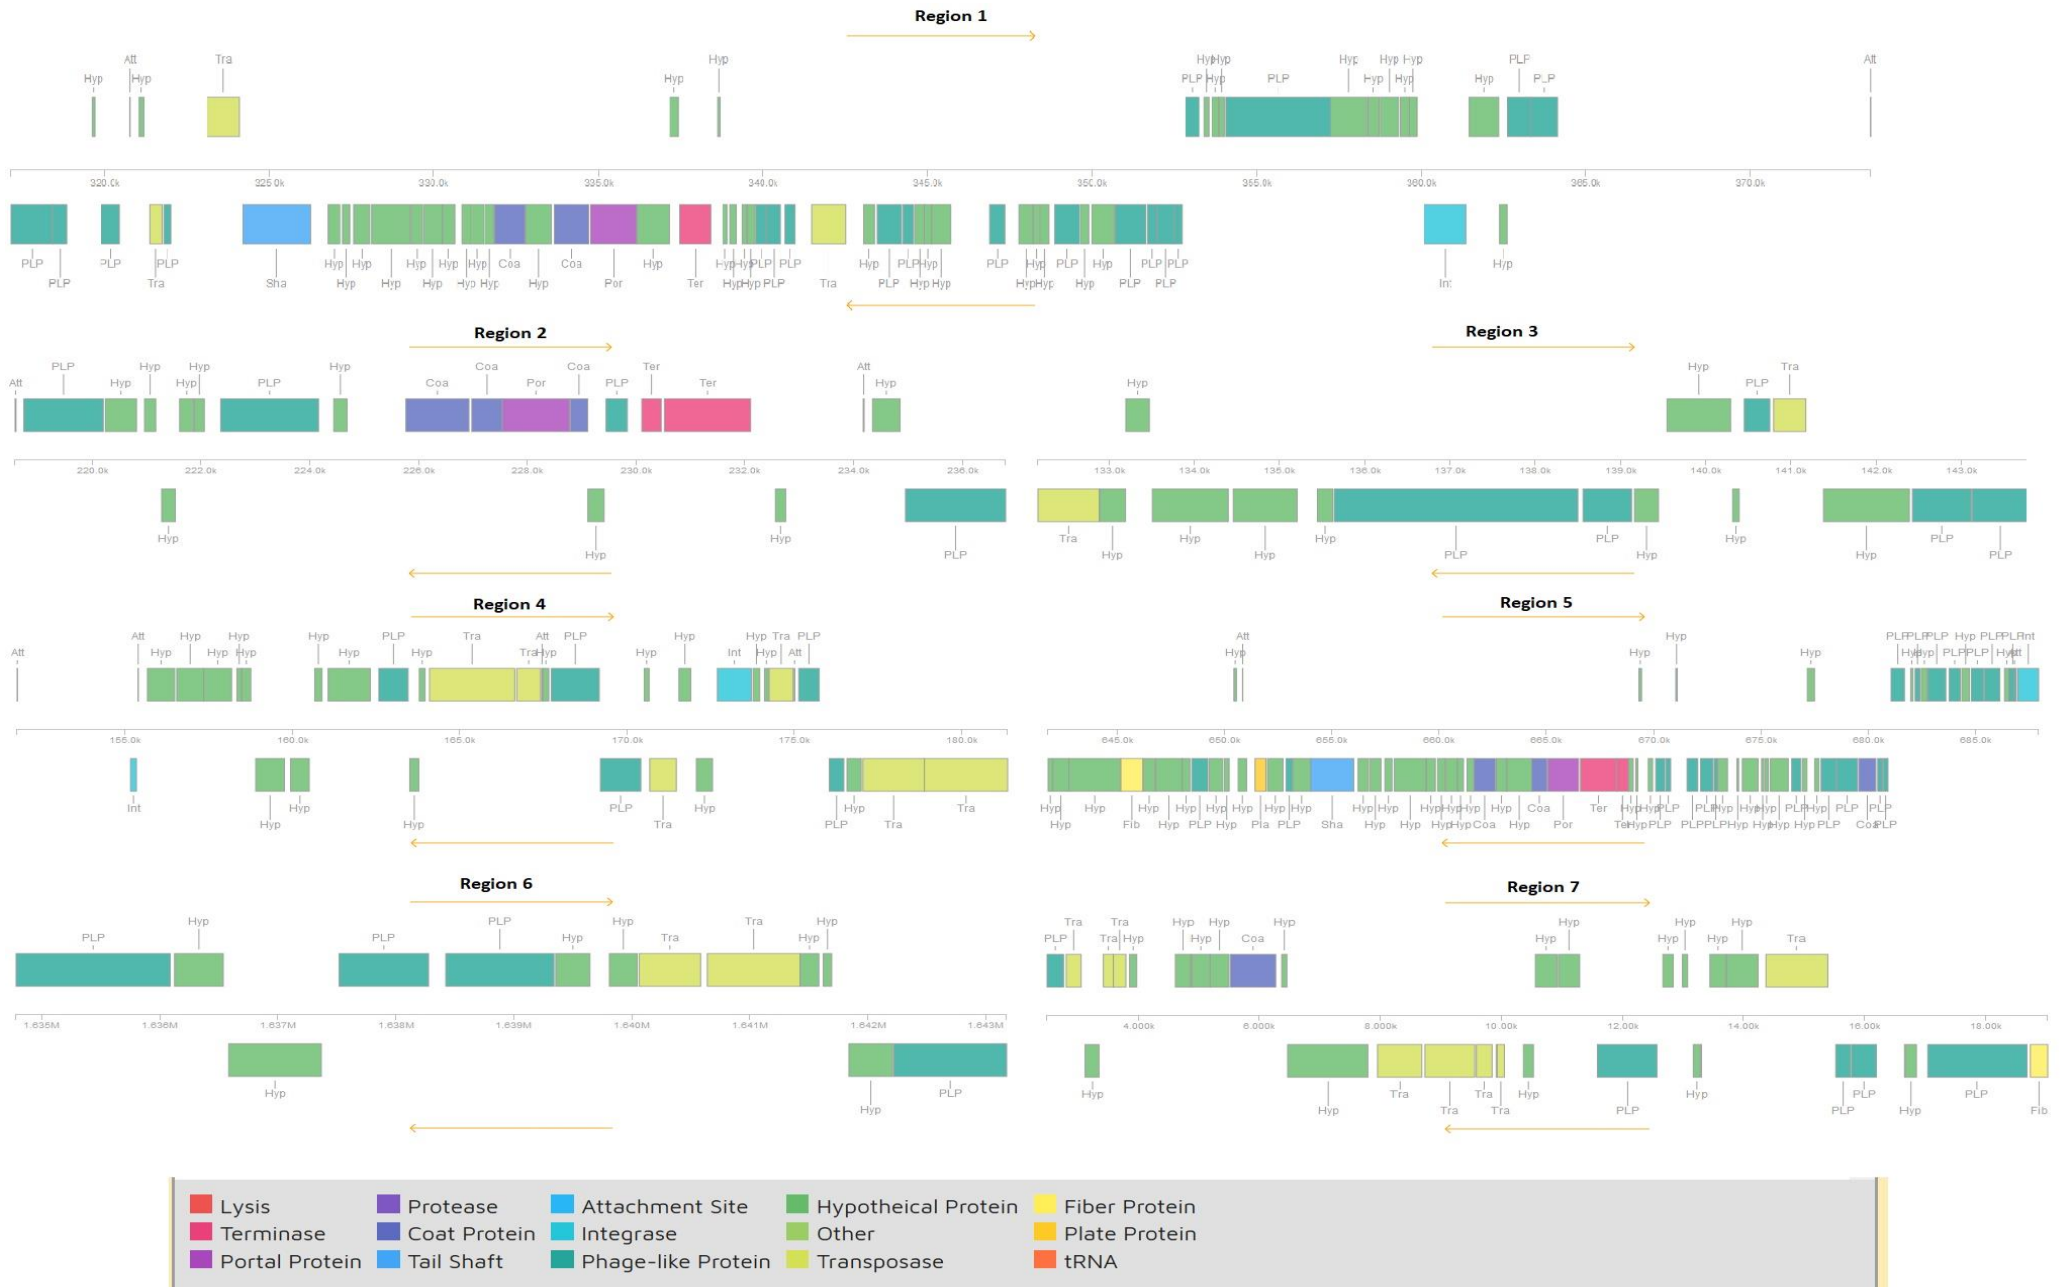

Figure S12.2

13.1

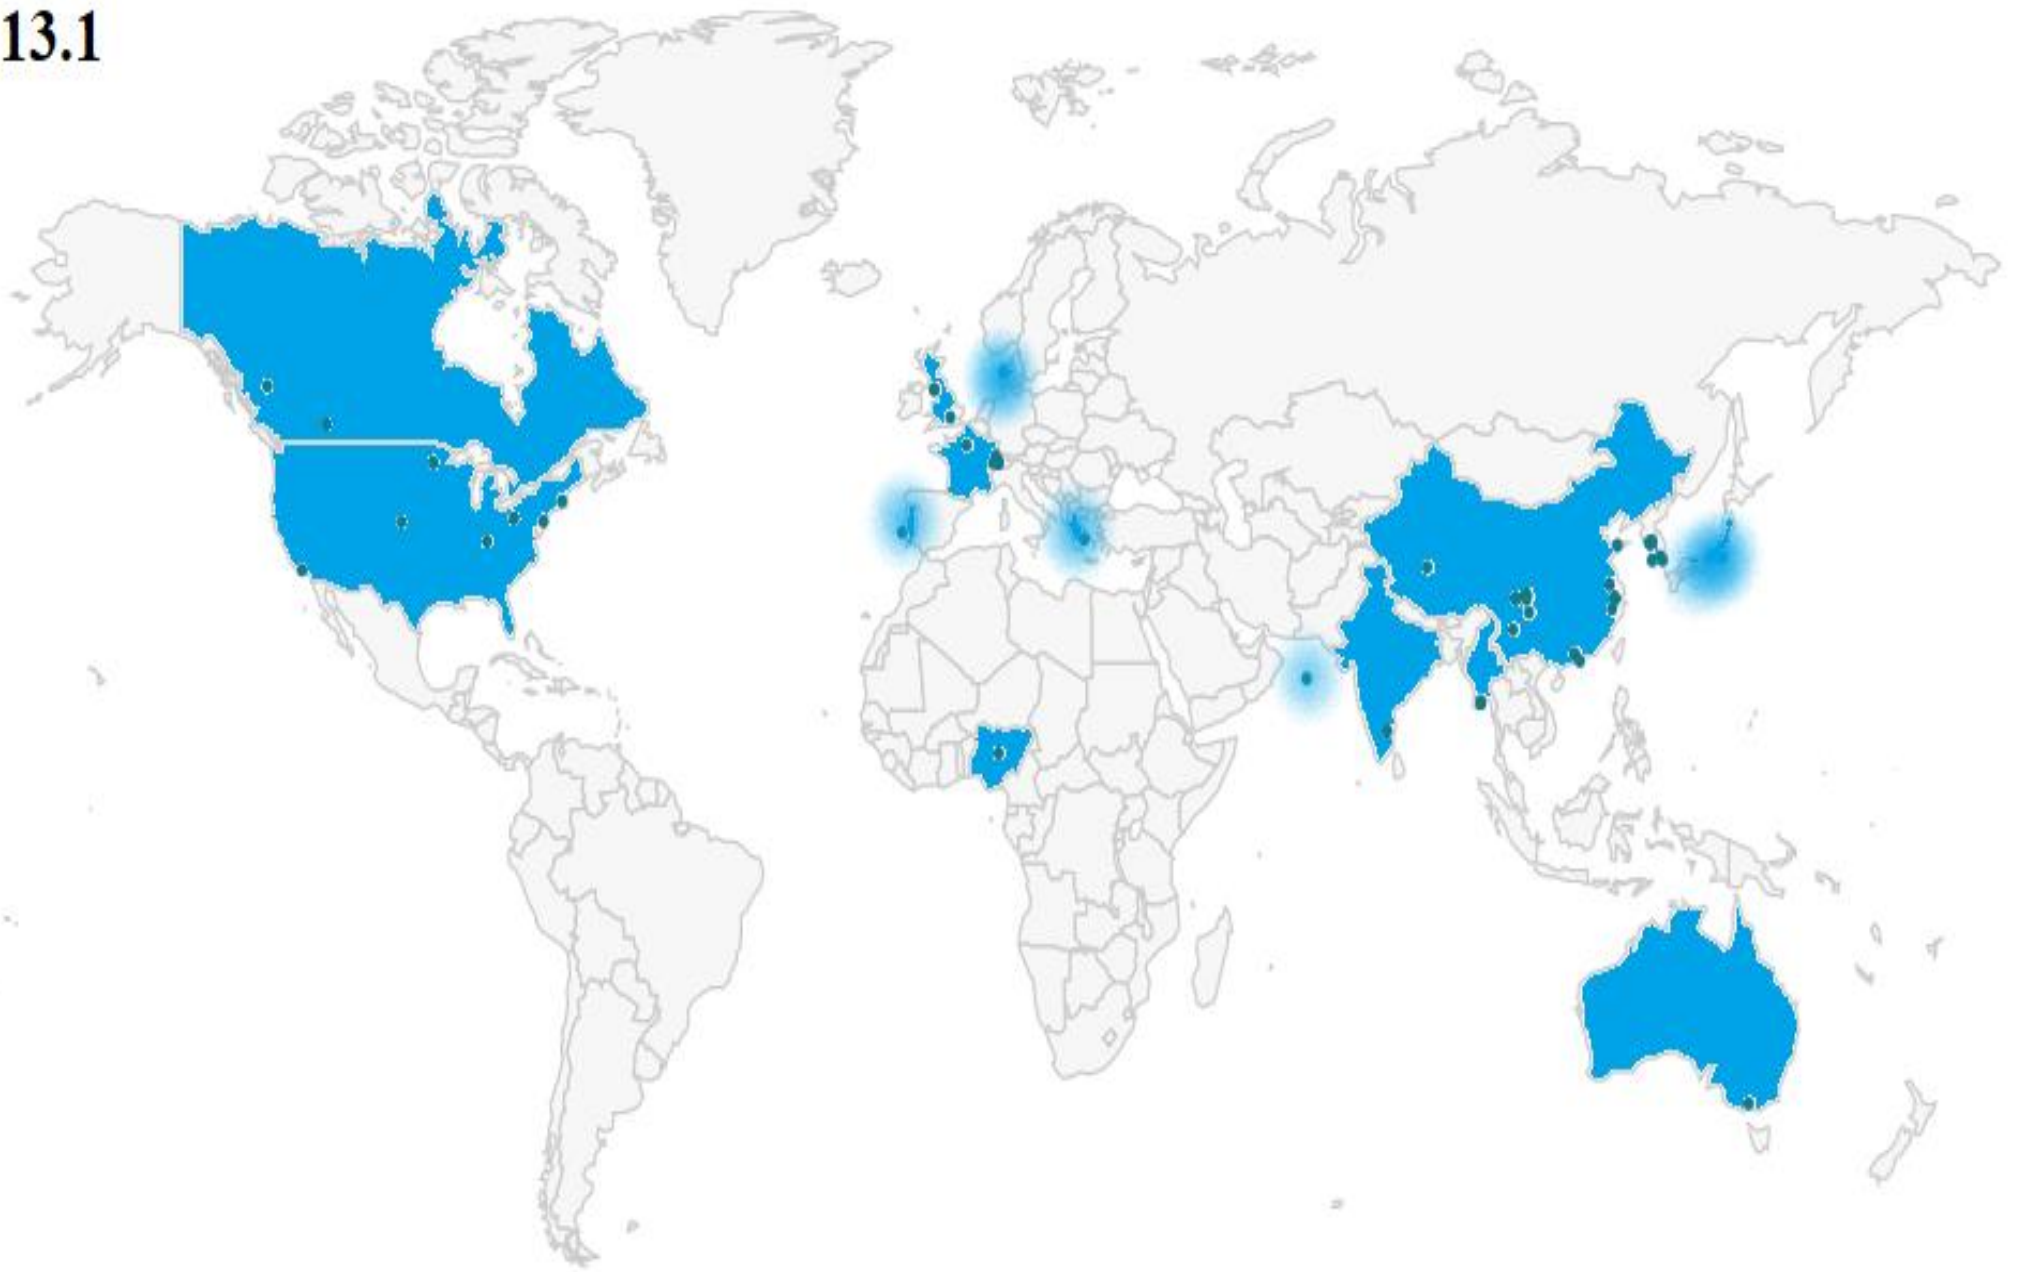

Figure S13.1

13.2

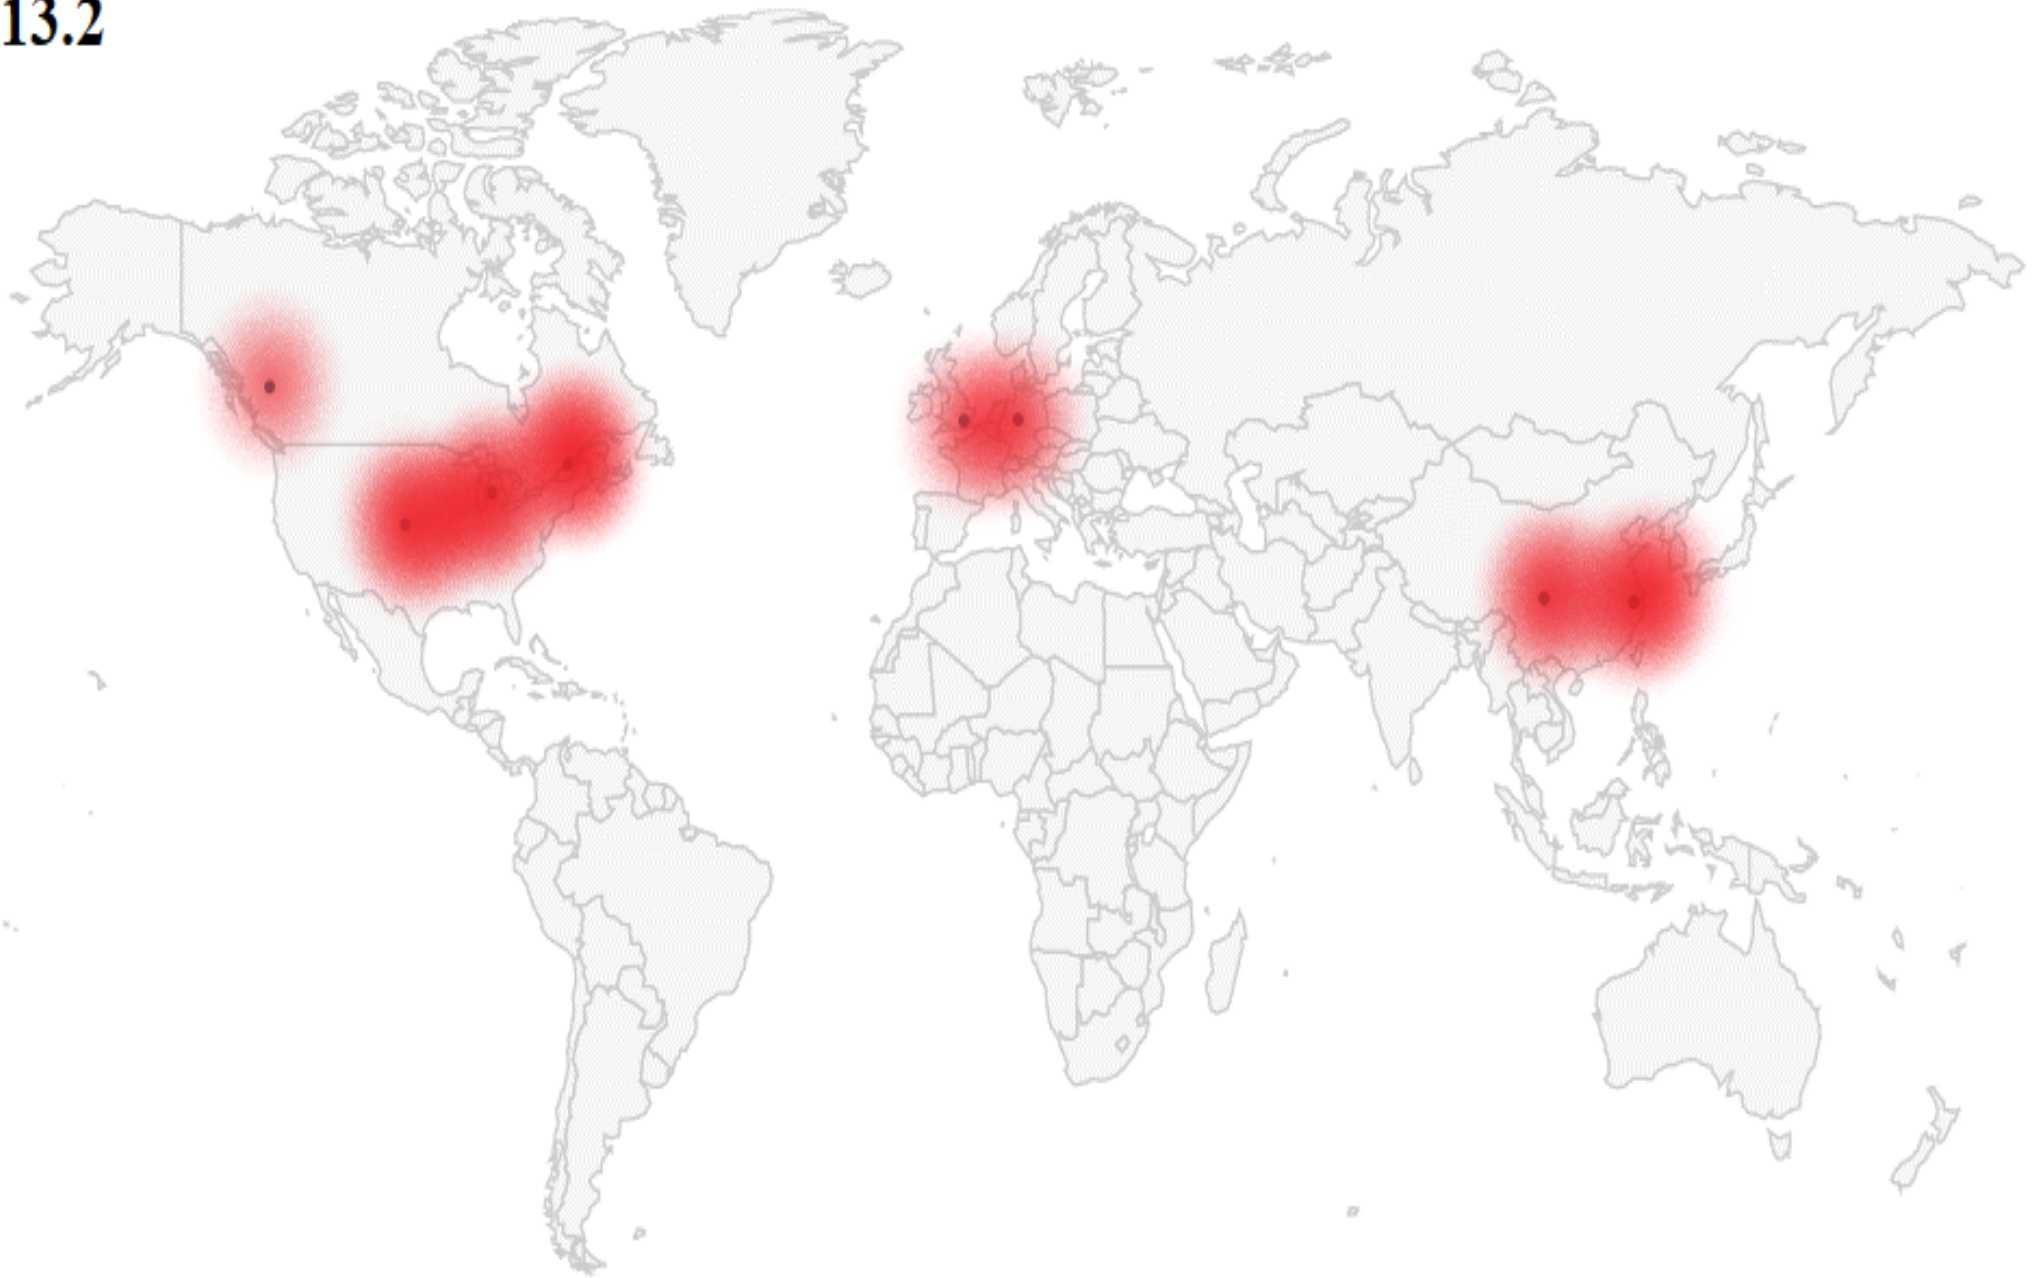

Figure S13.2

13.3

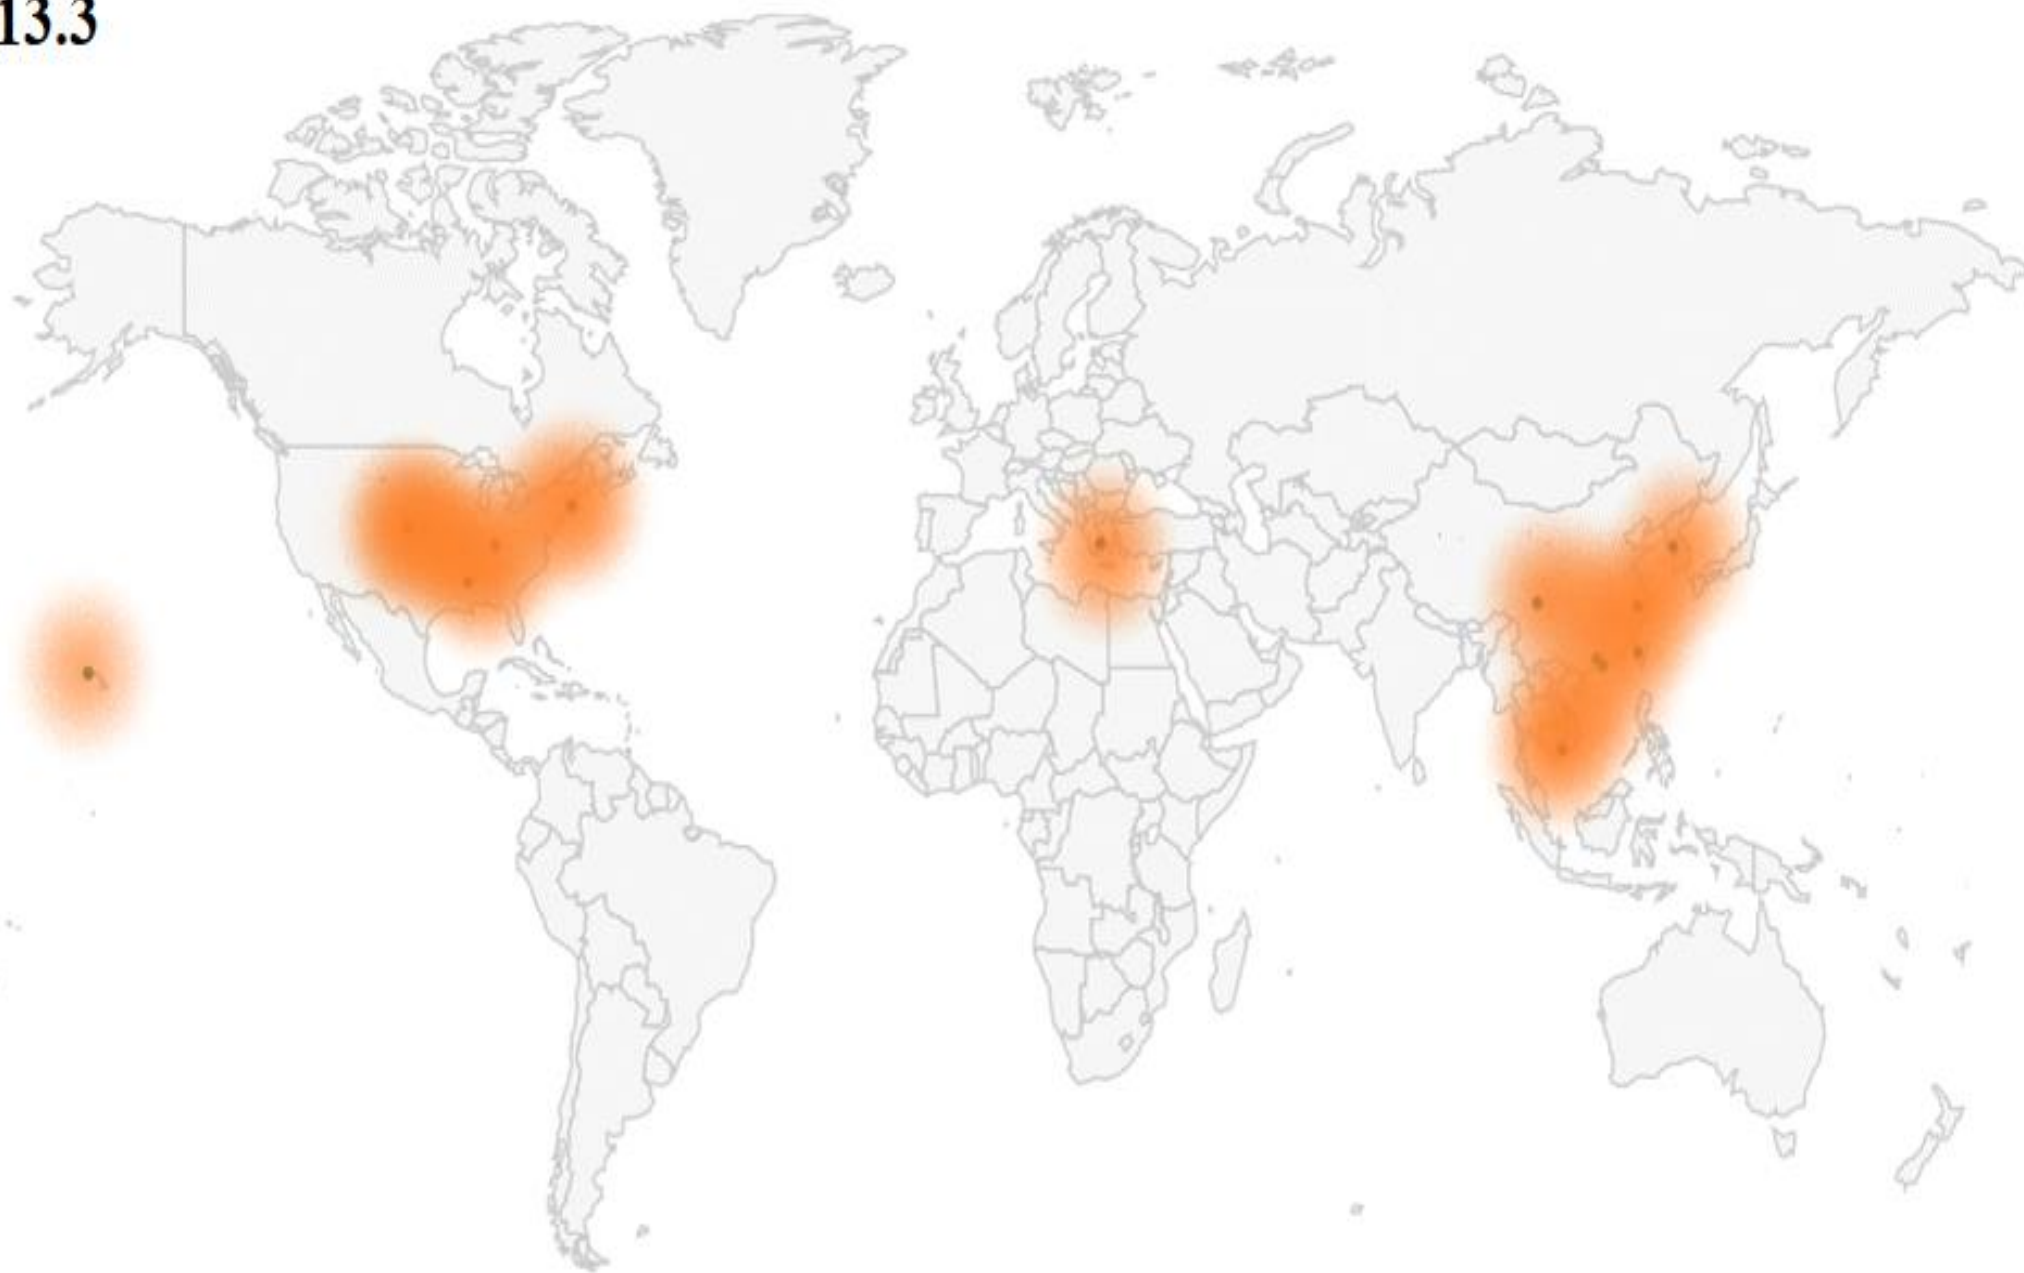

Figure S13.3

13.4

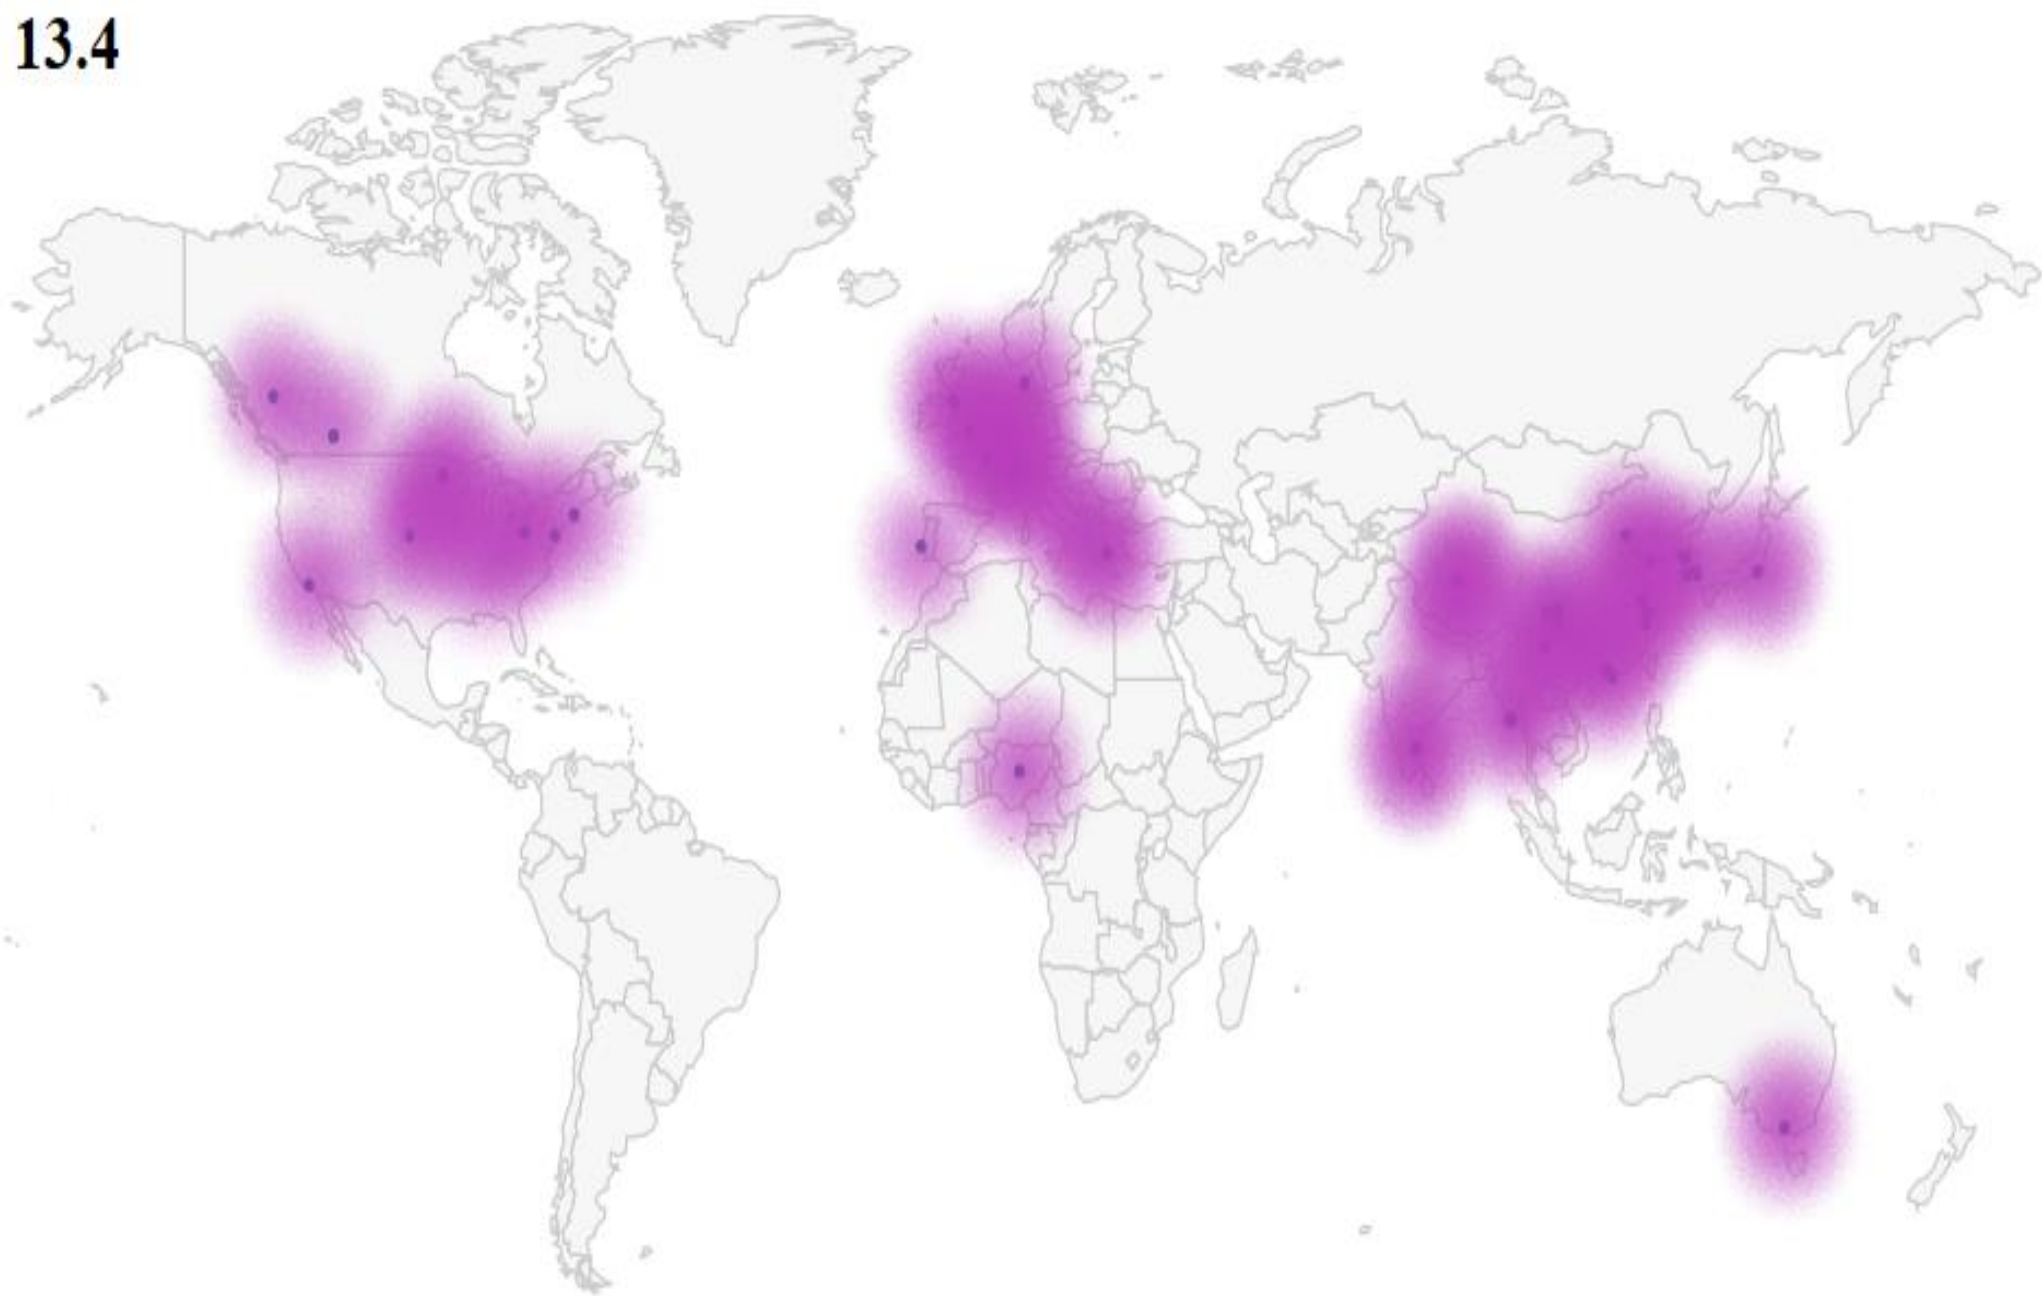

Figure S13.4



13.5

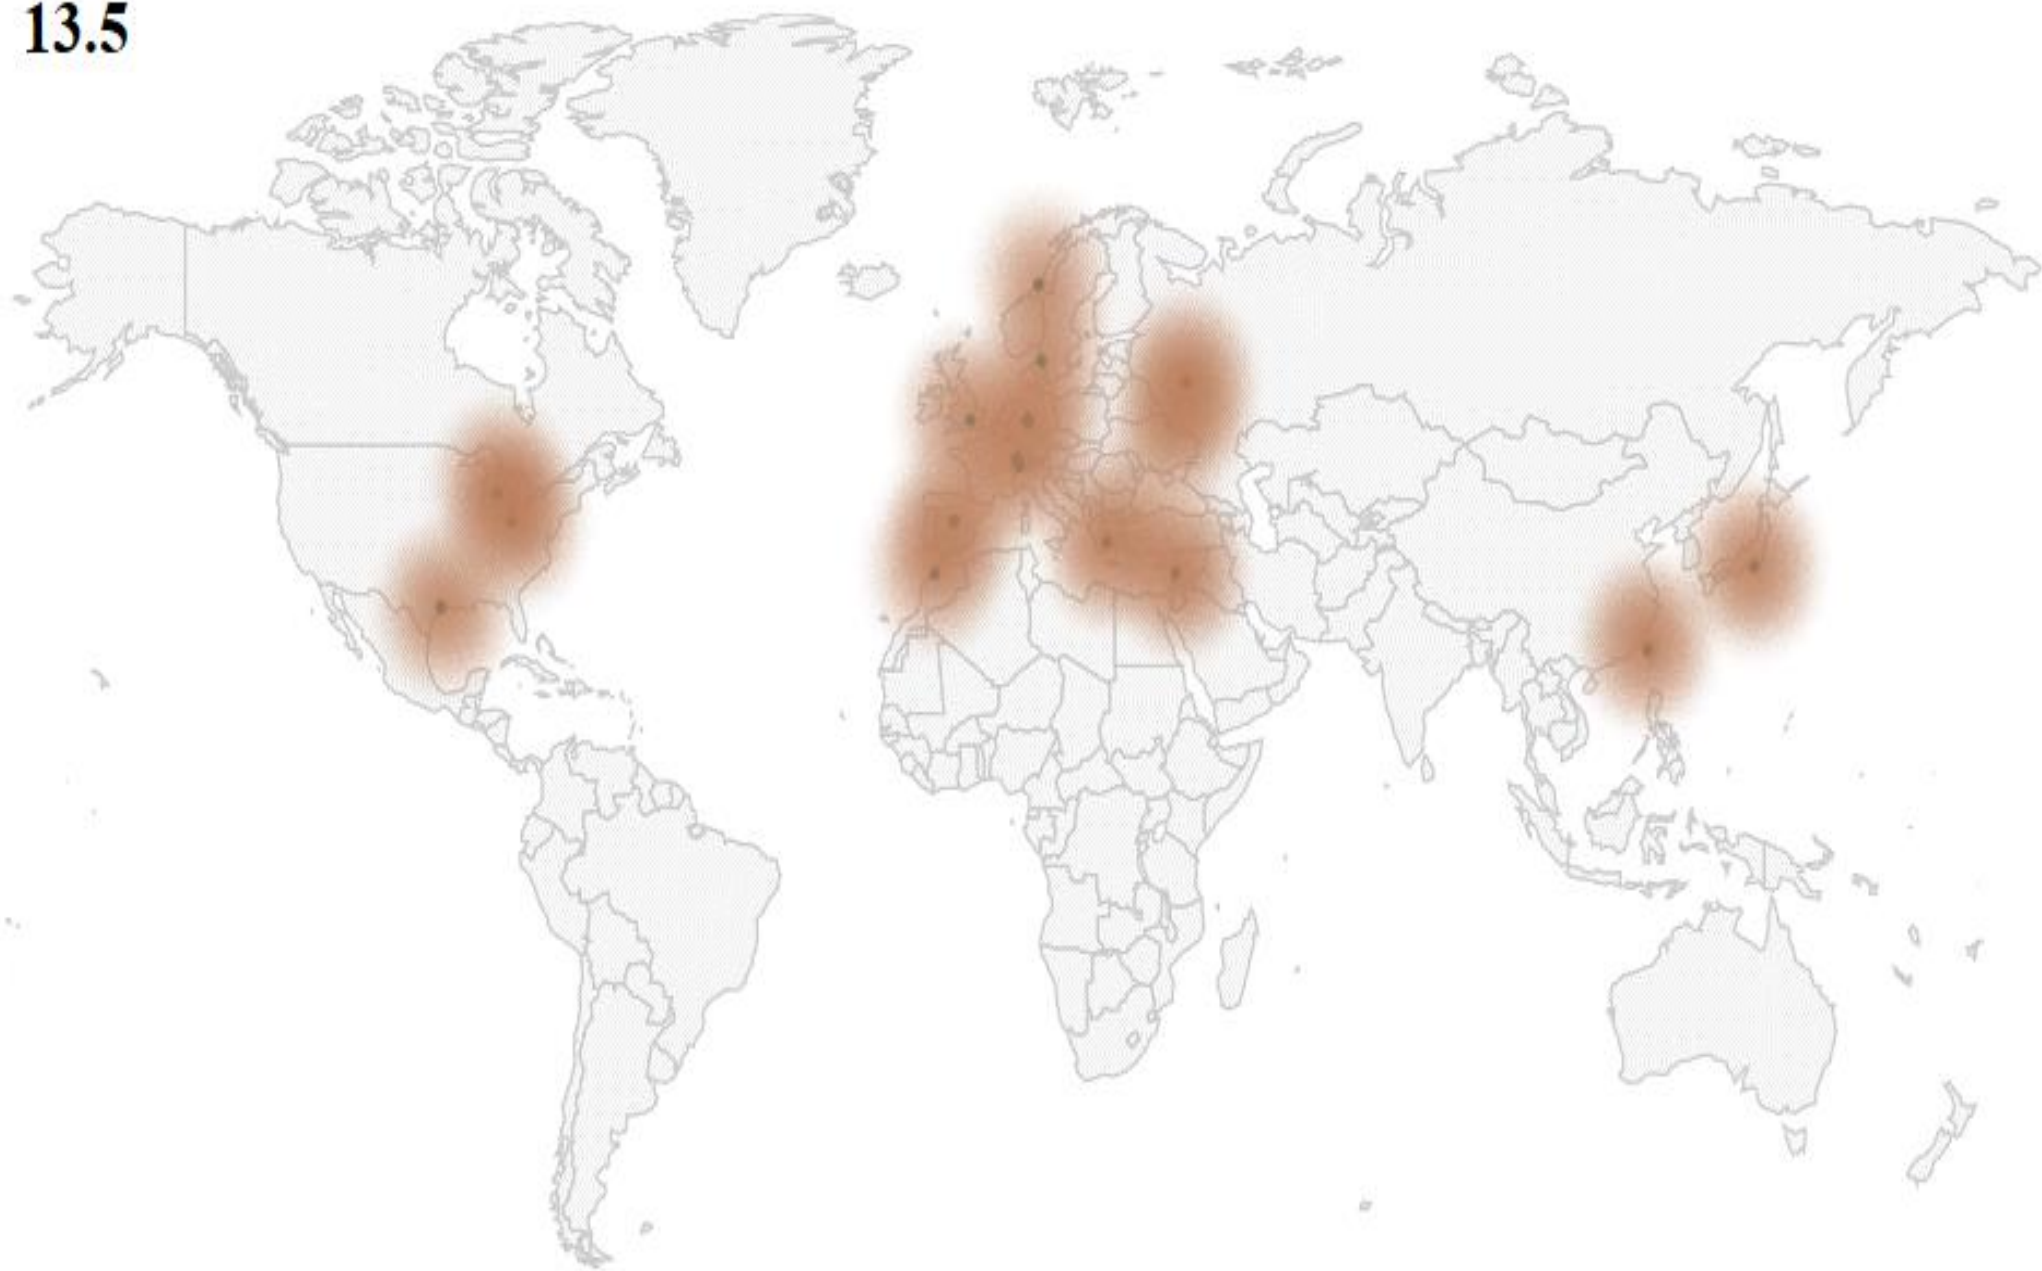

Figure S13.5

13.6

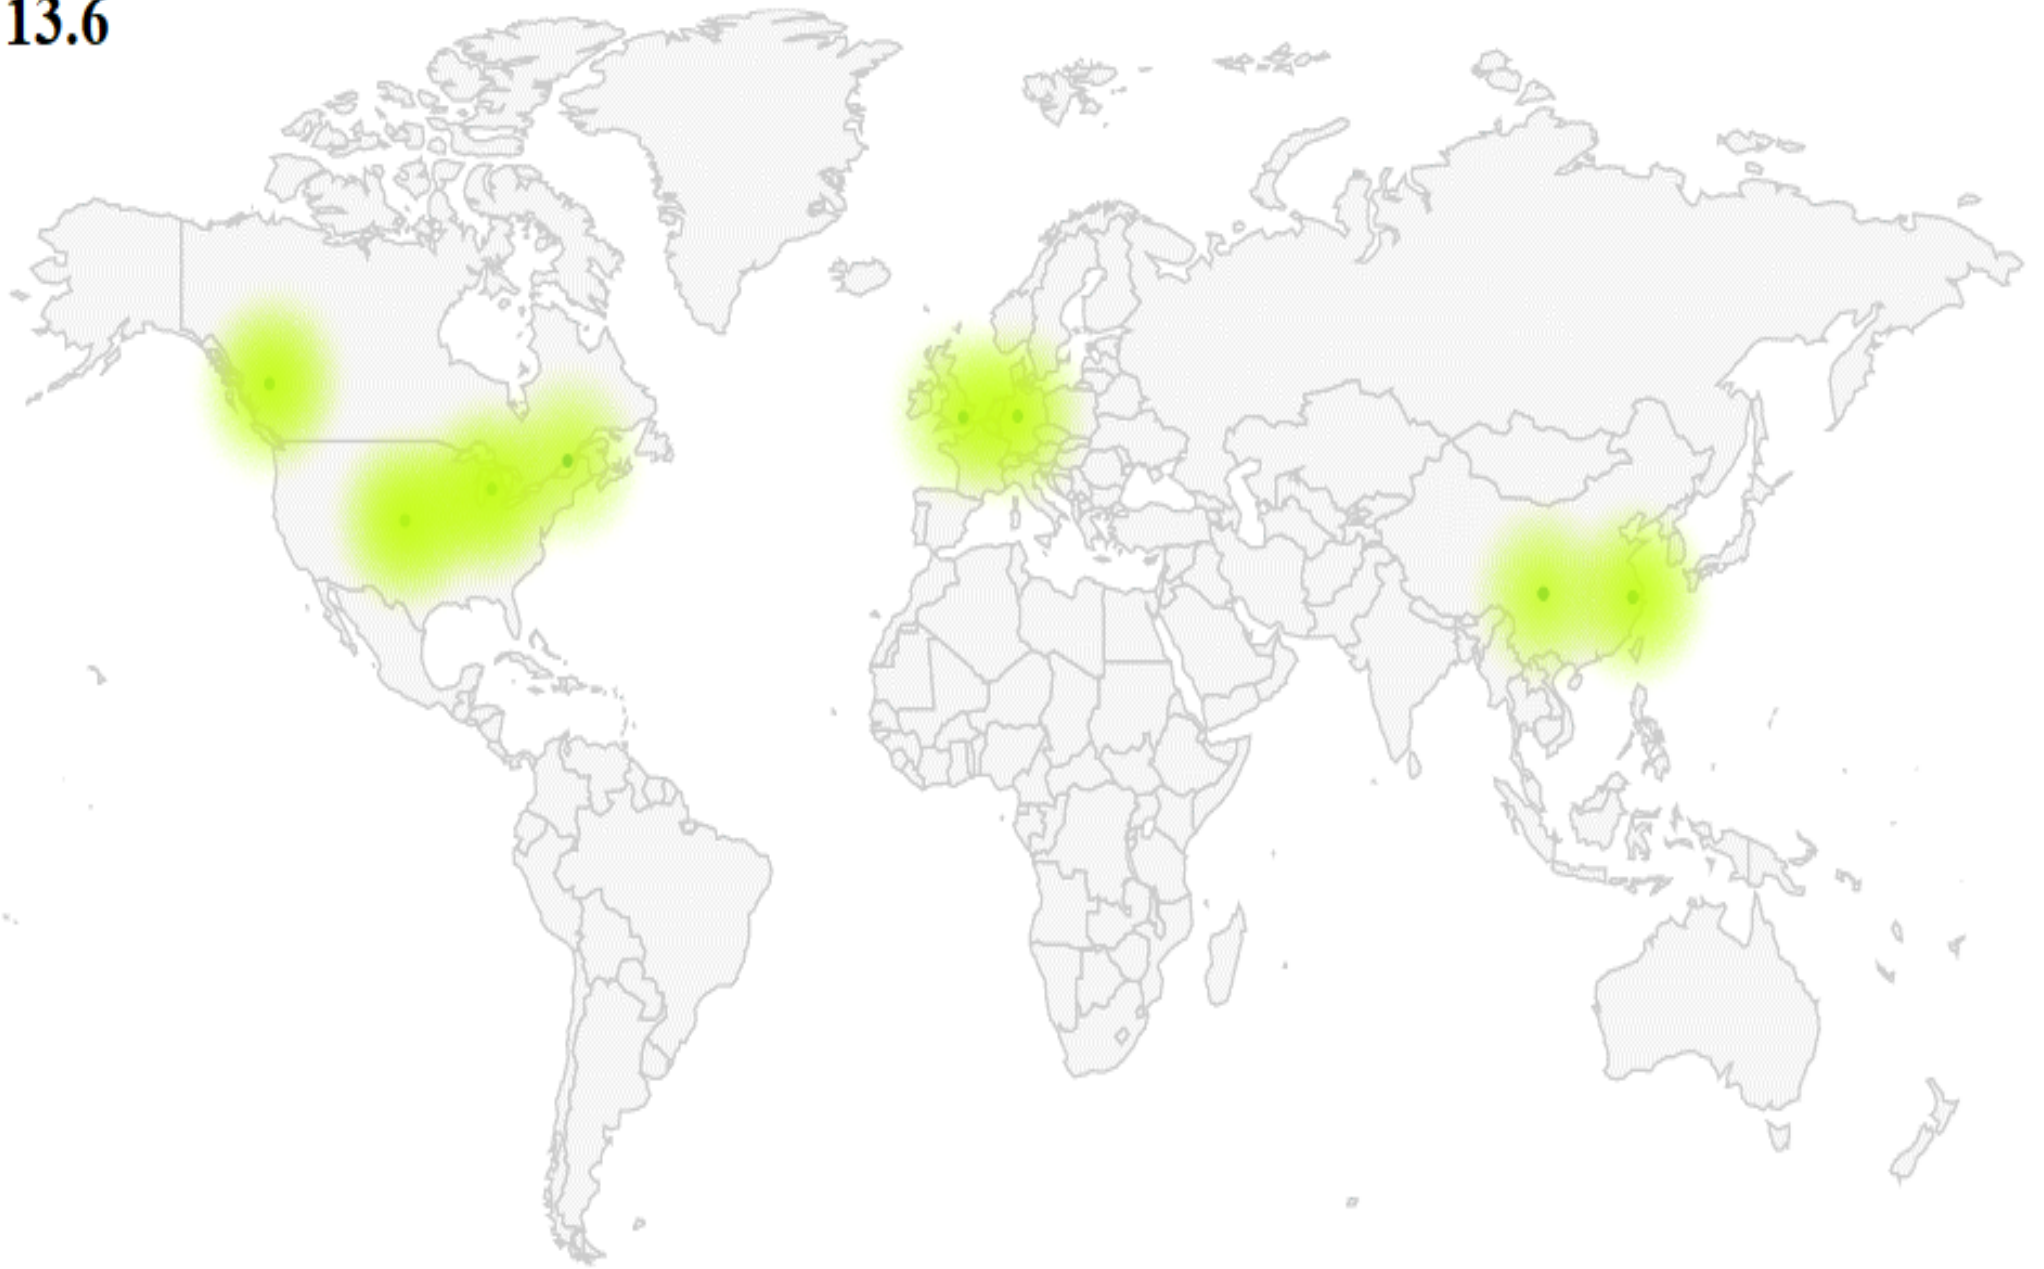

Figure S13.6



### K. pneumoniae virulence factor frequency

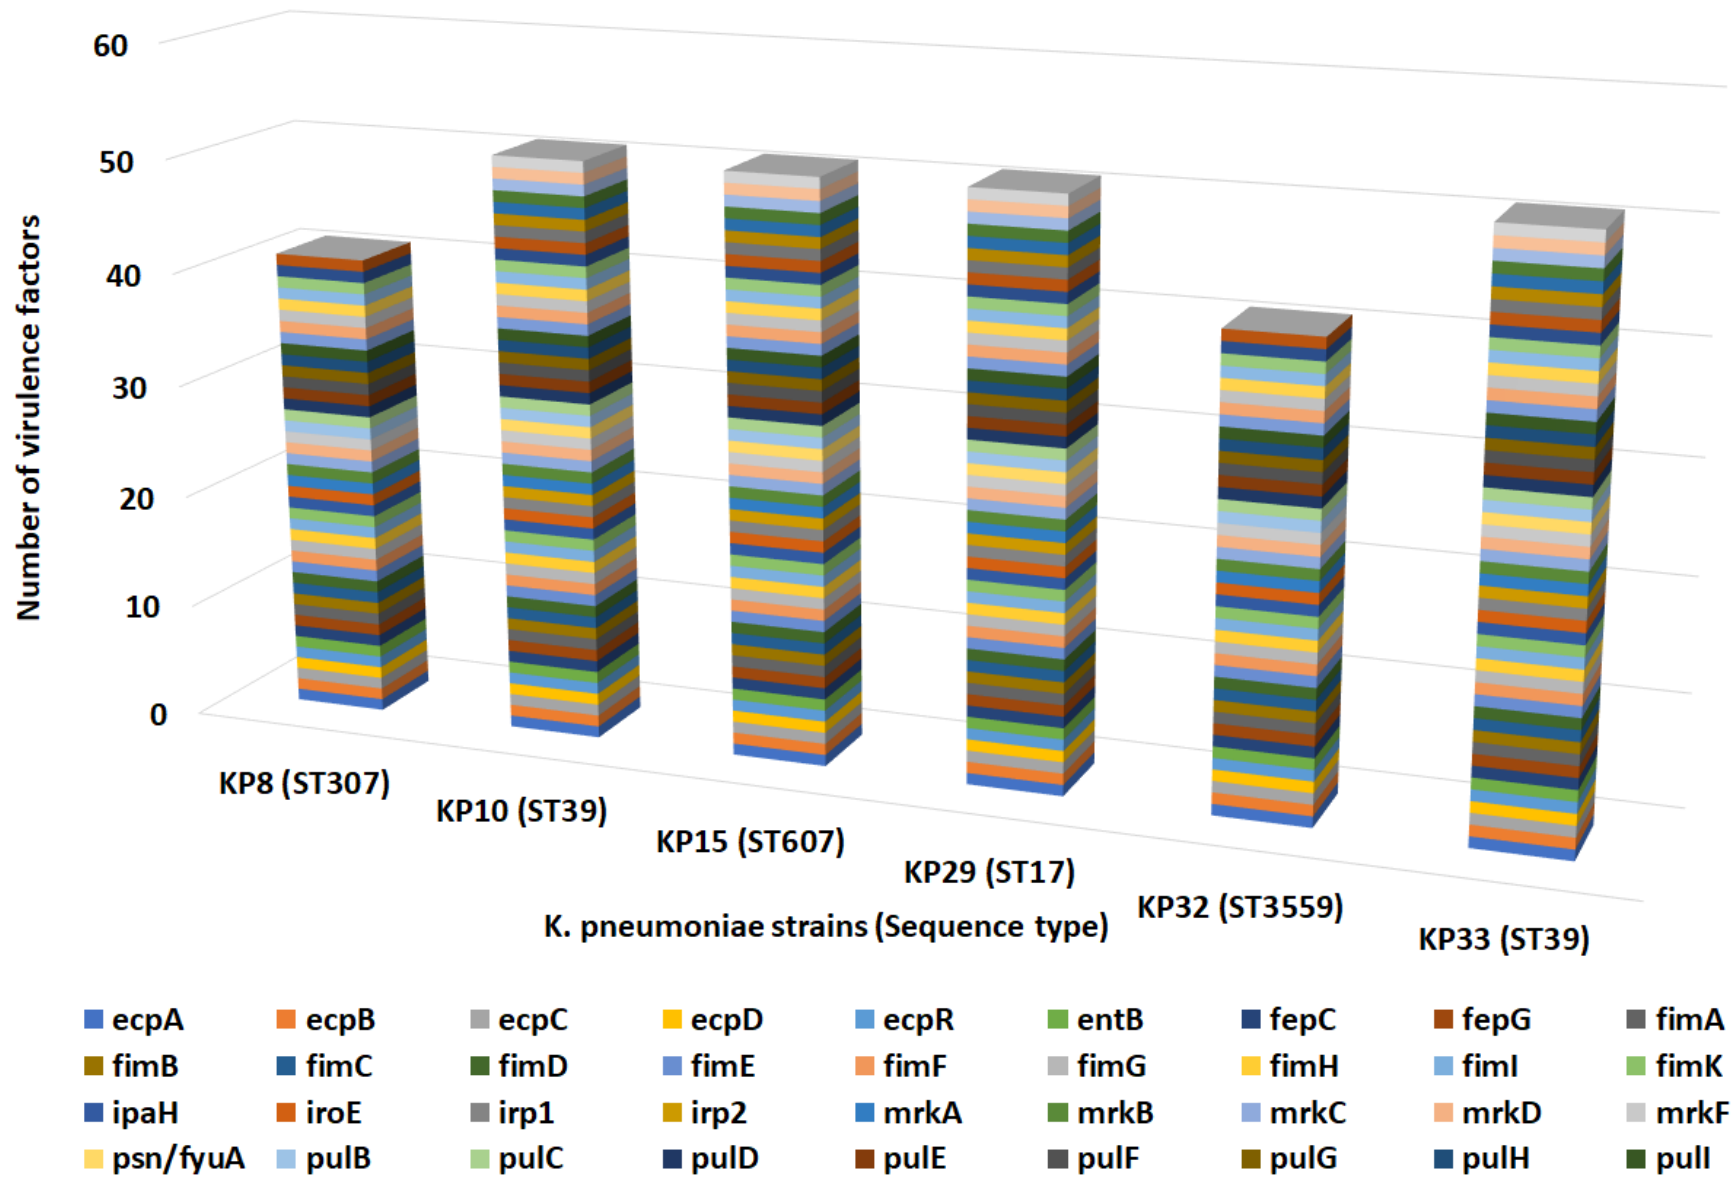

Figure S14.1

### Virulence factor-specimen association

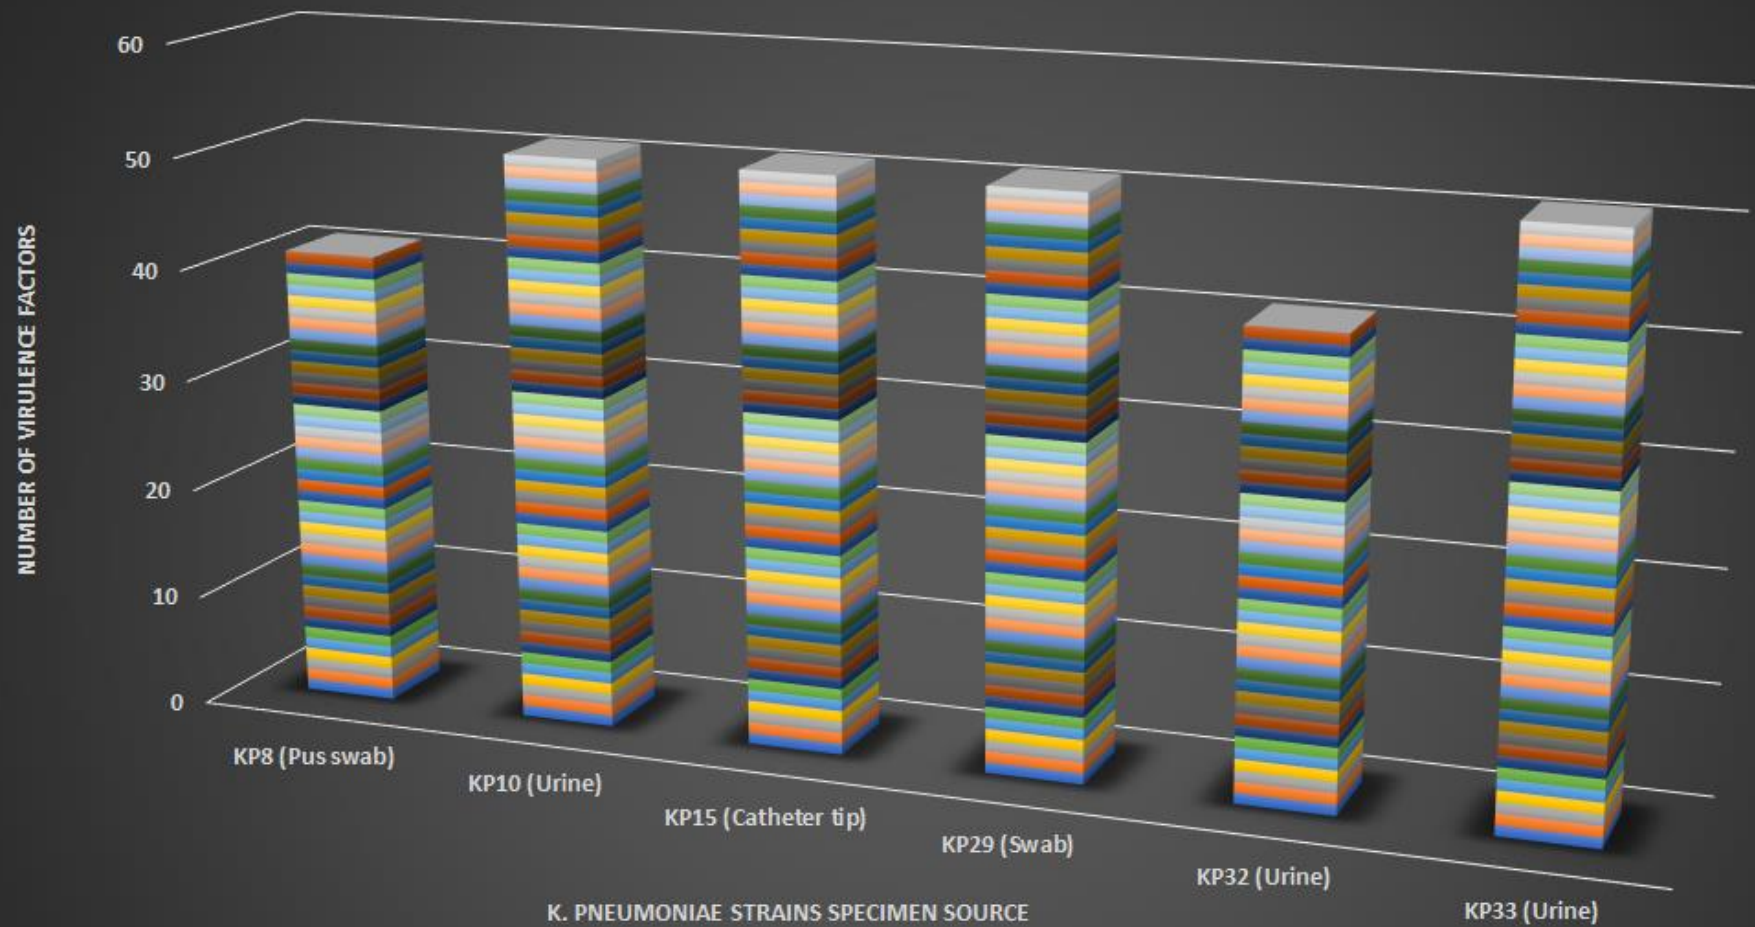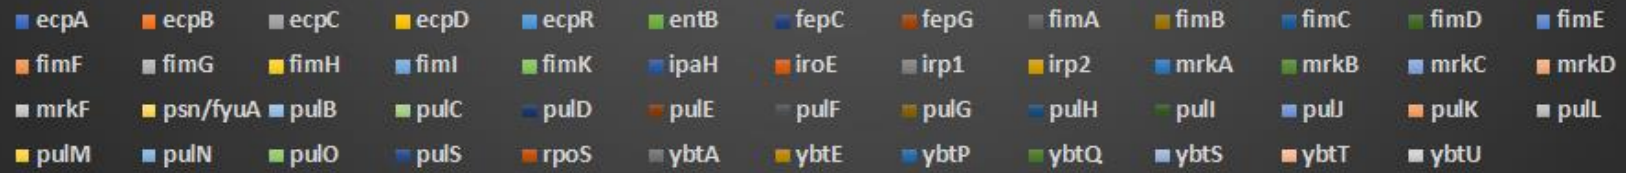

Figure S14.2

**KP8**      **Best locus: KL102**      **Match confidence ⓘ : None**      **Cov ⓘ : 77.30%**      **ID ⓘ : 99.11%**      **Genes: 11 / 17**

**KL102 reference ⓘ :**

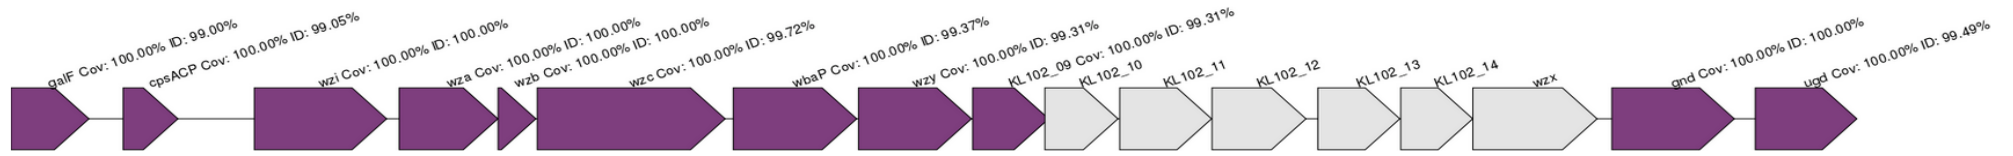

**Other genes found in locus ⓘ : 0** ▼      **Other genes found outside locus ⓘ : 2** ▼

**Allelic type ⓘ :**      wzc: 939    wzi: 173

**Assembly pieces ⓘ :**      [Download as FASTA](#)

**KL102 reference size ⓘ :** 21217

| Contig name | Start position | End position | Length |
|-------------|----------------|--------------|--------|
| Contig_5    | 3825862        | 3838302      | 12441  |
| Contig_11   | 2              | 3891         | 3890   |

**Length discrepancy ⓘ :** n/a

**KP8**      **Best locus: O2v2**      **Match confidence ⓘ : Low**      **Cov ⓘ : 93.58%**      **ID ⓘ : 98.43%**      **Genes: 8 / 10**

**O2v2 reference ⓘ :**

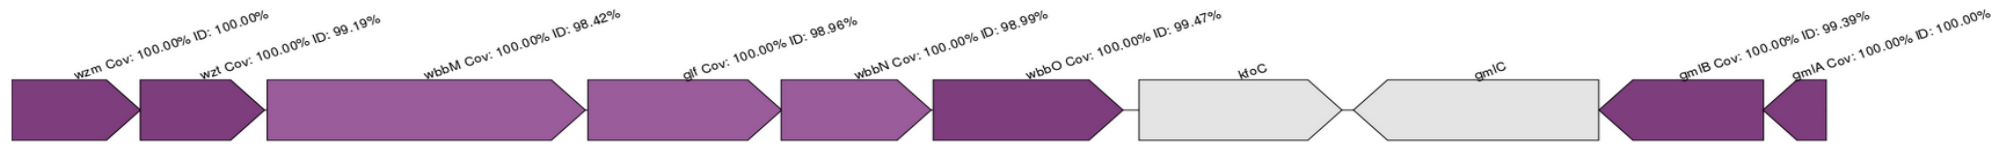

**Other genes found in locus ⓘ : 0** ▼      **Other genes found outside locus ⓘ : 0** ▼

**Assembly pieces ⓘ :**      [Download as FASTA](#)

**O2v2 reference size ⓘ :** 10812

| Contig name | Start position | End position | Length |
|-------------|----------------|--------------|--------|
| Contig_11   | 6927           | 14325        | 7399   |
| Contig_3    | 1              | 2650         | 2650   |

**Length discrepancy ⓘ :** n/a

**Figure S14.3**

KP10 Best locus: KL2 Match confidence ⓘ : None Cov ⓘ : 61.11% ID ⓘ : 99.67% Genes: 10 / 18

KL2 reference ⓘ :

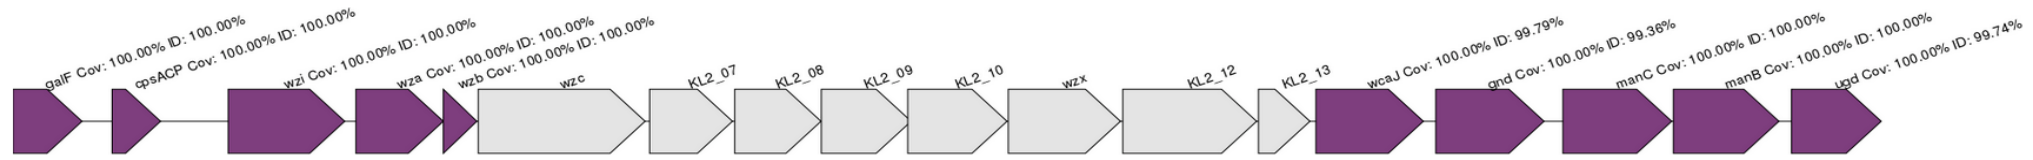

Other genes found in locus ⓘ : 0 Other genes found outside locus ⓘ : 2

Allelic type ⓘ : wzc: Not found wzi: 2

Assembly pieces ⓘ : [Download as FASTA](#)

KL2 reference size ⓘ : 24287

| Contig name | Start position | End position | Length |
|-------------|----------------|--------------|--------|
| Contig_2    | 774608         | 782598       | 7991   |
| Contig_3    | 1258500        | 1265243      | 6744   |

Length discrepancy ⓘ : n/a

KP10 Best locus: O1v1 Match confidence ⓘ : Very high Cov ⓘ : 100.00% ID ⓘ : 99.99% Genes: 7 / 7

O1v1 reference ⓘ :

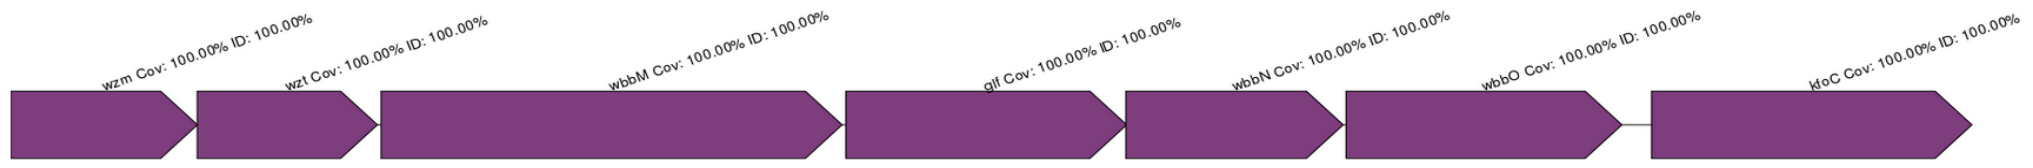

Other genes found in locus ⓘ : 0 Other genes found outside locus ⓘ : 4

Assembly pieces ⓘ : [Download as FASTA](#)

O1v1 reference size ⓘ : 8064

| Contig name | Start position | End position | Length |
|-------------|----------------|--------------|--------|
| Contig_2    | 763548         | 771611       | 8064   |

Length discrepancy ⓘ : 0 bp

Figure S14.4

KP15 Best locus: KL25 Match confidence ⓘ : High Cov ⓘ : 100.00% ID ⓘ : 98.52% Genes: 13 / 14

KL25 reference ⓘ :

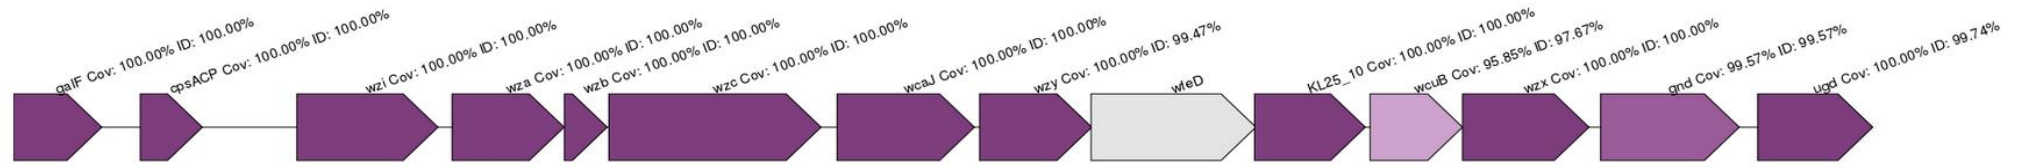

Other genes found in locus ⓘ : 0 ▼ Other genes found outside locus ⓘ : 2 ▼

Allelic type ⓘ : wzc: 26 wzi: 133

Assembly pieces ⓘ : [Download as FASTA](#)

KL25 reference size ⓘ : 18881

| Contig name | Start position | End position | Length |
|-------------|----------------|--------------|--------|
| Contig_2    | 288170         | 307053       | 18884  |

Length discrepancy ⓘ : +3 bp

KP15 Best locus: O1v1 Match confidence ⓘ : Very high Cov ⓘ : 100.00% ID ⓘ : 98.02% Genes: 7 / 7

O1v1 reference ⓘ :

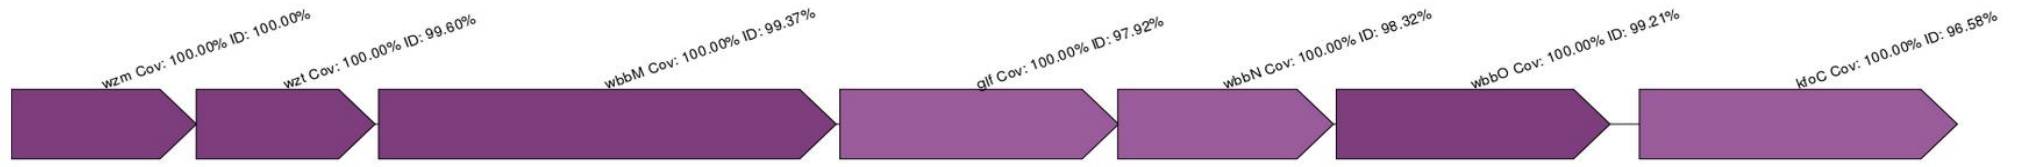

Other genes found in locus ⓘ : 0 ▼ Other genes found outside locus ⓘ : 2 ▼

Assembly pieces ⓘ : [Download as FASTA](#)

O1v1 reference size ⓘ : 8064

| Contig name | Start position | End position | Length |
|-------------|----------------|--------------|--------|
| Contig_2    | 275960         | 284021       | 8062   |

Length discrepancy ⓘ : -2 bp

Figure S14.5

KP29 Best locus: KL25 Match confidence ⓘ : None Cov ⓘ : 82.98% ID ⓘ : 99.02% Genes: 11 / 14

KL25 reference ⓘ :

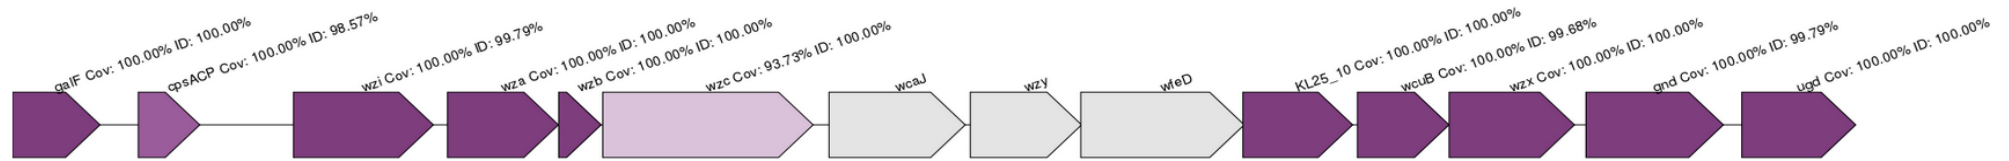

Other genes found in locus ⓘ : 0 Other genes found outside locus ⓘ : 3

Allelic type ⓘ : wzc: 26 wzi: 141

Assembly pieces ⓘ : [Download as FASTA](#)

KL25 reference size ⓘ : 18881

| Contig name | Start position | End position | Length |
|-------------|----------------|--------------|--------|
| Contig_4    | 497504         | 505058       | 7555   |
| Contig_6    | 3332025        | 3340094      | 8070   |

Length discrepancy ⓘ : n/a

KP29 Best locus: O5 Match confidence ⓘ : High Cov ⓘ : 100.00% ID ⓘ : 94.21% Genes: 8 / 8

O5 reference ⓘ :

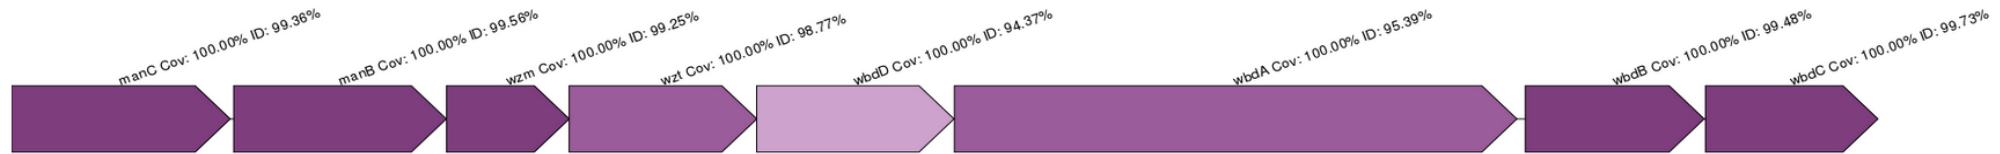

Other genes found in locus ⓘ : 0 Other genes found outside locus ⓘ : 0

Assembly pieces ⓘ : [Download as FASTA](#)

O5 reference size ⓘ : 12084

| Contig name | Start position | End position | Length |
|-------------|----------------|--------------|--------|
| Contig_4    | 482391         | 494474       | 12084  |

Length discrepancy ⓘ : 0 bp

Figure S14.6



KP32 Best locus: KL27 Match confidence ⓘ : Very high Cov ⓘ : 100.00% ID ⓘ : 99.27% Genes: 18 / 18

KL27 reference ⓘ :

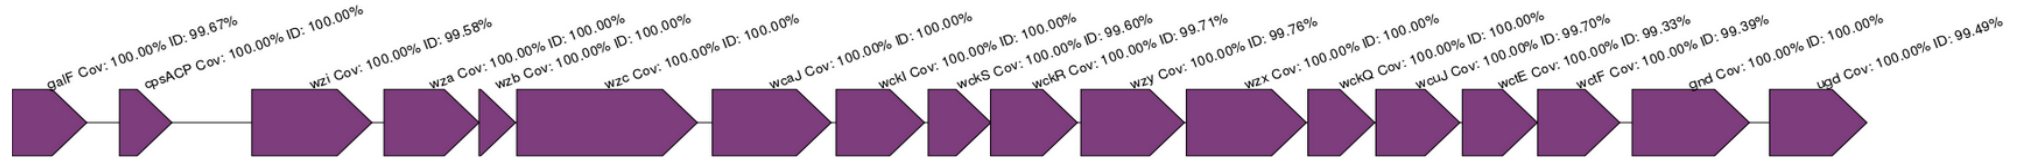

Other genes found in locus ⓘ : 0 Other genes found outside locus ⓘ : 1

Allelic type ⓘ : wzc: 28 wzi: 187

Assembly pieces ⓘ : [Download as FASTA](#)

KL27 reference size ⓘ : 22251

| Contig name | Start position | End position | Length |
|-------------|----------------|--------------|--------|
| Contig_1    | 4038684        | 4060933      | 22250  |

Length discrepancy ⓘ : -1 bp

KP32 Best locus: O4 Match confidence ⓘ : Very high Cov ⓘ : 100.00% ID ⓘ : 99.71% Genes: 6 / 6

O4 reference ⓘ :

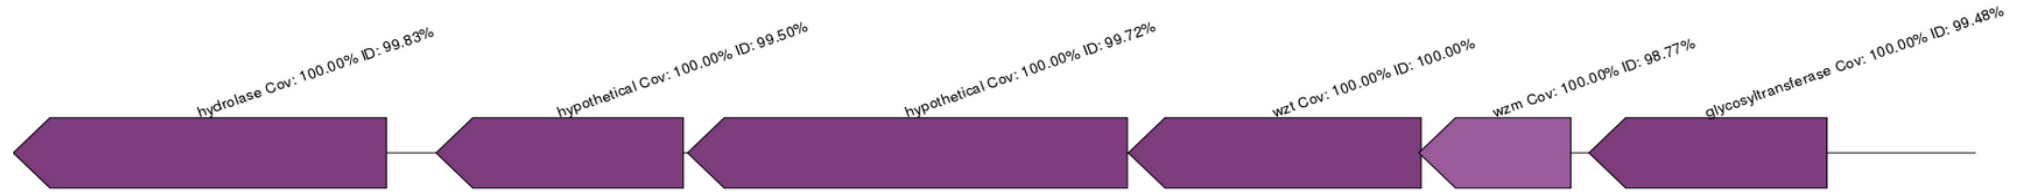

Other genes found in locus ⓘ : 0 Other genes found outside locus ⓘ : 0

Assembly pieces ⓘ : [Download as FASTA](#)

O4 reference size ⓘ : 9449

| Contig name | Start position | End position | Length |
|-------------|----------------|--------------|--------|
| Contig_1    | 4063220        | 4072669      | 9450   |

Length discrepancy ⓘ : +1 bp

Figure S14.7



KP33 Best locus: KL2 Match confidence ⓘ : None Cov ⓘ : 61.11% ID ⓘ : 99.67% Genes: 10 / 18

KL2 reference ⓘ :

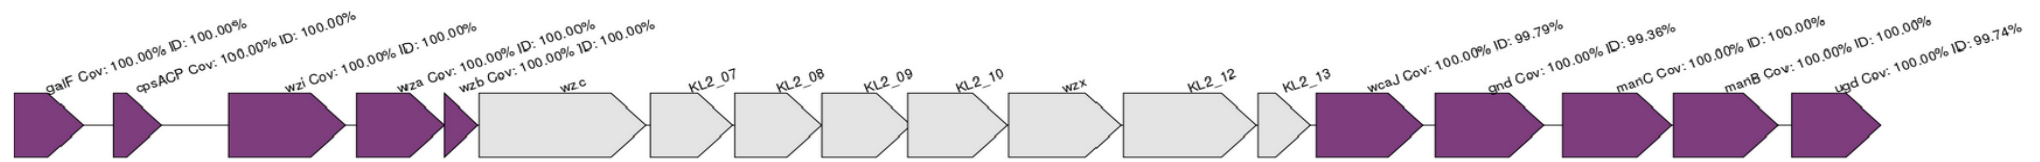

Other genes found in locus ⓘ : 0 Other genes found outside locus ⓘ : 2

Allelic type ⓘ : wzc: Not found wzi: 2

Assembly pieces ⓘ : [Download as FASTA](#)

KL2 reference size ⓘ : 24287

| Contig name | Start position | End position | Length |
|-------------|----------------|--------------|--------|
| Contig_2    | 774608         | 782598       | 7991   |
| Contig_3    | 1258500        | 1265243      | 6744   |

Length discrepancy ⓘ : n/a

KP33 Best locus: O1v1 Match confidence ⓘ : Very high Cov ⓘ : 100.00% ID ⓘ : 99.99% Genes: 7 / 7

O1v1 reference ⓘ :

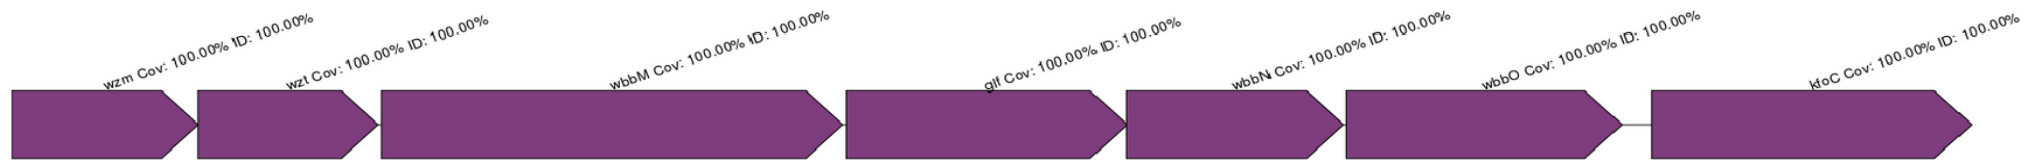

Other genes found in locus ⓘ : 0 Other genes found outside locus ⓘ : 4

Assembly pieces ⓘ : [Download as FASTA](#)

O1v1 reference size ⓘ : 8064

| Contig name | Start position | End position | Length |
|-------------|----------------|--------------|--------|
| Contig_2    | 763548         | 771611       | 8064   |

Length discrepancy ⓘ : 0 bp

Figure S14.8
